# Supplementary material for: Counselling for physical activity, life-space mobility and falls prevention in old age (COSMOS): protocol of a randomised controlled trial
Source: PubMed Central journal article supplement — BMJ Open. 2019 Sep 24;9(9):e029682. doi: 10.1136/bmjopen-2019-029682 (PMC6773309; doi:10.1136/bmjopen-2019-029682), 2019-09-24
Supplement: bmjopen-2019-029682.draft_revisions.pdf [file bmjopen-2019-029682.draft_revisions.pdf]

# BMJ Open

BMJ Open is committed to open peer review. As part of this commitment we make the peer review history of every article we publish publicly available.

When an article is published we post the peer reviewers' comments and the authors' responses online. We also post the versions of the paper that were used during peer review. These are the versions that the peer review comments apply to.

The versions of the paper that follow are the versions that were submitted during the peer review process. They are not the versions of record or the final published versions. They should not be cited or distributed as the published version of this manuscript.

BMJ Open is an open access journal and the full, final, typeset and author-corrected version of record of the manuscript is available on our site with no access controls, subscription charges or pay-per-view fees (<http://bmjopen.bmj.com>).

If you have any questions on BMJ Open's open peer review process please email [info.bmjopen@bmj.com](mailto:info.bmjopen@bmj.com)

# BMJ Open

## Counselling for physical activity, life-space mobility and falls prevention in old age (COSMOS): Protocol of a randomized controlled trial (ISRCTN65406039)

|                               |                                                                                                                                                                                                                                                                                                                                                                                                                                                                                                                                                                                                                                                                                                                                                                                                                                                                                                                                                                                                                                                                                                                                                                                                                                                                                                                                                                                                                                                                                                                                                                                                                                                                                                                                                                                                                                           |
|-------------------------------|-------------------------------------------------------------------------------------------------------------------------------------------------------------------------------------------------------------------------------------------------------------------------------------------------------------------------------------------------------------------------------------------------------------------------------------------------------------------------------------------------------------------------------------------------------------------------------------------------------------------------------------------------------------------------------------------------------------------------------------------------------------------------------------------------------------------------------------------------------------------------------------------------------------------------------------------------------------------------------------------------------------------------------------------------------------------------------------------------------------------------------------------------------------------------------------------------------------------------------------------------------------------------------------------------------------------------------------------------------------------------------------------------------------------------------------------------------------------------------------------------------------------------------------------------------------------------------------------------------------------------------------------------------------------------------------------------------------------------------------------------------------------------------------------------------------------------------------------|
| Journal:                      | <i>BMJ Open</i>                                                                                                                                                                                                                                                                                                                                                                                                                                                                                                                                                                                                                                                                                                                                                                                                                                                                                                                                                                                                                                                                                                                                                                                                                                                                                                                                                                                                                                                                                                                                                                                                                                                                                                                                                                                                                           |
| Manuscript ID                 | bmjopen-2019-029682                                                                                                                                                                                                                                                                                                                                                                                                                                                                                                                                                                                                                                                                                                                                                                                                                                                                                                                                                                                                                                                                                                                                                                                                                                                                                                                                                                                                                                                                                                                                                                                                                                                                                                                                                                                                                       |
| Article Type:                 | Protocol                                                                                                                                                                                                                                                                                                                                                                                                                                                                                                                                                                                                                                                                                                                                                                                                                                                                                                                                                                                                                                                                                                                                                                                                                                                                                                                                                                                                                                                                                                                                                                                                                                                                                                                                                                                                                                  |
| Date Submitted by the Author: | 05-Feb-2019                                                                                                                                                                                                                                                                                                                                                                                                                                                                                                                                                                                                                                                                                                                                                                                                                                                                                                                                                                                                                                                                                                                                                                                                                                                                                                                                                                                                                                                                                                                                                                                                                                                                                                                                                                                                                               |
| Complete List of Authors:     | Edgren, Johanna; Jyväskylän Yliopisto, Faculty of Sport and Health Sciences, Department of Health Sciences; Jyväskylän Yliopisto, Faculty of Sport and Health Sciences, Gerontology Research Center Karinkanta, Saija; UKK Institute for Health Promotion Research Rantanen, Taina; University of Jyväskylä, Faculty of Sport and Health Sciences, Department of Health Sciences; Jyväskylän Yliopisto, Faculty of Sport and Health Sciences, Gerontology Research Center Daly, Robin ; Deakin University, Institute for Physical Activity and Nutrition<br>Kujala, Urho; Jyväskylän Yliopisto, Faculty of Sport and Health Sciences, Department of Health Sciences<br>Törmäkangas, Timo; Jyväskylän Yliopisto, 1Faculty of Sport and Health Sciences, Department of Health Sciences; Jyväskylän Yliopisto, Faculty of Sport and Health Sciences, Gerontology Research Center Sievänen, Harri; UKK Institute for Health Promotion Research Kannus, Pekka; UKK Institute for Health Promotion Research Heinonen, Ari; University of Jyväskylä, Faculty of Sport and Health Sciences, Department of Health Sciences<br>Sipilä, Sarianna; Jyväskylän Yliopisto, Faculty of Sport and Health Sciences, Department of Health Sciences; Jyväskylän Yliopisto, Faculty of Sport and Health Sciences, Gerontology Research Center Kannas, Lasse ; Jyväskylän Yliopisto, Faculty of Sport and Health Sciences, Department of Health Sciences<br>Rantalainen, Timo; Jyväskylän Yliopisto, Faculty of Sport and Health Sciences, Department of Health Sciences<br>Teittinen, Outi; Jyväskylän Ammattikorkeakoulu, 5Research and Development, School of Health and Social Studies<br>Nikander , R ; Jyväskylän Yliopisto, Faculty of Sport and Health Sciences, Department of Health Sciences; GeroCenter Foundation for Aging Research & Development |
| Keywords:                     | older people, physical activity, falls, counselling, life-space mobility                                                                                                                                                                                                                                                                                                                                                                                                                                                                                                                                                                                                                                                                                                                                                                                                                                                                                                                                                                                                                                                                                                                                                                                                                                                                                                                                                                                                                                                                                                                                                                                                                                                                                                                                                                  |
|                               |                                                                                                                                                                                                                                                                                                                                                                                                                                                                                                                                                                                                                                                                                                                                                                                                                                                                                                                                                                                                                                                                                                                                                                                                                                                                                                                                                                                                                                                                                                                                                                                                                                                                                                                                                                                                                                           |

SCHOLARONE™  
Manuscripts

1  
2  
3  
4  
5  
6  
7  
8  
9  
10  
11  
12  
13  
14  
15  
16  
17  
18  
19  
20  
21  
22  
23  
24  
25  
26  
27  
28  
29  
30  
31  
32  
33  
34  
35  
36  
37  
38  
39  
40  
41  
42  
43  
44  
45  
46  
47  
48  
49  
50  
51  
52  
53  
54  
55  
56  
57  
58  
59  
60

1  
2  
3  
4  
5  
6  
7  
8  
9

## **Counselling for physical activity, life-space mobility and falls prevention in old age (COSMOS): Protocol of a randomized controlled trial (ISRCTN65406039)**

10 Edgren Johanna<sup>1,2</sup>, Karinkanta Saija<sup>3</sup>, Rantanen Taina<sup>1,2</sup>, Daly Robin M<sup>4</sup>, Kujala Urho M<sup>1</sup>,  
11 Törmäkangas Timo<sup>1,2</sup>, Sievänen Harri<sup>3</sup>, Kannus Pekka<sup>3</sup>, Heinonen Ari<sup>1</sup>, Sipilä Sarianna<sup>1,2</sup>,  
12 Kannas Lasse<sup>1</sup>, Rantalainen Timo<sup>1</sup>, Teittinen Outi<sup>5</sup>, Nikander Riku<sup>1,2,6</sup>

15 <sup>1</sup>Faculty of Sport and Health Sciences, Department of Health Sciences, University of Jyväskylä,  
16 Jyväskylä, Finland

17 <sup>2</sup>Faculty of Sport and Health Sciences, Gerontology Research Center, University of Jyväskylä,  
18 Jyväskylä, Finland

19 <sup>3</sup>UKK Institute for Health Promotion Research, Tampere, Finland

20 <sup>4</sup>Institute for Physical Activity and Nutrition, Deakin University, Geelong, Victoria, Australia

21 <sup>5</sup>Research and Development, School of Health and Social Studies, JAMK University of Applied  
22 Sciences, Jyväskylä, Finland

23 <sup>6</sup>GeroCenter Foundation for Aging Research & Development, Jyväskylä, Finland

24  
25  
26  
27

### **E-mails:**

28 johanna.edgren@jyu.fi

29 saija.karinkanta@ukkinstituutti.fi

30 taina.rantanen@jyu.fi

31 robin.daly@deakin.edu.au

32 urho.m.kujala@jyu.fi

33 timo.tormakangas@jyu.fi

34 harri.sievanen@ukkinstituutti.fi

35 pekka.kannus@ukkinstituutti.fi

36 ari.o.heinonen@jyu.fi

37 sarianna.sipila@jyu.fi

38 lasse.k.kannas@jyu.fi

39 timo.rantalainen@jyu.fi

40 outi.teittinen@jamk.fi

41 riku.p.nikander@jyu.fi

42  
43  
44  
45  
46

### **Corresponding author:**

47 Johanna Edgren

48 Faculty of Sport and Health Sciences/Gerontology Research Center

49 PL 35 (Viv)

50 40014 University of Jyväskylä

51 Finland

52 E-mail: johanna.edgren@jyu.fi

53 Tel: +358-40-8053869

54  
55  
56  
57

**Word count:** 4808

**Keywords:** counselling, falls, life-space mobility, older people, physical activity

**Issue date:** 5.2.2019

**Protocol version:** original (01)

## ABSTRACT

**Introduction:** The most promising way to promote active life years in old age is to promote regular participation in physical activity (PA). Maintaining lower extremity muscle function with good balance has been associated with fewer falls and the need of help from others. This article describes the design and intervention of a randomized controlled trial (RCT) investigating the effectiveness of a health and PA counselling program on life-space mobility and falls rates in community-dwelling older adults at the Health Kiosk and/or Service Centre environment.

**Methods and analysis:** Community-dwelling men and women (n=450) aged 65 years and over with early phase mobility limitation will be recruited to a 24-month RCT with a 24-month follow-up. Participants will be randomly allocated into either a health and PA counselling group (intervention) or sham exercise group (control). They receive five group specific face-to-face counselling sessions and 11 phone calls. The counselling intervention will include individualized health counselling, strength and balance training and guidance to regular PA. The control group will receive relaxation exercises. Outcomes will be assessed at baseline, 12, 24, and 48 months. Primary outcomes are average life-space mobility score and falls rates. Life-space mobility will be assessed by a validated questionnaire. Falls rates will be recorded from fall diaries. Secondary outcomes are data on fall-induced injuries and living-arrangements, number of fallers, fracture risk, mean level of PA, physical performance, quality of life, mood, cognition, balance confidence, and fear of falling. Data will be analyzed using the intention-to-treat principle. Cost-effectiveness of the program will be analyzed. Ancillary analyses are planned in participants with greater adherence.

**Ethics and dissemination:** Ethical approval was obtained from the Ethics Committee of the Tampere University Hospital (ref: R15160). Outcomes will be disseminated through publication in peer-reviewed journals and presentations international conferences.

**Trial registration:** Prospectively registered to ISRCTN (ISRCTN65406039).

### STRENGTHS AND LIMITATIONS OF THE STUDY

- This randomized controlled trial will investigate the effectiveness of a pragmatic home-based exercise program on life-space mobility and falls rates.
- The counselling protocol is delivered by nurses and physiotherapists according to current evidence-based principles to maximize long-term exercise adherence and commitment to physical activity, and to prevent falls.
- Counselling sessions take place at easily accessible community-based Health Kiosk and/or Service Centre environment.
- This will be the first randomized controlled trial to evaluate the effectiveness of health and physical activity counselling in a community-based environment to improve life-space mobility and prevent falls.
- Research nurses and research physiotherapists are not blinded to the random allocation.

## INTRODUCTION

The disablement process model by Verbrugge and Jette,[1] describes the path from pathology to disability via impairments and functional limitations. Accordingly, multiple health conditions (e.g. osteoarthritis and hypertension) may lead to physical impairments (e.g. weak leg extensor muscles), which may result in functional limitations (e.g. challenges with lower extremity function and balance). Functional limitations may finally lead to disability resulting in uncertainty to walk safely, an increased fear of falling and rate of falls, all of which can further reduce movement within a typical living area,[2, 3]. In addition, restricted life-space mobility can reduce participation in social activities, which can lead to little utilization of community amenities available. This vicious cycle can escalate as overall health and well-being of older adults deteriorates.

Developing and implementing effective strategies that prevent disability and falls among older people is an urgent public health issue since personal and societal impact from falls is enormous. Epidemiological studies have shown positive associations between PA and reduced risk for fracture through reduced risk of falls,[4-8]. However, some studies, including our previous work, suggest that regular participation in PA, especially frequent walking, may also increase older adults' fracture risk, probably due to increased exposure to fall hazards,[9-11]. Targeted exercise programs including muscle strength and balance training, such as the Otago Exercise Program, have been found to be effective at preventing falls and injurious falls among community-dwelling older adults,[12-14].

There is also evidence that older people with multiple risk factors for falls and thus at high risk of falling benefit from a multifactorial approach,[15]. For instance, a previous multifactorial trial (Chaos Falls Clinic), which included individualized 12-month falls prevention programme, in high-risk individuals aged 70 years or over reduced falls and fall-induced injuries by over 25%,[16]. Despite its effectiveness, multifactorial interventions can be expensive and labour-intensive. Less is known about other alternative health care platforms and concepts, which include low cost interventions that combine multiple preventive measures and offer these to all participants at the same concept,[15].

Community-based and easily accessible service platforms and concepts are potential for health and PA counselling since they may reach older people who already wish to change their lifestyle. In a way to reform of social and health care system in Finland and confront European megatrends such as the aging population with increasing public costs, Health Kiosks and Service Centres have been launched to enable rapid health screening and counselling to support people to

1  
2  
3 be active and participative in the society. Their focus is on health promotion and disability  
4 prevention. Scheduled appointments are not required and they are free of charge. Health Kiosk is  
5 a nurse-led pilot primary care service environment situating in a shopping center,[17, 18].  
6

7  
8 Service Centre is a modern meeting place for senior citizens with various indoor and outdoor  
9 activities. A rapid health screening with tailored counselling and guidance at an easily accessible  
10 environment can offer a modernized primary care concept to tackle or slow down progressive  
11 but early phase health issues and disablement processes. It may also provide a unique  
12 opportunity to increase PA, support physical function, and avoid falls, depressive symptoms and  
13 social isolation,[17, 18].  
14

15  
16 To our knowledge, this will be the first RCT to evaluate the effectiveness of health and PA  
17 counselling in a community-based Health Kiosk and/or Service Centre environment to improve  
18 life-space mobility and prevent falls. Another novel aspect is that we will assess simultaneously  
19 changes in the ratio of falls rates and the difference in rate changes in the life-space mobility  
20 outcome.  
21  
22  
23  
24  
25  
26  
27  
28  
29  
30

### 31 **TRIAL OBJECTIVES**

32  
33 The primary aim of this randomized controlled trial (RCT) named “Counselling for physical  
34 activity, life-space mobility and falls prevention in old age” (COSMOS) is to examine the  
35 effectiveness of the community-based health and PA counselling program in increasing life-space  
36 mobility and reducing the rate of falls in community-dwelling elderly people.  
37  
38  
39

40  
41 More specifically, the COSMOS study is a 24-month effectiveness RCT with a 24-month follow-  
42 up at a community-based environment to examine whether individualized health counselling with  
43 a strength and balance exercise program and prescription of regular PA is effective at improving  
44 life-space mobility and reducing the falls rates. Secondary aims of the study are to evaluate the  
45 effects of the counselling intervention on data on fall-induced injuries and living-arrangements,  
46 number of fallers, fracture risk, mean level of PA, physical performance, quality of life, mood,  
47 cognition, and balance confidence. We will also evaluate the cost-effectiveness of the counselling  
48 program within the community-based environment for falls and whether any of the aforementioned  
49 potential benefits can be maintained two years after the end of 24-month intervention.  
50  
51  
52  
53  
54  
55  
56  
57  
58  
59  
60



**Table 1.** Condensed trial registration data

| Data category                         | Information                                                                                                                                                                                                                                                                                                                                                                                                                                                                                                                                                                                                                                                                                                                                                                                                                                                                                                                                                                                                                                                                                                                                                                                                                                                                                                                                                                                                                                                                                                                                                                                                                                                                                                                                    |
|---------------------------------------|------------------------------------------------------------------------------------------------------------------------------------------------------------------------------------------------------------------------------------------------------------------------------------------------------------------------------------------------------------------------------------------------------------------------------------------------------------------------------------------------------------------------------------------------------------------------------------------------------------------------------------------------------------------------------------------------------------------------------------------------------------------------------------------------------------------------------------------------------------------------------------------------------------------------------------------------------------------------------------------------------------------------------------------------------------------------------------------------------------------------------------------------------------------------------------------------------------------------------------------------------------------------------------------------------------------------------------------------------------------------------------------------------------------------------------------------------------------------------------------------------------------------------------------------------------------------------------------------------------------------------------------------------------------------------------------------------------------------------------------------|
| Registry and trial identifying number | ISRCTN registry<br>ISRCTN65406039                                                                                                                                                                                                                                                                                                                                                                                                                                                                                                                                                                                                                                                                                                                                                                                                                                                                                                                                                                                                                                                                                                                                                                                                                                                                                                                                                                                                                                                                                                                                                                                                                                                                                                              |
| Date of registration                  | 27/11/2015                                                                                                                                                                                                                                                                                                                                                                                                                                                                                                                                                                                                                                                                                                                                                                                                                                                                                                                                                                                                                                                                                                                                                                                                                                                                                                                                                                                                                                                                                                                                                                                                                                                                                                                                     |
| Recruitment status                    | Recruiting (start date 01/01/2016 – end date 31/3/2019)                                                                                                                                                                                                                                                                                                                                                                                                                                                                                                                                                                                                                                                                                                                                                                                                                                                                                                                                                                                                                                                                                                                                                                                                                                                                                                                                                                                                                                                                                                                                                                                                                                                                                        |
| Funder(s)                             | Academy of Finland                                                                                                                                                                                                                                                                                                                                                                                                                                                                                                                                                                                                                                                                                                                                                                                                                                                                                                                                                                                                                                                                                                                                                                                                                                                                                                                                                                                                                                                                                                                                                                                                                                                                                                                             |
| Primary sponsor                       | Department of Sport and Health Sciences, PL 35, 40014 University of Jyväskylä, Finland                                                                                                                                                                                                                                                                                                                                                                                                                                                                                                                                                                                                                                                                                                                                                                                                                                                                                                                                                                                                                                                                                                                                                                                                                                                                                                                                                                                                                                                                                                                                                                                                                                                         |
| Primary Contact                       | Dr Johanna Edgren, johanna.edgren@jyu.fi                                                                                                                                                                                                                                                                                                                                                                                                                                                                                                                                                                                                                                                                                                                                                                                                                                                                                                                                                                                                                                                                                                                                                                                                                                                                                                                                                                                                                                                                                                                                                                                                                                                                                                       |
| Contact (scientific)                  | Dr Riku Nikander, riku.p.nikander@jyu.fi                                                                                                                                                                                                                                                                                                                                                                                                                                                                                                                                                                                                                                                                                                                                                                                                                                                                                                                                                                                                                                                                                                                                                                                                                                                                                                                                                                                                                                                                                                                                                                                                                                                                                                       |
| Public title                          | Counselling for physical activity, life-space mobility and falls prevention in old age                                                                                                                                                                                                                                                                                                                                                                                                                                                                                                                                                                                                                                                                                                                                                                                                                                                                                                                                                                                                                                                                                                                                                                                                                                                                                                                                                                                                                                                                                                                                                                                                                                                         |
| Scientific title                      | Physical activity counselling and exercise program targeting for increased physical activity, life-space mobility and falls prevention among community-dwelling older people: A single-center randomized controlled trial                                                                                                                                                                                                                                                                                                                                                                                                                                                                                                                                                                                                                                                                                                                                                                                                                                                                                                                                                                                                                                                                                                                                                                                                                                                                                                                                                                                                                                                                                                                      |
| Acronym                               | COSMOS                                                                                                                                                                                                                                                                                                                                                                                                                                                                                                                                                                                                                                                                                                                                                                                                                                                                                                                                                                                                                                                                                                                                                                                                                                                                                                                                                                                                                                                                                                                                                                                                                                                                                                                                         |
| Countries of recruitment              | Finland                                                                                                                                                                                                                                                                                                                                                                                                                                                                                                                                                                                                                                                                                                                                                                                                                                                                                                                                                                                                                                                                                                                                                                                                                                                                                                                                                                                                                                                                                                                                                                                                                                                                                                                                        |
| Condition                             | Falls                                                                                                                                                                                                                                                                                                                                                                                                                                                                                                                                                                                                                                                                                                                                                                                                                                                                                                                                                                                                                                                                                                                                                                                                                                                                                                                                                                                                                                                                                                                                                                                                                                                                                                                                          |
| Study design                          | Single-centre randomized controlled trial                                                                                                                                                                                                                                                                                                                                                                                                                                                                                                                                                                                                                                                                                                                                                                                                                                                                                                                                                                                                                                                                                                                                                                                                                                                                                                                                                                                                                                                                                                                                                                                                                                                                                                      |
| Trial setting                         | Community                                                                                                                                                                                                                                                                                                                                                                                                                                                                                                                                                                                                                                                                                                                                                                                                                                                                                                                                                                                                                                                                                                                                                                                                                                                                                                                                                                                                                                                                                                                                                                                                                                                                                                                                      |
| Intervention(s)                       | Control group: Participants will receive a placebo intervention including five face-to-face sessions of relaxation exercises. In addition, 11 supportive telephone calls will be provided.<br>Intervention group: Participants will receive five Health Kiosk-based 1.5-hour sessions including a 30-minute counselling session for motivation together with a 1-hour exercise education session. Exercise education contains strengthening exercises for lower extremity muscles. The program also includes balance, walking and stair climbing exercises and active range of movement exercises. During the sessions the exercise referral to the local community specialized gym will be also given. In addition, 11 supportive telephone calls will be provided. Safety issues of physical activity, counselling to reduce alcohol consumption and smoking, recommendation to use anti-slippery shoe devices will be advised. The total duration of the intervention is 24 months. Both groups are followed up 24 months after the intervention.                                                                                                                                                                                                                                                                                                                                                                                                                                                                                                                                                                                                                                                                                           |
| Primary outcome(s)                    | 1. Life-space mobility is assessed by a validated questionnaire at baseline, 12, 24 and 48 months.<br>2. Falls rates are assessed by daily filled and monthly returned fall diaries during the 24-month intervention.                                                                                                                                                                                                                                                                                                                                                                                                                                                                                                                                                                                                                                                                                                                                                                                                                                                                                                                                                                                                                                                                                                                                                                                                                                                                                                                                                                                                                                                                                                                          |
| Secondary outcomes                    | 1. Physical activity (PA): The Finnish Hookie AM 20 triaxial accelerometer will be used to measure all PA over a 7-day period. PA and exercise diary will also be used during the first 24 months' period of the study. Self-reported PA will also be quantified using the scale by Grimby with slight modifications.<br>2. Physical performance is measured using the Timed Up and Go-test (TUG), Short Physical Performance Battery (SPPB) and handgrip strength (Jamar hand dynamometer) at baseline, 12, 24 and 48 months.<br>3. Number of fallers i.e. a fall indicator variable (yes/no) based on daily filled and monthly returned fall-diaries during the 24-month intervention.<br>4. Fall-induced injuries based on daily filled and monthly returned fall-diaries during the 24-month intervention. Hospital registers are used to verify severe injuries.<br>5. Quality of life is assessed using The World Health Organization Quality of Life (WHOQoL) questionnaire at baseline, 12, 24 and 48 months.<br>6. Living-arrangements are determined by asking patients at baseline, 12, 24 and 48 months.<br>7. Fracture risk is assessed using the WHO Fracture Risk Assessment Tool at baseline, 12, 24 and 48 months.<br>8. Depressive mood is assessed using the Geriatric Depression Scale (GDS-15) at baseline, 12, 24 and 48 months.<br>9. Cognitive status is assessed using the Mini-Mental State Examination (MMSE) at baseline, 12, 24 and 48 months.<br>10. Balance confidence as a measure of fear of falling is assessed using the Activities-specific Balance Confidence scale (ABC) at baseline, 12, 24 and 48 months.<br>11. Fear of falling is assessed (yes/no) and measured by the Visual Analogue Scale (VAS). |
| Participant inclusion criteria        | 1. Aged 65 years or over<br>2. Community-living people<br>3. Living in Ylöjärvi, Finland, or neighbouring municipalities<br>4. At least minor mobility difficulty                                                                                                                                                                                                                                                                                                                                                                                                                                                                                                                                                                                                                                                                                                                                                                                                                                                                                                                                                                                                                                                                                                                                                                                                                                                                                                                                                                                                                                                                                                                                                                              |
| Target sample size                    | 450                                                                                                                                                                                                                                                                                                                                                                                                                                                                                                                                                                                                                                                                                                                                                                                                                                                                                                                                                                                                                                                                                                                                                                                                                                                                                                                                                                                                                                                                                                                                                                                                                                                                                                                                            |
| Participant exclusion criteria        | 1. Severe functional limitations (unable to walk 500 m unaided)<br>2. Severe cardiovascular or pulmonary disease<br>3. Severe progressive disease<br>4. Terminally ill (predicted lifetime <12 months)<br>5. Memory impairment (MMSE score 21 points or less)<br>6. Living in an institution<br>7. Unwilling to be randomized<br>8. Alcoholism (AUDIT score ≥ 15)                                                                                                                                                                                                                                                                                                                                                                                                                                                                                                                                                                                                                                                                                                                                                                                                                                                                                                                                                                                                                                                                                                                                                                                                                                                                                                                                                                              |

## METHODS AND DESIGN

This protocol article is written based on the SPIRIT reporting guidelines,[19]. The trial protocol was prospectively registered to ISRCTN (ISRCTN65406039). Condensed trial registration information is outlined in *Table 1* and an overview of the experimental design is illustrated in *Figure 1*.

### Trial design and study setting

COSMOS is a pragmatic single-blinded RCT in which participants will be randomized into one of two groups: 1) the health and PA counselling intervention or 2) the relaxation intervention (control). All participants will be assessed at baseline and after 12- and 24-months. Additionally, there will be follow-up measurements at 48-months. All assessments will begin with a structured interview and health examination done by a research nurse and continue with physical performance tests carried out by a research physiotherapist. All assessments and counselling sessions will take place at the Health Kiosk of Ylöjärvi or at the Service Centre of Ylöjärvi, Finland. Ylöjärvi is a municipality of 32 000 inhabitants including suburban and rural areas. Study participants can choose themselves the place they would prefer to visit.

### Participant eligibility

The target number of participants is 450 randomly allocated to each group (n=225 each). Both men and women will be recruited. Participant *inclusion criteria* are as follows: 1) aged 65 years or over, 2) community-living people, 3) living in Pirkanmaa District, Finland, and 4) at least minor self-reported mobility difficulty.

*Mobility difficulty* will be assessed by using a structured and validated interview asking each participant about his or her ability to walk 2.0 km, walk 0.5 km, and climb up one flight of stairs,[20]. The questions are formulated as follows: “Do you have difficulty in ...” with five alternative response options provided: 1) ...able to manage without difficulty, 2) ...able to manage with some difficulty, 3) ...able to manage with great deal of difficulty, 4) ...able to manage only with help of another person, and 5) ...unable to manage even with help. To identify persons with minor mobility difficulty, additional questions are posed to participants who do not report task difficulty with any of the above questions. The questions concern the modification of task performance and the alternatives given are: resting in the middle of the performance, using an aid, taking support from handrails, having reduced the frequency of performing the task, having slowed down performance of the task, experiencing tiredness when performing the task,

1  
2  
3 or some other change in carrying out the task. *Minor mobility difficulty* is considered if  
4 participant reports task modification in one or more of the tasks listed above.  
5  
6

7 Participant *exclusion criteria* are following: 1) severe functional limitations (unable to walk 500  
8 meters unaided), 2) severe cardiovascular or pulmonary disease, 3) severe progressive disease, 4)  
9 terminally ill (predicted life expectancy <12 months), 5) memory impairment (MMSE score 21  
10 points or less),[21], 6) living in an institution, 7) unwilling to be randomized, or 8) alcoholism  
11 (AUDIT score  $\geq 15$ ),[22].  
12  
13  
14  
15

## 16 **Recruitment**

17  
18 We will recruit eligible men and women during their Health-Kiosk and Service Centre visits as  
19 well as via newspaper advertisements, notice boards, community centers, and at senior events.  
20 All participants will be initially screened for eligibility over the telephone where they will have  
21 the opportunity to ask questions and have an informed discussion with research staff. Following  
22 the telephone screening, those who are eligible and are willing to participate, will receive an  
23 information letter, consent forms and reply-paid envelope. Upon receiving a signed informed  
24 consent form, a member of the research team will sign each form prior to the baseline  
25 assessments. Potential participants will be invited to the baseline assessments, where a trained  
26 research nurse confirms their eligibility with a structured interview and health examination.  
27  
28  
29  
30  
31  
32  
33  
34

## 35 **Random allocation**

36  
37 Participants will be randomly allocated into either 1) the health and PA counselling intervention  
38 or 2) the sham exercise intervention (control). A computer generated randomization protocol will  
39 be created by a statistician who is not part of the research team. Random allocation will be  
40 stratified by sex, age (65-79 years/80 years or older) and presence or absence of falls during the  
41 last 24 months. Block size of 6, 8, 10 or 12 will be randomly varied to ensure the equality of  
42 group sizes (allocation ratio 1:1). Allocation results will be stored in sealed envelopes and stored  
43 in locked cabin. After the baseline measurements, a researcher will open one envelope according  
44 to each participant's sex, age and previous falls and then verifies to the research records, in  
45 which intervention participant is allocated. Participants are not informed whether they belong to  
46 the superior or control intervention (i.e. health and PA counselling versus sham exercise).  
47 Allocation concealment will be ensured, as the randomisation code will only be released until the  
48 end of the study. Research nurses and physiotherapists are not blinded to the group allocation  
49 since limited personnel resources. The principal investigator will be blinded.  
50  
51  
52  
53  
54  
55  
56  
57  
58  
59  
60

## Interventions

The COSMOS study involves two interventions: 1) *health and PA counselling intervention* and 2) *sham exercise (relaxation)*. **Supplementary figure** describes the participant timeline. Both interventions include five face-to-face sessions taking place at week one and one, three, six, and 12 months after the baseline measurements. Both intervention programs will be updated to the next level during each face-to-face session. Participants will be provided with 11 supportive telephone calls, regardless of the intervention, which will be delivered at two, four, five, seven, eight, nine, ten, 11, 16, 20 and 23 months after baseline. The total duration of the interventions is 24 months. At the end of the first face-to-face session, physiotherapist informs the participant on how to fill out the PA and falls diary.

### ***Health and physical activity counselling intervention***

Participants randomized to the health and PA counselling intervention will receive five individually tailored 1.5-hour face-to-face sessions containing a 30-minute health counselling session by a trained research nurse together with a 60-minute PA counselling session delivered by an experienced research physiotherapist.

*The health counselling* follows the motivational interviewing concept,[23] based on social cognitive theory,[24] and the trans-theoretical model,[25]. The structure of the health counselling is based on the guidelines of the IKINÄ-manual, which is a guide for preventing falls and harm from falls in older people, released by the Finnish National Institute for Health and Welfare,[26]. Accordingly, during health counselling sessions the nurse will advise participants on safety issues related to their home-environment, such as providing recommendations to use anti-slippery shoe devices during winter, and participating in regular PA. Additionally, participants in the health and PA counselling intervention receive handouts on how to avoid fall accidents in the home environment and outdoors. Moreover, health counselling sessions will include counselling for a healthy diet and recommendations to reduce alcohol consumption and smoking based on the discussions with the participant about her/his background and habits, and motivation to change,[23]. The nurse will also discuss topical and relevant health related issues with health and PA counselling intervention members i.e. managing blood pressure, medication, and depressive mood.

*The PA counselling* is based on the modified version of Otago Exercise Program (OEP, available online),[27]. The OEP is an innovative model of low frequency physical activity counselling and exercise training tailored for older people and typically delivered by physiotherapist at older

people's home. It contains four levels (A, B, C, and D) which all contain strengthening exercises for lower extremity muscles as well as balance, walking and stair climbing exercises and active range of movement exercises (e.g. neck rotations and hip and knee extensions). The exercises on each level take about 30 minutes to complete. Participants are expected to exercise three times a week at home and go for a walk at least twice a week. The participants will receive progressive illustrated instructions. Physiotherapist may modify and apply the OEP individually based on health, motivational status, and participant goals. For this study, two additional training levels (COSMOS 1 and COSMOS 2, illustrated in **Table 2**) have been developed to ensure progression throughout the 24-month intervention for the most advanced and motivated participants.

During the PA counselling sessions, a physiotherapist will also discuss the importance of regular and diverse PA and presents the Physical Activity Pie for Older Adults (Finnish recommendations for PA among 65 years old and older) ([http://www.ukkinstituutti.fi/filebank/64-physical\\_activity\\_pie.pdf](http://www.ukkinstituutti.fi/filebank/64-physical_activity_pie.pdf)). In addition, therapist will provide an exercise referral to the local community exercise facilities based on the earlier discussions with the participant about her/his background and motivation to exercise. Participants will also be provided with ankle weights (0.5–5.0 kg) for the first 12 months. Thereafter, therapist will encourage participants to attend a local gym or be involved with other community exercise facilities.

**Table 2.** Content of the COSMOS 1 and 2 levels

|                                | <b>COSMOS 1</b>                                                                                                                                                                                                                                                                           | <b>COSMOS 2</b>                                                                                                                               |
|--------------------------------|-------------------------------------------------------------------------------------------------------------------------------------------------------------------------------------------------------------------------------------------------------------------------------------------|-----------------------------------------------------------------------------------------------------------------------------------------------|
| <b>Warm-up</b>                 | Same as in the Otago Exercise Program                                                                                                                                                                                                                                                     | Same as in the Otago Exercise Program                                                                                                         |
| <b>Strengthening exercises</b> | <ul style="list-style-type: none"> <li>• One legged squat</li> <li>• One legged sit to stand</li> <li>• Sideways squats</li> <li>• Jumping exercises</li> </ul>                                                                                                                           | Same strengthening exercises as in the COSMOS 1<br>→ Repetitions and series are updated and jumping exercises are extended and more demanding |
| <b>Balance exercises</b>       | <ul style="list-style-type: none"> <li>• Same as in the D level of the Otago Exercise Program but stair climbing is replaced with squats</li> <li>• Additionally, multitasking is incorporated into all exercises (e.g., participants count repetitions or seconds backwards).</li> </ul> | Same balance exercises as in the COSMOS 1 level but all exercises are performed with eyes closed                                              |

### ***Sham exercise intervention (control group)***

Participants randomized to the sham exercise intervention will receive five 45-minute face-to-face sessions of structured relaxation exercises instructed by a physiotherapist. We believe that offering relaxation exercises will motivate the control participants to continue in the study without increasing their PA. The relaxation program will be updated during each face-to-face session and will proceed as follows: 1) learning the diaphragmatic respiration technique, 2) learning the tension-relaxation technique, 3) utilizing tension-relaxation technique, 4) utilizing techniques learned in previous exercises to whole body relaxation, and 5) learning consciousness of the body sensations. All exercises will be performed on a compact disc (CD) or via mp3-format. Additionally, written instructions will be available. During the first face-to-face session, participants will receive the same handouts as the health and PA counselling intervention members on how to avoid fall accidents in the home environment and outdoors.

### ***Supportive telephone calls***

During 11 supportive telephone calls, physiotherapist will enquire about how exercise (PA or relaxing program) is progressing, has the participant fallen and ensure that the most recent fall and exercise diary is returned. Additionally, therapists will confirm or schedule the next face-to-face session or 12- and 24-month follow-up measurements when appropriate. If a participant has fallen, therapists will confirm the circumstances and consequence related to the fall/falls. For those in the health and PA counselling intervention group, the therapist will also discuss if there is a need to update the program, i.e. revise the number of repetitions and/or series or change the magnitude of the ankle weight before the next face-to-face session.

### **Outcomes**

Assessments will include a comprehensive battery of tests and questionnaires on mobility, physical activity, physical function and health. The baseline assessment will take about 2 h to complete whereas 12-month and 24-month assessments will take about 1.5 h. The order of the assessments and measurements is standardized at each time point. **Table 3** presents the outcome and other variables, methods and schedule of the assessments in the study.

### ***Primary outcomes***

Daily filled and monthly returned fall diaries will be used to gather information on the *falls rates* during the 24-month intervention. A fall is defined as an unexpected event in which participant comes to rest on the ground, floor or other lower level [28]. A research physiotherapist will phone monthly all those participants who have reported a fall or falls or if a diary is not returned.

**Table 3.** Outcome and other variables, methods and schedule of the assessments

| <b>Continuous monitoring</b>                                                                                                                                                          | <b>BL</b> | <b>12-month</b> | <b>24-month</b> | <b>48-month</b> | <b>O</b> |
|---------------------------------------------------------------------------------------------------------------------------------------------------------------------------------------|-----------|-----------------|-----------------|-----------------|----------|
| <b>Falls rates</b>                                                                                                                                                                    |           |                 |                 |                 | <b>P</b> |
| Daily filled and monthly returned diaries                                                                                                                                             | N         | Y               | Y               | Y               |          |
| Number of fallers i.e. a fall indicator variable (yes/no)                                                                                                                             |           |                 |                 |                 | S        |
| Daily filled and monthly returned diaries                                                                                                                                             | N         | Y               | Y               | Y               |          |
| <b>Fall-induced injuries</b>                                                                                                                                                          |           |                 |                 |                 | S        |
| Daily filled and monthly returned diaries and telephone interviews                                                                                                                    | N         | Y               | Y               | N               |          |
| Hospital registers are used to verify severe injuries                                                                                                                                 | N         | Y               | Y               | Y               |          |
| <b>Health service use</b>                                                                                                                                                             |           |                 |                 |                 |          |
| Hospital registers are used to verify severe injuries                                                                                                                                 | N         | Y               | Y               | Y               |          |
| <b>Adverse events due to interventions</b>                                                                                                                                            |           |                 |                 |                 |          |
| Daily filled and monthly returned diaries and telephone interviews                                                                                                                    | N         | Y               | Y               | N               |          |
| <b>Participant adherence to the interventions</b>                                                                                                                                     |           |                 |                 |                 |          |
| Average number and duration of exercise sessions and total number and duration of exercise sessions based on daily filled and monthly returned physical activity and exercise diaries | N         | Y               | Y               | N               |          |
| <b>Perceived exertion of interventions</b>                                                                                                                                            |           |                 |                 |                 |          |
| Modified Borg scale (range 0-10)                                                                                                                                                      | N         | Y               | Y               | N               |          |
| <b>Physical, cognitive and social assessments</b>                                                                                                                                     | <b>BL</b> | <b>12-month</b> | <b>24-month</b> | <b>48-month</b> |          |
| <b>Physical activity</b>                                                                                                                                                              |           |                 |                 |                 | S        |
| Hookie AM 20 triaxial accelerometer for 7 days                                                                                                                                        | Y         | Y               | Y               | N               |          |
| Daily filled and monthly returned physical activity and exercise diaries                                                                                                              | N         | Y               | Y               | N               |          |
| Validated questionnaire (Scale of Grimby)                                                                                                                                             | Y         | Y               | Y               | Y               |          |
| <b>Physical performance</b>                                                                                                                                                           |           |                 |                 |                 | S        |
| Timed Up and Go-test (TUG)                                                                                                                                                            | Y         | Y               | Y               | N               |          |
| Short Physical Performance Battery (SPPB)                                                                                                                                             | Y         | Y               | Y               | N               |          |
| Jamar hand dynamometer                                                                                                                                                                | Y         | Y               | Y               | N               |          |
| <b>Body composition</b>                                                                                                                                                               |           |                 |                 |                 |          |
| Height and weight are measured and BMI is calculated                                                                                                                                  | Y         | Y               | Y               | Y               |          |
| <b>Fracture risk</b>                                                                                                                                                                  |           |                 |                 |                 | S        |
| World Health Organization Fracture Risk Assessment Tool (FRAX)                                                                                                                        | Y         | Y               | Y               | Y               |          |
| <b>Cardiovascular condition</b>                                                                                                                                                       |           |                 |                 |                 |          |
| New York Heart Association functional class (NYHA)                                                                                                                                    | Y         | Y               | Y               | Y               |          |
| Orthostatic test                                                                                                                                                                      | Y         | Y               | Y               | N               |          |
| <b>Self-reported physical ability</b>                                                                                                                                                 |           |                 |                 |                 |          |
| Determined by asking                                                                                                                                                                  | Y         | Y               | Y               | Y               |          |
| <b>Mobility difficulty</b>                                                                                                                                                            |           |                 |                 |                 |          |
| Structured interview                                                                                                                                                                  | Y         | Y               | Y               | Y               |          |
| <b>Need of mobility assistive devices</b>                                                                                                                                             |           |                 |                 |                 |          |
| Determined by asking                                                                                                                                                                  | Y         | Y               | Y               | Y               |          |
| <b>Living arrangements</b>                                                                                                                                                            |           |                 |                 |                 | S        |
| Determined by asking                                                                                                                                                                  | Y         | Y               | Y               | Y               |          |
| <b>Questionnaire-based assessments</b>                                                                                                                                                | <b>BL</b> | <b>12-month</b> | <b>24-month</b> | <b>48-month</b> |          |
| <b>Life space mobility</b>                                                                                                                                                            |           |                 |                 |                 | <b>P</b> |
| Life-space mobility assessment (LSA)                                                                                                                                                  | Y         | Y               | Y               | Y               |          |
| <b>Balance confidence</b>                                                                                                                                                             |           |                 |                 |                 | S        |
| Activities-specific Balance Confidence scale (ABC)                                                                                                                                    | Y         | Y               | Y               | Y               |          |
| <b>Fear of falling</b>                                                                                                                                                                |           |                 |                 |                 | S        |
| Determined by asking and by Visual Analogue Scale (VAS)                                                                                                                               | Y         | Y               | Y               | Y               |          |
| <b>Quality of life (QOL)</b>                                                                                                                                                          |           |                 |                 |                 | S        |
| World Health Organization Quality of Life (WHOQOL) questionnaire                                                                                                                      | Y         | Y               | Y               | Y               |          |
| <b>Cognitive status</b>                                                                                                                                                               |           |                 |                 |                 | S        |
| Mini-Mental State Examination (MMSE)                                                                                                                                                  | Y         | Y               | Y               | Y               |          |
| <b>Depressive mood</b>                                                                                                                                                                |           |                 |                 |                 | S        |
| Geriatric Depression Scale (GDS-15)                                                                                                                                                   | Y         | Y               | Y               | Y               |          |
| <b>Alcohol consumption</b>                                                                                                                                                            |           |                 |                 |                 |          |
| The Alcohol Use Disorders Identification Test (AUDIT)                                                                                                                                 | Y         | Y               | Y               | Y               |          |

BL=baseline, O=outcome, N=no, Y=yes, P=primary, S=secondary

1  
2  
3 *Life-space mobility Assessment (LSA)* is a validated questionnaire, which measures the size of  
4 the area that a person has moved around in during the 4 weeks preceding the assessment,[2]. It  
5 correlates with observed physical performance and self-reported function,[2]. For each level of  
6 life-space (bedroom, other rooms, outside home, neighbourhood, town, beyond town) persons  
7 are asked how many days within a week they attained that level of life-space and whether they  
8 need help from another person or from assistive devices. A composite measure of life-space  
9 combines the components of life-space level attained, degree of independence, and frequency of  
10 attainment,[3].  
11  
12  
13  
14  
15  
16

### 17 ***Secondary outcomes***

18  
19  
20 A number of secondary outcome measures will be assessed to clarify potential mechanism  
21 underlying any reduction in fall rates during the trial, and to determine to what extent the training  
22 transfers to other important outcomes.  
23  
24  
25

26 *Physical activity (PA)*: The Finnish Hookie AM 20 triaxial accelerometer will be used to  
27 measure all PA over a 7-day period. The Hookie AM 20 device and related data analyses is  
28 based on the UKK Institute's algorithms which has been used in three large Finnish population-  
29 based cohort studies,[29, 30] and in older community dwelling individuals,[31]. A PA and  
30 exercise diary will also be used during the first 24 months' period of the study. Self-reported PA  
31 will also be quantified using the scale by Grimby,[32] with slight modifications,[33].  
32  
33  
34  
35  
36

37 *Physical performance*: An experienced research physiotherapist will conduct all physical  
38 performance tests, including the Timed Up and Go-test (TUG),[34] and Short Physical  
39 Performance Battery (SPPB),[35]. Handgrip strength from the dominant arm will be assessed  
40 using the Jamar hand dynamometer,[36].  
41  
42  
43  
44

45 *A fall indicator variable* (yes/no) will be formed and *fall-induced injuries* will be assessed based  
46 on diaries filled daily and returned each month until 24-months after the baseline. Hospital  
47 registers will also be used to verify severe injuries during the intervention and follow-up.  
48  
49

50 *Health-related quality of life* will be assessed using the World Health Organization Quality of  
51 Life (WHOQOL) 26-item short version questionnaire, which includes questions related to  
52 physical health, psychological health, social relationships and environment,[37]. *Living-*  
53 *arrangements* will be determined by interview. *Fracture risk* will be assessed by WHO Fracture  
54 Risk Assessment Tool (FRAX) via interview. The FRAX algorithms give the 10-year probability  
55 of hip fracture and a major osteoporotic fracture (clinical spine, forearm, hip or shoulder  
56 fracture),[38].  
57  
58  
59  
60



1  
2  
3 *Depressive mood* will be assessed using the Geriatric Depression Scale (GDS-15),[39].  
4 Participants who achieve 6 points or more on GDS-15 test will be referred to their physician for  
5 follow up. *Cognitive status* will be assessed via the Mini-Mental State Examination  
6 (MMSE),[21]. Participants who score 21 points or less in MMSE are excluded and referred to a  
7 physician appointment.  
8  
9

10  
11  
12 *Balance confidence* will be evaluated using the Activities-specific Balance Confidence scale  
13 (ABC),[40]. *Fear of falling* will be assessed (yes/no) and measured by the Visual Analogue  
14 Scale (VAS),[41]. A 100-mm long line will be used with the left end of the line (0 mm)  
15 representing “no fear” and the right end (100 mm) “extreme fear”.  
16  
17  
18

### 19 ***Other variables***

20  
21  
22 During the health examination, the research nurse will measure height and weight using standard  
23 procedures. Body mass index will be calculated as body weight (kg)/height (m) squared. The  
24 research nurse will also ask about any chronic and geriatric conditions, prescription  
25 medication(s) and the presence of any *cardiovascular condition* using New York Heart  
26 Association functional class (NYHA),[42] and perform an orthostatic test,[43]. *Alcohol*  
27 *consumption* will be assessed by the AUDIT-C tool and additionally by AUDIT if the AUDIT-C  
28 score is 6 or more among men and 5 or more among women,[22]. If the AUDIT score is 15 or  
29 more, participants will be excluded and referred to a health care practitioner.  
30  
31  
32

33  
34  
35 *Self-reported physical ability* will be determined via interview and asking participants: “How  
36 would you describe your physical ability?” Options are: 1) excellent, 2) good, 3) average, and 4)  
37 poor. *Need of mobility assistive devices* will also be determined via interview. *Mobility difficulty*  
38 will be assessed using a structured interview described earlier (see participant eligibility). As an  
39 outcome measure of *adherence*, we utilize the average number and duration of exercise sessions  
40 and total number and duration of exercise sessions based on daily completed and monthly  
41 returned PA and exercise diaries. In addition, *perceived exertion* will be assessed using the  
42 modified Borg Rating of Perceived Exertion (RPE) scale (range 0-10),[44].  
43  
44  
45  
46  
47  
48  
49

50  
51 *Demographics* include age, sex, marital status, education, and more recent occupation, as well as  
52 diet, use of spectacles, and smoking habits and whether participants have any problems related to  
53 vision and hearing, will be determined by interview. *Previous falls* will also be asked at baseline:  
54 “Have you fallen (and if so, how many times) during the previous year/6 months/month (without  
55 substantial external force) and did you injure yourself? *Adverse events* due to interventions are  
56 assessed by daily completed and monthly returned diaries and telephone interviews.  
57  
58  
59  
60

## Statistical methods

### *Pretrial power calculations*

We estimated the minimum required sample size in a simulation model including the continuous and count outcomes and the mutual correlation estimated via normally distributed random effects. Sample size estimation accounted for the multiple testing and the correlation between outcomes,[45]. Based on previous research,[16], we assumed that the control group would have a fall incidence of 131 per 100 person-years and the corresponding rate in the intervention group would be 118 per 100 person-years, which corresponds to a modest relative risk reduction of about 10% in favor of the intervention group. To allow some over-dispersion in the fall count, the normally distributed random effect variance was set at 0.3. Based on data from the Life-Space Mobility in Old Age (LISPE) study,[46], we set the mean at 64.0 (SD = 20.6) for the life-space mobility score, which was increased to 70.4 in the intervention group during the follow-up representing a relative increase of 10%. To obtain a conservative sample size estimate the random effect correlation was set at the low value 0.10. The simulation studies were based on 1000 replications of the model parameters. To find the likelihood ratio test statistic significant at 5% significance level for the above mean difference and risk ratio simultaneously, power of 80% was reached with a sample size of 346 based on equal allocation of subjects into the control and intervention groups. To account for 30% attrition, the sample size was increased to 450 (225 in each group).

### *Statistical analyses*

All statistical analyses will be conducted using the Mplus software and IBM SPSS software package version 24 (IBM Corp, Armonk, New York). We will analyze the data on an intention-to-treat basis, using the data from all randomized participants despite the protocol adherence and independent of the sponsor and competing interest. Follow-up time for falls, fallers and fall-induced injuries including fractures will be calculated from the day when participant started the intervention to the end of the 24-month intervention + 24-month follow-up or withdrawal from study.

The *primary outcome analysis* is a likelihood ratio test assessing simultaneously changes in the ratio of falls rates and the difference in rate changes in the LSA outcome. The test is based on a model of the fall outcome in a negative binomial regression model, where a random effect is used to account for likely over dispersion in the fall count distribution and the intraclass correlation of the measurement time points. Descriptive information is calculated as incidence

1  
2  
3 rates of falls, fallers, multiple fallers and fall-induced injuries (including fractures) per 100  
4 person-years. Proportion of fallers between groups will be reported using incidence rate ratio  
5 statistics.  
6  
7

8  
9 *Ancillary analysis* using causal modelling will be conducted to establish intervention effects in  
10 people with greater adherence (per protocol analysis). Covariance analysis will be used to  
11 analyze between group-differences in other continuous variables and general linear models will  
12 be utilized to assess the effect of group allocation on continuous secondary outcome measures.  
13  
14 Logistic regression models will be used to compare the two intervention groups on dichotomous  
15 outcome measures. *The explanatory factors of exercise adherence* will be investigated in a  
16 longitudinal path model enabling the linking data from individual characteristics to intervention  
17 effectiveness. Directed acyclic graphs are used to establish theoretical model relationships that  
18 serve as basis for model development with observed data. Additionally, we model physical  
19 activity trajectories and investigate individual variability among the trajectories.  
20  
21

22  
23 *Economic analyses* will be approached from the perspective of the community health care  
24 provider. The health outcome measure will be cost per fall prevented over the study duration.  
25  
26 Costs will include intervention costs as well as fall-induced health care and community service  
27 costs. Cost-utility is based on quality-adjusted life years (QALY) gained, where quality is  
28 measured at 12, 24 and 48 months with the WHO quality of life (WHOQoL) index. Using mean  
29 costs and QoL in each treatment arm, the intervention cost effectiveness will be assessed by  
30 comparing the intervention incremental cost per a prevented fall and incremental cost per QALY  
31 gained to those in the control group. The probability that the intervention is cost effective will be  
32 computed based on bootstrapping the incremental cost-effectiveness ratio as described in,[47].  
33  
34 Cost-effectiveness acceptability curves will be plotted for various levels of willingness to pay.  
35  
36

37  
38 Where missing data is generated through the missing-at-random (MAR) mechanism, we will  
39 employ the standard MAR-based likelihood specification in Mplus,[48]. A custom missing data  
40 model will be used when missing data is generated by a non-random mechanism.  
41  
42  
43  
44

## 45 46 47 48 49 50 51 52 53 **DATA MANAGEMENT**

54  
55 Once a participant has been randomly allocated, every effort will be made to follow-up the  
56 participant on outcome measures until the end of the study period. Any participants who  
57 discontinue or deviate from the intervention protocols or fail to complete the exercise and falls  
58 diary will still be invited to complete the 12 and/or 24 follow-up measurements. Participant data  
59  
60

1  
2  
3 are stored on a secure database in accordance with the General Data Protection Regulations  
4 (2018). All collected data will be coded with unique identification numbers and stored centrally  
5 on the secure database of the University of Jyväskylä, a password-protected computer or in a  
6 locked filing cabinet in a secure office space, only accessible by a limited number of people. The  
7 questionnaires and forms will be checked for completeness and congruity instantly when filled  
8 and/or received and again before data entry onto the database. Additionally, we will regularly  
9 check the data files for omissions and errors to ensure the data integrity. Trial documentation and  
10 data will be archived for at least 10 years after completion of the trial after which it will be  
11 destroyed. The data monitoring committee (DMC) consists of the research group members (see  
12 front page). Thus, it is not independent.  
13  
14  
15  
16  
17  
18  
19  
20  
21  
22

### 23 **TRIAL MONITORING**

24  
25  
26 A standard operation procedure has been written before launching the study and will be followed  
27 carefully throughout the study. Regular meetings will be organized for monitoring the quality of  
28 data collection. Senior researchers will carefully educate the personnel performing the  
29 measurements and the same staff will engage in the data collection throughout the study.  
30  
31  
32  
33  
34  
35

### 36 **ETHICS AND DISSEMINATION**

37  
38 The Ethics Committee of the Tampere University Hospital has approved the procedures and  
39 design of the trial (03/11/2015, ref: R15160). The COSMOS study is carried out according to the  
40 guidelines of good scientific practice (Declaration of Helsinki). Any protocol modifications will  
41 be reported to the Ethical Committee and to the trial registry (ISRCTN). Participants are insured  
42 for intervention related harms. Moreover, we will record any adverse events from either of the  
43 interventions and report serious adverse events to the ethics committee. Participants may  
44 withdraw from the study for any reason at any time.  
45  
46  
47  
48  
49  
50

51 The research team is committed to full disclosure of the results of the trial. Findings will be  
52 reported in accordance with the CONSORT guidelines in peer reviewed journals and  
53 international scientific conferences. The funder will have no role in the analysis or interpretation  
54 of the trial results.  
55  
56  
57  
58  
59  
60

## PATIENT AND PUBLIC INVOLVEMENT STATEMENT

We did not directly include patient and public involvement in this study, but we will develop the counselling program based on participant feedback.

## ACKNOWLEDGMENTS

The authors would like to thank all the trial participants. We thank also the research physiotherapists: Elina Ahlstedt-Kivelä, Paju Becker, and Eerika Tiirikainen as well as the research nurses: Anneli Peltonen, Kirsi Perkkiö, Tiina Raittinen, Laura-Emilia Vainio, and Arja Ylä-Rakkola for their valuable contribution. Additionally, authors would like to thank physician Jaakko Valvanne for his feedback on the health examination concept and psychologist Päivi Lappalainen for introducing the motivational interviewing technique to the study personnel. We thank statistician Markku Kauppinen, who created the random allocation protocol. We thank also Sirpa Ellala, Paula Pasanen-Aro, Maarit Pitkänen, Anne Santalahti, and Laura Tyyskänen at the City of Ylöjärvi for ongoing collaboration and Academy of Finland for funding the study.

## REFERENCES

- 1 Verbrugge LM, Jette AM. The disablement process, *Soc Sci Med* 1994;38:1-14.
- 2 Baker PS, Bodner EV, Allman RM. Measuring life-space mobility in community-dwelling older adults, *J Am Geriatr Soc* 2003;51:1610-4 [published Online First: Nov].
- 3 Peel C, Sawyer Baker P, Roth DL, et al. Assessing mobility in older adults: the UAB Study of Aging Life-Space Assessment, *Phys Ther* 2005;85:1008-119 [published Online First: Oct].
- 4 Feskanich D, Willett W, Colditz G. Walking and leisure-time activity and risk of hip fracture in postmenopausal women, *JAMA* 2002;288:2300-6 [published Online First: Nov 13,].
- 5 Michaëlsson K, Olofsson H, Jensevik K, et al. Leisure physical activity and the risk of fracture in men, *PLoS Med* 2007;4:e199 doi:10.1371/journal.pmed.0040199 [published Online First: Jun].
- 6 Cauley JA, Harrison SL, Cawthon PM, et al. Objective measures of physical activity, fractures and falls: the osteoporotic fractures in men study, *J Am Geriatr Soc* 2013;61:1080-8 doi:10.1111/jgs.12326 [published Online First: Jul].
- 7 Morseth B, Ahmed LA, Bjørnerem Å, et al. Leisure time physical activity and risk of non-vertebral fracture in men and women aged 55 years and older: the Tromsø Study, *Eur J Epidemiol* 2012;27:463-71 doi:10.1007/s10654-012-9665-y [published Online First: Jun].
- 8 Feskanich D, Flint AJ, Willett WC. Physical activity and inactivity and risk of hip fractures in men, *Am J Public Health* 2014;104:75 doi:10.2105/AJPH.2013.301667 [published Online First: Apr].
- 9 Appleby PN, Allen NE, Roddam AW, et al. Physical activity and fracture risk: a prospective study of 1898 incident fractures among 34,696 British men and women, *J Bone Miner Metab* 2008;26:191-8 doi:10.1007/s00774-007-0806-4.
- 10 Rikkonen T, Salovaara K, Sirola J, et al. Physical activity slows femoral bone loss but promotes wrist fractures in postmenopausal women: a 15-year follow-up of the OSTPRE study, *J Bone Miner Res* 2010;25:2332-40 doi:10.1002/jbmr.143 [published Online First: Nov].
- 11 Nikander R, Gagnon C, Dunstan DW, et al. Frequent walking, but not total physical activity, is associated with increased fracture incidence: a 5-year follow-up of an Australian population-based prospective study (AusDiab), *J Bone Miner Res* 2011;26:1638-47 doi:10.1002/jbmr.363 [published Online First: Jul].
- 12 Gillespie LD, Robertson MC, Gillespie WJ, et al. Interventions for preventing falls in older people living in the community, *Cochrane Database Syst Rev* 2012:CD007146 doi:10.1002/14651858.CD007146.pub3 [published Online First: Sep 12,].
- 13 El-Khoury F, Cassou B, Charles M, et al. The effect of fall prevention exercise programmes on fall induced injuries in community dwelling older adults: systematic review and meta-analysis of randomised controlled trials, *BMJ* 2013;347:f6234 [published Online First: Oct 29,].

- 1  
2  
3 14 Guirguis-Blake JM, Michael YL, Perdue LA, et al. Interventions to Prevent Falls in Older  
4 Adults: Updated Evidence Report and Systematic Review for the US Preventive Services Task  
5 Force, *JAMA* 2018;319:1705-16 doi:10.1001/jama.2017.21962 [published Online First: 04 24,].  
6  
7  
8 15 Gillespie LD, Robertson MC, Gillespie WJ, et al. Interventions for preventing falls in older  
9 people living in the community, *Cochrane Database Syst Rev* 2012;9:CD007146.  
10  
11 16 Palvanen M, Kannus P, Piirtola M, et al. Effectiveness of the Chaos Falls Clinic in preventing  
12 falls and injuries of home-dwelling older adults: a randomised controlled trial, *Injury*  
13 2014;45:265-71 doi:10.1016/j.injury.2013.03.010 [published Online First: Jan].  
14  
15  
16 17 Kork A, Kivimäki R, Rimpelä A, et al. Terveyskioski palveluinnovaationa - Lahden  
17 terveystioski- hankkeen väliarviointi (Vaihe II)&nbsp; Sitra 2011:35.  
18  
19  
20 18 Kork A, Vakkuri J. Matalan kynnyksen palvelumalli  
21 perusturvan palvelualueella. *Sitra* 2013:23.  
22  
23 19 Chan A, Tetzlaff JM, Altman DG, et al. SPIRIT 2013 statement: defining standard protocol  
24 items for clinical trials, *Ann Intern Med* 2013;158:200-7 doi:10.7326/0003-4819-158-3-  
25 201302050-00583 [published Online First: Feb 05,].  
26  
27 20 Mänty M, Heinonen A, Leinonen R, et al. Construct and predictive validity of a self-reported  
28 measure of preclinical mobility limitation, *Arch Phys Med Rehabil* 2007;88:1108-13.  
29  
30  
31 21 Folstein MF, Folstein SE, McHugh PR. "Mini-mental state". A practical method for grading  
32 the cognitive state of patients for the clinician, *J Psychiatr Res* 1975;12:189-98.  
33  
34 22 Saunders JB, Aasland OG, Babor TF, et al. Development of the Alcohol Use Disorders  
35 Identification Test (AUDIT): WHO Collaborative Project on Early Detection of Persons with  
36 Harmful Alcohol Consumption--II, *Addiction* 1993;88:791-804 [published Online First: Jun].  
37  
38  
39 23 Rollnick S, Miller WR. What is Motivational Interviewing? *Behavioural and Cognitive*  
40 *Psychotherapy* 1995;23:325-34 doi:10.1017/S135246580001643X [published Online First: /10].  
41  
42  
43 24 Bandura A. Social Foundations of Thoughts and Action: A Social Cognitive Theory.&nbsp;.  
44 Englewood Cliffs, New Jersey: Prentice-Hall 1986.  
45  
46 25 Prochaska JO, DiClemente CC. Stages of change in the modification of problem behaviors,  
47 *Prog Behav Modif* 1992;28:183-218.  
48  
49  
50 26 Pajala S. IKINÄ-opas. *the Finnish National Institute for Health and Welfare* 2018:183.  
51  
52 27 Gardner MM, Buchner DM, Robertson MC, et al. Practical implementation of an exercise-  
53 based falls prevention programme, *Age Ageing* 2001;30:77-83 [published Online First: Jan].  
54  
55 28 Hauer K, Lamb SE, Jorstad EC, et al. Systematic review of definitions and methods of  
56 measuring falls in randomised controlled fall prevention trials, *Age Ageing* 2006;35:5-10  
57 doi:35/1/5 [pii] [published Online First: January 01].  
58  
59  
60

- 1  
2  
3 29 Husu P, Suni J, Vaha-Ypya H, et al. Objectively measured sedentary behavior and physical  
4 activity in a sample of Finnish adults: a cross-sectional study, *BMC Public Health* 2016;16:y  
5 doi:10.1186/s12889-016-3591-y [doi] [published Online First: September 01].  
6  
7  
8 30 Hukkanen H, Husu P, Sievanen H, et al. Aerobic physical activity assessed with  
9 accelerometer, diary, questionnaire, and interview in a Finnish population sample, *Scand J Med*  
10 *Sci Sports* 2018;28:2196-206 doi:10.1111/sms.13244 [doi] [published Online First: October 01].  
11  
12  
13 31 Waller K, Vaha-Ypya H, Tormakangas T, et al. Long-term leisure-time physical activity and  
14 other health habits as predictors of objectively monitored late-life physical activity - A 40-year  
15 twin study, *Sci Rep* 2018;8:7 doi:10.1038/s41598-018-27704-7 [doi] [published Online First:  
16 June 20].  
17  
18  
19 32 Grimby G. Physical activity and muscle training in the elderly, *Acta Med Scand Suppl*  
20 1986;711:233-7.  
21  
22  
23 33 Rasinaho M, Hirvensalo M, Törmäkangas T, et al. Effect of physical activity counseling on  
24 physical activity of older people in Finland (ISRCTN 07330512), *Health Promot Int*  
25 2012;27:463-74 doi:10.1093/heapro/dar057 [published Online First: Dec].  
26  
27  
28 34 Podsiadlo D, Richardson S. The timed "Up & Go": a test of basic functional mobility for frail  
29 elderly persons, *J Am Geriatr Soc* 1991;39:142-8.  
30  
31  
32 35 Guralnik JM, Simonsick EM, Ferrucci L, et al. A short physical performance battery  
33 assessing lower extremity function: association with self-reported disability and prediction of  
34 mortality and nursing home admission, *J Gerontol* 1994;49:85.  
35  
36  
37 36 Mathiowetz V, Kashman N, Volland G, et al. Grip and pinch strength: normative data for  
38 adults, *Arch Phys Med Rehabil* 1985;66:69-74 [published Online First: Feb].  
39  
40  
41 37 Anonymous . Development of the World Health Organization WHOQOL-BREF quality of  
42 life assessment. The WHOQOL Group, *Psychol Med* 1998;28:551-8 [published Online First:  
43 May].  
44  
45  
46 38 Kanis JA, Oden A, Johansson H, et al. FRAX and its applications to clinical practice, *Bone*  
47 2009;44:734-43 doi:10.1016/j.bone.2009.01.373 [published Online First: May].  
48  
49  
50 39 Sheikh JI, Yesavage JA, Brooks JO, et al. Proposed factor structure of the Geriatric  
51 Depression Scale, *Int Psychogeriatr* 1991;3:23-8.  
52  
53  
54 40 Powell LE, Myers AM. The Activities-specific Balance Confidence (ABC) Scale, *J Gerontol*  
55 *A Biol Sci Med Sci* 1995;50A:28.  
56  
57  
58 41 Huskisson EC. Measurement of pain, *Lancet* 1974;2:1127-31.  
59  
60  
61 42 Miller-Davis C, Marden S, Leidy NK. The New York Heart Association Classes and  
62 functional status: what are we really measuring? *Heart Lung* 2006;35:217-24  
63 doi:10.1016/j.hrtlng.2006.01.003 [published Online First: Jul-Aug].



- 1  
2  
3 43 Anonymous . Orthostatic Test, *Scandinavian Journal of Clinical and Laboratory*  
4 *Investigation* 1984;44:38-54 doi:10.1080/00365518409169138 [published Online First: January  
5 1,].  
6  
7  
8 44 Borg GA. Psychophysical bases of perceived exertion, *Med Sci Sports Exerc* 1982;14:377-81.  
9  
10 45 Moyé LA. Multiple Analyses in Clinical Trials: Fundamentals for Investigators. New York:  
11 Springer 2003.  
12  
13 46 Rantanen T, Portegijs E, Viljanen A, et al. Individual and environmental factors underlying  
14 life space of older people - study protocol and design of a cohort study on life-space mobility in  
15 old age (LISPE), *BMC Public Health* 2012;12:1018 doi:10.1186/1471-2458-12-1018 [published  
16 Online First: Nov 22,].  
17  
18  
19 47 Gray AM, Clarke PM, Wolstenholme JL, et al. Applied Methods of Cost-effectiveness  
20 Analysis in Healthcare. Oxford, New York: Oxford University Press 2011.  
21  
22  
23 48 Muthén LK, Muthén BO. Mplus user's guide: Statistical Analysis With Latent Variables. Los  
24 Angeles, CA: Muthén & Muthén 2009:850.  
25  
26  
27  
28  
29  
30  
31  
32  
33  
34  
35  
36  
37  
38  
39  
40  
41  
42  
43  
44  
45  
46  
47  
48  
49  
50  
51  
52  
53  
54  
55  
56  
57  
58  
59  
60

## **AUTHORS' CONTRIBUTIONS**

Authorship is based on the ICMJE Recommendations (2013). RN is the responsible investigator who conceived the study and will oversee the data collection. The study was conceived with input from TaR, RD, UK, TT, HS, PK, AH, SS, LK, TiR, and OT. JE and SK are responsible for managing the data collection. JE wrote this protocol manuscript, the final version of which all other authors have revised and provided input according to their area of expertise. All authors approved the final version of the manuscript.

## **FUNDING STATEMENT**

This work was supported by the Academy of Finland (grant number 289523).

## **COMPETING INTERESTS STATEMENT**

Riku Nikander, University of Jyväskylä and GeroCenter foundation, Jyväskylä Finland, is a co-owner of the Devisys oy, Tampere Finland, a company that produces anti-slip devices for winter conditions.

## **DATA AVAILABILITY STATEMENT**

De-identified participant data are available upon reasonable request from prof. Riku Nikander, riku.p.nikander@jyu.fi. Detailed IPD sharing statement is available at the ISRCTN registry (ISRCTN65406039).

## **TABLES AND FIGURES**

Table 1. Condensed trial registration data

Table 2. Content of the COSMOS 1 and 2 levels

Table 3. Outcome and other variables, methods and schedule of the assessments

Figure 1. Flow chart of the COSMOS study

Supplementary figure. Participant timeline

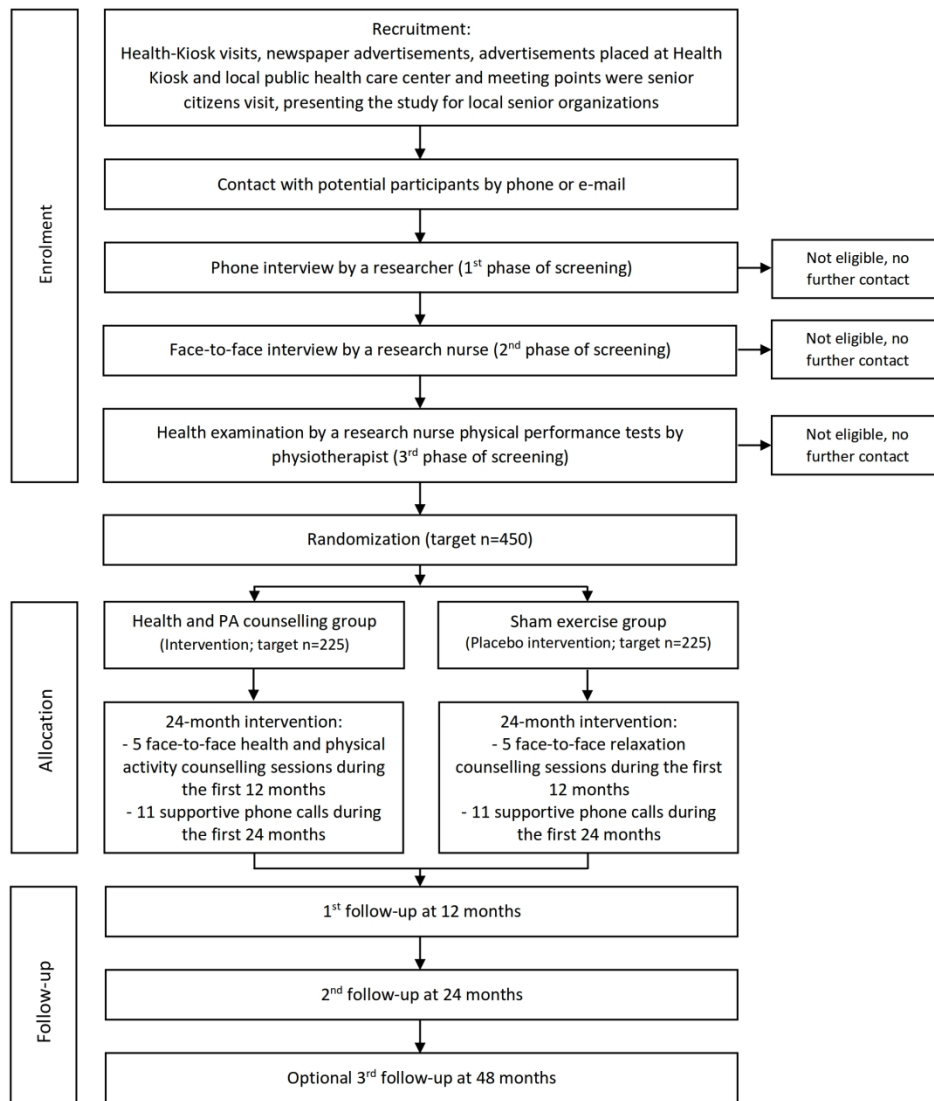

**Figure 1.** Flow chart of the COSMOS study, PA=physical activity

Flow chart of the COSMOS study

175x217mm (300 x 300 DPI)

1  
2  
3  
4  
5  
6  
7  
8  
9  
10  
11  
12  
13  
14  
15  
16  
17  
18  
19  
20  
21  
22  
23  
24  
25  
26  
27  
28  
29  
30  
31  
32  
33  
34  
35  
36  
37  
38  
39  
40  
41  
42  
43  
44  
45  
46  
47  
48  
49  
50  
51  
52  
53  
54  
55  
56  
57  
58  
59  
60

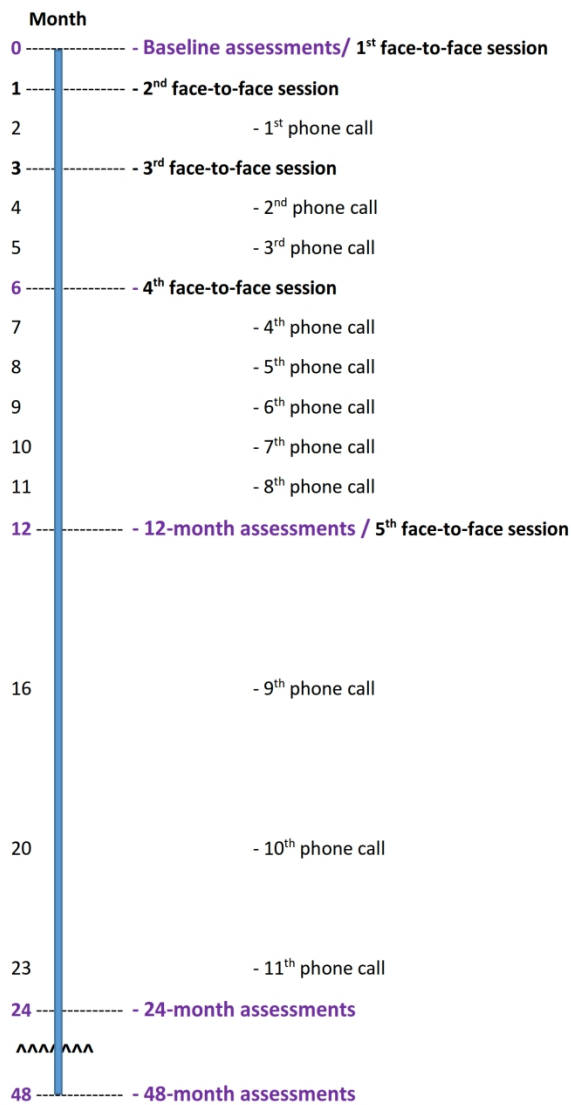

Supplementary figure. Participant timeline

Participant timeline

112x227mm (300 x 300 DPI)

# Reporting checklist for protocol of a clinical trial.

Based on the SPIRIT guidelines.

## Instructions to authors

Complete this checklist by entering the page numbers from your manuscript where readers will find each of the items listed below.

Your article may not currently address all the items on the checklist. Please modify your text to include the missing information. If you are certain that an item does not apply, please write "n/a" and provide a short explanation.

Upload your completed checklist as an extra file when you submit to a journal.

In your methods section, say that you used the SPIRIT reporting guidelines, and cite them as:

Chan A-W, Tetzlaff JM, Altman DG, Laupacis A, Gøtzsche PC, Krleža-Jerić K, Hróbjartsson A, Mann H, Dickersin K, Berlin J, Doré C, Parulekar W, Summerskill W, Groves T, Schulz K, Sox H, Rockhold FW, Rennie D, Moher D. SPIRIT 2013 Statement: Defining standard protocol items for clinical trials. *Ann Intern Med.* 2013;158(3):200-207

|                                             |                     | Reporting Item                                                                                               | Page Number |
|---------------------------------------------|---------------------|--------------------------------------------------------------------------------------------------------------|-------------|
| Title                                       | <a href="#">#1</a>  | Descriptive title identifying the study design, population, interventions, and, if applicable, trial acronym | 1           |
| Trial registration                          | <a href="#">#2a</a> | Trial identifier and registry name. If not yet registered, name of intended registry                         | 2,6,7       |
| Trial registration: data set                | <a href="#">#2b</a> | All items from the World Health Organization Trial Registration Data Set                                     | 6           |
| Protocol version                            | <a href="#">#3</a>  | Date and version identifier                                                                                  | 1           |
| Funding                                     | <a href="#">#4</a>  | Sources and types of financial, material, and other support                                                  | 6,23        |
| Roles and responsibilities: contributorship | <a href="#">#5a</a> | Names, affiliations, and roles of protocol contributors                                                      | 1,23        |
| Roles and responsibilities:                 | <a href="#">#5b</a> | Name and contact information for the trial sponsor                                                           | 6           |

|    |                      |                      |                                                              |        |
|----|----------------------|----------------------|--------------------------------------------------------------|--------|
| 1  | sponsor contact      |                      |                                                              |        |
| 2  | information          |                      |                                                              |        |
| 3  |                      |                      |                                                              |        |
| 4  | Roles and            | <a href="#">#5c</a>  | Role of study sponsor and funders, if any, in study design;  | 16-17  |
| 5  | responsibilities:    |                      | collection, management, analysis, and interpretation of      |        |
| 6  | sponsor and funder   |                      | data; writing of the report; and the decision to submit the  |        |
| 7  |                      |                      | report for publication, including whether they will have     |        |
| 8  |                      |                      | ultimate authority over any of these activities              |        |
| 9  |                      |                      |                                                              |        |
| 10 |                      |                      |                                                              |        |
| 11 |                      |                      |                                                              |        |
| 12 | Roles and            | <a href="#">#5d</a>  | Composition, roles, and responsibilities of the coordinating | 16-17  |
| 13 | responsibilities:    |                      | centre, steering committee, endpoint adjudication            |        |
| 14 | committees           |                      | committee, data management team, and other individuals       |        |
| 15 |                      |                      | or groups overseeing the trial, if applicable (see Item 21a  |        |
| 16 |                      |                      | for data monitoring committee)                               |        |
| 17 |                      |                      |                                                              |        |
| 18 |                      |                      |                                                              |        |
| 19 |                      |                      |                                                              |        |
| 20 | Background and       | <a href="#">#6a</a>  | Description of research question and justification for       | 2-5    |
| 21 | rationale            |                      | undertaking the trial, including summary of relevant         |        |
| 22 |                      |                      | studies (published and unpublished) examining benefits       |        |
| 23 |                      |                      | and harms for each intervention                              |        |
| 24 |                      |                      |                                                              |        |
| 25 |                      |                      |                                                              |        |
| 26 |                      |                      |                                                              |        |
| 27 | Background and       | <a href="#">#6b</a>  | Explanation for choice of comparators                        | 11     |
| 28 | rationale: choice of |                      |                                                              |        |
| 29 | comparators          |                      |                                                              |        |
| 30 |                      |                      |                                                              |        |
| 31 |                      |                      |                                                              |        |
| 32 | Objectives           | <a href="#">#7</a>   | Specific objectives or hypotheses                            | 5      |
| 33 |                      |                      |                                                              |        |
| 34 |                      |                      |                                                              |        |
| 35 | Trial design         | <a href="#">#8</a>   | Description of trial design including type of trial (eg,     | 6,7    |
| 36 |                      |                      | parallel group, crossover, factorial, single group),         |        |
| 37 |                      |                      | allocation ratio, and framework (eg, superiority,            |        |
| 38 |                      |                      | equivalence, non-inferiority, exploratory)                   |        |
| 39 |                      |                      |                                                              |        |
| 40 |                      |                      |                                                              |        |
| 41 |                      |                      |                                                              |        |
| 42 | Study setting        | <a href="#">#9</a>   | Description of study settings (eg, community clinic,         | 6,7    |
| 43 |                      |                      | academic hospital) and list of countries where data will be  |        |
| 44 |                      |                      | collected. Reference to where list of study sites can be     |        |
| 45 |                      |                      | obtained                                                     |        |
| 46 |                      |                      |                                                              |        |
| 47 |                      |                      |                                                              |        |
| 48 | Eligibility criteria | <a href="#">#10</a>  | Inclusion and exclusion criteria for participants. If        | 6,7-8  |
| 49 |                      |                      | applicable, eligibility criteria for study centres and       |        |
| 50 |                      |                      | individuals who will perform the interventions (eg,          |        |
| 51 |                      |                      | surgeons, psychotherapists)                                  |        |
| 52 |                      |                      |                                                              |        |
| 53 |                      |                      |                                                              |        |
| 54 |                      |                      |                                                              |        |
| 55 | Interventions:       | <a href="#">#11a</a> | Interventions for each group with sufficient detail to allow | 6,9-11 |
| 56 | description          |                      | replication, including how and when they will be             |        |
| 57 |                      |                      | administered                                                 |        |
| 58 |                      |                      |                                                              |        |
| 59 |                      |                      |                                                              |        |
| 60 |                      |                      |                                                              |        |

|    |                      |                      |                                                             |          |
|----|----------------------|----------------------|-------------------------------------------------------------|----------|
| 1  | Interventions:       | <a href="#">#11b</a> | Criteria for discontinuing or modifying allocated           | 9-11     |
| 2  | modifications        |                      | interventions for a given trial participant (eg, drug dose  |          |
| 3  |                      |                      | change in response to harms, participant request, or        |          |
| 4  |                      |                      | improving / worsening disease)                              |          |
| 5  |                      |                      |                                                             |          |
| 6  |                      |                      |                                                             |          |
| 7  |                      |                      |                                                             |          |
| 8  | Interventions:       | <a href="#">#11c</a> | Strategies to improve adherence to intervention protocols,  | 9-11     |
| 9  | adherence            |                      | and any procedures for monitoring adherence (eg, drug       |          |
| 10 |                      |                      | tablet return; laboratory tests)                            |          |
| 11 |                      |                      |                                                             |          |
| 12 |                      |                      |                                                             |          |
| 13 | Interventions:       | <a href="#">#11d</a> | Relevant concomitant care and interventions that are        | 9-11     |
| 14 | concomitant care     |                      | permitted or prohibited during the trial                    |          |
| 15 |                      |                      |                                                             |          |
| 16 |                      |                      |                                                             |          |
| 17 | Outcomes             | <a href="#">#12</a>  | Primary, secondary, and other outcomes, including the       | 11-14    |
| 18 |                      |                      | specific measurement variable (eg, systolic blood           |          |
| 19 |                      |                      | pressure), analysis metric (eg, change from baseline, final |          |
| 20 |                      |                      | value, time to event), method of aggregation (eg, median,   |          |
| 21 |                      |                      | proportion), and time point for each outcome. Explanation   |          |
| 22 |                      |                      | of the clinical relevance of chosen efficacy and harm       |          |
| 23 |                      |                      | outcomes is strongly recommended                            |          |
| 24 |                      |                      |                                                             |          |
| 25 |                      |                      |                                                             |          |
| 26 |                      |                      |                                                             |          |
| 27 |                      |                      |                                                             |          |
| 28 | Participant timeline | <a href="#">#13</a>  | Time schedule of enrolment, interventions (including any    | 9,       |
| 29 |                      |                      | run-ins and washouts), assessments, and visits for          |          |
| 30 |                      |                      | participants. A schematic diagram is highly recommended     | Figure 2 |
| 31 |                      |                      | (see Figure)                                                |          |
| 32 |                      |                      |                                                             |          |
| 33 |                      |                      |                                                             |          |
| 34 |                      |                      |                                                             |          |
| 35 | Sample size          | <a href="#">#14</a>  | Estimated number of participants needed to achieve study    | 15       |
| 36 |                      |                      | objectives and how it was determined, including clinical    |          |
| 37 |                      |                      | and statistical assumptions supporting any sample size      |          |
| 38 |                      |                      | calculations                                                |          |
| 39 |                      |                      |                                                             |          |
| 40 |                      |                      |                                                             |          |
| 41 |                      |                      |                                                             |          |
| 42 | Recruitment          | <a href="#">#15</a>  | Strategies for achieving adequate participant enrolment to  | 8        |
| 43 |                      |                      | reach target sample size                                    |          |
| 44 |                      |                      |                                                             |          |
| 45 |                      |                      |                                                             |          |
| 46 | Allocation: sequence | <a href="#">#16a</a> | Method of generating the allocation sequence (eg,           | 8        |
| 47 | generation           |                      | computer-generated random numbers), and list of any         |          |
| 48 |                      |                      | factors for stratification. To reduce predictability of a   |          |
| 49 |                      |                      | random sequence, details of any planned restriction (eg,    |          |
| 50 |                      |                      | blocking) should be provided in a separate document that    |          |
| 51 |                      |                      | is unavailable to those who enrol participants or assign    |          |
| 52 |                      |                      | interventions                                               |          |
| 53 |                      |                      |                                                             |          |
| 54 |                      |                      |                                                             |          |
| 55 |                      |                      |                                                             |          |
| 56 |                      |                      |                                                             |          |
| 57 |                      |                      |                                                             |          |
| 58 |                      |                      |                                                             |          |
| 59 |                      |                      |                                                             |          |
| 60 |                      |                      |                                                             |          |

|    |                        |                      |                                                                |       |
|----|------------------------|----------------------|----------------------------------------------------------------|-------|
| 1  | Allocation             | <a href="#">#16b</a> | Mechanism of implementing the allocation sequence (eg,         | 8     |
| 2  | concealment            |                      | central telephone; sequentially numbered, opaque, sealed       |       |
| 3  | mechanism              |                      | envelopes), describing any steps to conceal the sequence       |       |
| 4  |                        |                      | until interventions are assigned                               |       |
| 5  |                        |                      |                                                                |       |
| 6  |                        |                      |                                                                |       |
| 7  |                        |                      |                                                                |       |
| 8  | Allocation:            | <a href="#">#16c</a> | Who will generate the allocation sequence, who will enrol      | 8     |
| 9  | implementation         |                      | participants, and who will assign participants to              |       |
| 10 |                        |                      | interventions                                                  |       |
| 11 |                        |                      |                                                                |       |
| 12 |                        |                      |                                                                |       |
| 13 | Blinding (masking)     | <a href="#">#17a</a> | Who will be blinded after assignment to interventions (eg,     | 8     |
| 14 |                        |                      | trial participants, care providers, outcome assessors, data    |       |
| 15 |                        |                      | analysts), and how                                             |       |
| 16 |                        |                      |                                                                |       |
| 17 |                        |                      |                                                                |       |
| 18 | Blinding (masking):    | <a href="#">#17b</a> | If blinded, circumstances under which unblinding is            | n/a   |
| 19 | emergency              |                      | permissible, and procedure for revealing a participant's       |       |
| 20 | unblinding             |                      | allocated intervention during the trial                        |       |
| 21 |                        |                      |                                                                |       |
| 22 |                        |                      |                                                                |       |
| 23 |                        |                      |                                                                |       |
| 24 | Data collection plan   | <a href="#">#18a</a> | Plans for assessment and collection of outcome, baseline,      | 16-17 |
| 25 |                        |                      | and other trial data, including any related processes to       |       |
| 26 |                        |                      | promote data quality (eg, duplicate measurements,              |       |
| 27 |                        |                      | training of assessors) and a description of study              |       |
| 28 |                        |                      | instruments (eg, questionnaires, laboratory tests) along       |       |
| 29 |                        |                      | with their reliability and validity, if known. Reference to    |       |
| 30 |                        |                      | where data collection forms can be found, if not in the        |       |
| 31 |                        |                      | protocol                                                       |       |
| 32 |                        |                      |                                                                |       |
| 33 |                        |                      |                                                                |       |
| 34 |                        |                      |                                                                |       |
| 35 |                        |                      |                                                                |       |
| 36 | Data collection plan:  | <a href="#">#18b</a> | Plans to promote participant retention and complete            | 16-17 |
| 37 | retention              |                      | follow-up, including list of any outcome data to be            |       |
| 38 |                        |                      | collected for participants who discontinue or deviate from     |       |
| 39 |                        |                      | intervention protocols                                         |       |
| 40 |                        |                      |                                                                |       |
| 41 |                        |                      |                                                                |       |
| 42 |                        |                      |                                                                |       |
| 43 | Data management        | <a href="#">#19</a>  | Plans for data entry, coding, security, and storage,           | 16-17 |
| 44 |                        |                      | including any related processes to promote data quality        |       |
| 45 |                        |                      | (eg, double data entry; range checks for data values).         |       |
| 46 |                        |                      | Reference to where details of data management                  |       |
| 47 |                        |                      | procedures can be found, if not in the protocol                |       |
| 48 |                        |                      |                                                                |       |
| 49 |                        |                      |                                                                |       |
| 50 |                        |                      |                                                                |       |
| 51 | Statistics: outcomes   | <a href="#">#20a</a> | Statistical methods for analysing primary and secondary        | 15-16 |
| 52 |                        |                      | outcomes. Reference to where other details of the              |       |
| 53 |                        |                      | statistical analysis plan can be found, if not in the protocol |       |
| 54 |                        |                      |                                                                |       |
| 55 |                        |                      |                                                                |       |
| 56 |                        |                      |                                                                |       |
| 57 | Statistics: additional | <a href="#">#20b</a> | Methods for any additional analyses (eg, subgroup and          | 16    |
| 58 | analyses               |                      | adjusted analyses)                                             |       |
| 59 |                        |                      |                                                                |       |
| 60 |                        |                      |                                                                |       |



|    |                      |                      |                                                              |       |
|----|----------------------|----------------------|--------------------------------------------------------------|-------|
| 1  | Statistics: analysis | <a href="#">#20c</a> | Definition of analysis population relating to protocol non-  | 16    |
| 2  | population and       |                      | adherence (eg, as randomised analysis), and any              |       |
| 3  | missing data         |                      | statistical methods to handle missing data (eg, multiple     |       |
| 4  |                      |                      | imputation)                                                  |       |
| 5  |                      |                      |                                                              |       |
| 6  |                      |                      |                                                              |       |
| 7  |                      |                      |                                                              |       |
| 8  | Data monitoring:     | <a href="#">#21a</a> | Composition of data monitoring committee (DMC);              | 16-17 |
| 9  | formal committee     |                      | summary of its role and reporting structure; statement of    |       |
| 10 |                      |                      | whether it is independent from the sponsor and competing     |       |
| 11 |                      |                      | interests; and reference to where further details about its  |       |
| 12 |                      |                      | charter can be found, if not in the protocol. Alternatively, |       |
| 13 |                      |                      | an explanation of why a DMC is not needed                    |       |
| 14 |                      |                      |                                                              |       |
| 15 |                      |                      |                                                              |       |
| 16 |                      |                      |                                                              |       |
| 17 |                      |                      |                                                              |       |
| 18 | Data monitoring:     | <a href="#">#21b</a> | Description of any interim analyses and stopping             | n/a   |
| 19 | interim analysis     |                      | guidelines, including who will have access to these interim  |       |
| 20 |                      |                      | results and make the final decision to terminate the trial   |       |
| 21 |                      |                      |                                                              |       |
| 22 |                      |                      |                                                              |       |
| 23 | Harms                | <a href="#">#22</a>  | Plans for collecting, assessing, reporting, and managing     | 17    |
| 24 |                      |                      | solicited and spontaneously reported adverse events and      |       |
| 25 |                      |                      | other unintended effects of trial interventions or trial     |       |
| 26 |                      |                      | conduct                                                      |       |
| 27 |                      |                      |                                                              |       |
| 28 |                      |                      |                                                              |       |
| 29 |                      |                      |                                                              |       |
| 30 | Auditing             | <a href="#">#23</a>  | Frequency and procedures for auditing trial conduct, if      | 16-17 |
| 31 |                      |                      | any, and whether the process will be independent from        |       |
| 32 |                      |                      | investigators and the sponsor                                |       |
| 33 |                      |                      |                                                              |       |
| 34 |                      |                      |                                                              |       |
| 35 | Research ethics      | <a href="#">#24</a>  | Plans for seeking research ethics committee / institutional  | 2,17  |
| 36 | approval             |                      | review board (REC / IRB) approval                            |       |
| 37 |                      |                      |                                                              |       |
| 38 |                      |                      |                                                              |       |
| 39 | Protocol             | <a href="#">#25</a>  | Plans for communicating important protocol modifications     | 17    |
| 40 | amendments           |                      | (eg, changes to eligibility criteria, outcomes, analyses) to |       |
| 41 |                      |                      | relevant parties (eg, investigators, REC / IRBs, trial       |       |
| 42 |                      |                      | participants, trial registries, journals, regulators)        |       |
| 43 |                      |                      |                                                              |       |
| 44 |                      |                      |                                                              |       |
| 45 |                      |                      |                                                              |       |
| 46 | Consent or assent    | <a href="#">#26a</a> | Who will obtain informed consent or assent from potential    | 8     |
| 47 |                      |                      | trial participants or authorised surrogates, and how (see    |       |
| 48 |                      |                      | Item 32)                                                     |       |
| 49 |                      |                      |                                                              |       |
| 50 |                      |                      |                                                              |       |
| 51 | Consent or assent:   | <a href="#">#26b</a> | Additional consent provisions for collection and use of      | n/a   |
| 52 | ancillary studies    |                      | participant data and biological specimens in ancillary       |       |
| 53 |                      |                      | studies, if applicable                                       |       |
| 54 |                      |                      |                                                              |       |
| 55 |                      |                      |                                                              |       |
| 56 | Confidentiality      | <a href="#">#27</a>  | How personal information about potential and enrolled        | 16-17 |
| 57 |                      |                      | participants will be collected, shared, and maintained in    |       |
| 58 |                      |                      |                                                              |       |
| 59 |                      |                      |                                                              |       |
| 60 |                      |                      |                                                              |       |

order to protect confidentiality before, during, and after the trial

|    |                       |                      |                                                                 |       |
|----|-----------------------|----------------------|-----------------------------------------------------------------|-------|
| 1  |                       |                      |                                                                 |       |
| 2  |                       |                      |                                                                 |       |
| 3  |                       |                      |                                                                 |       |
| 4  | Declaration of        | <a href="#">#28</a>  | Financial and other competing interests for principal           | 23    |
| 5  | interests             |                      | investigators for the overall trial and each study site         |       |
| 6  |                       |                      |                                                                 |       |
| 7  |                       |                      |                                                                 |       |
| 8  | Data access           | <a href="#">#29</a>  | Statement of who will have access to the final trial            | 23    |
| 9  |                       |                      | dataset, and disclosure of contractual agreements that          |       |
| 10 |                       |                      | limit such access for investigators                             |       |
| 11 |                       |                      |                                                                 |       |
| 12 |                       |                      |                                                                 |       |
| 13 | Ancillary and post    | <a href="#">#30</a>  | Provisions, if any, for ancillary and post-trial care, and for  | n/a   |
| 14 | trial care            |                      | compensation to those who suffer harm from trial                |       |
| 15 |                       |                      | participation                                                   |       |
| 16 |                       |                      |                                                                 |       |
| 17 |                       |                      |                                                                 |       |
| 18 | Dissemination         | <a href="#">#31a</a> | Plans for investigators and sponsor to communicate trial        | 17    |
| 19 | policy: trial results |                      | results to participants, healthcare professionals, the          |       |
| 20 |                       |                      | public, and other relevant groups (eg, via publication,         |       |
| 21 |                       |                      | reporting in results databases, or other data sharing           |       |
| 22 |                       |                      | arrangements), including any publication restrictions           |       |
| 23 |                       |                      |                                                                 |       |
| 24 |                       |                      |                                                                 |       |
| 25 |                       |                      |                                                                 |       |
| 26 |                       |                      |                                                                 |       |
| 27 | Dissemination         | <a href="#">#31b</a> | Authorship eligibility guidelines and any intended use of       | 23    |
| 28 | policy: authorship    |                      | professional writers                                            |       |
| 29 |                       |                      |                                                                 |       |
| 30 |                       |                      |                                                                 |       |
| 31 | Dissemination         | <a href="#">#31c</a> | Plans, if any, for granting public access to the full protocol, | 17,23 |
| 32 | policy: reproducible  |                      | participant-level dataset, and statistical code                 |       |
| 33 | research              |                      |                                                                 |       |
| 34 |                       |                      |                                                                 |       |
| 35 |                       |                      |                                                                 |       |
| 36 | Informed consent      | <a href="#">#32</a>  | Model consent form and other related documentation              | n/a   |
| 37 | materials             |                      | given to participants and authorised surrogates                 |       |
| 38 |                       |                      |                                                                 |       |
| 39 |                       |                      |                                                                 |       |
| 40 | Biological specimens  | <a href="#">#33</a>  | Plans for collection, laboratory evaluation, and storage of     | n/a   |
| 41 |                       |                      | biological specimens for genetic or molecular analysis in       |       |
| 42 |                       |                      | the current trial and for future use in ancillary studies, if   |       |
| 43 |                       |                      | applicable                                                      |       |
| 44 |                       |                      |                                                                 |       |
| 45 |                       |                      |                                                                 |       |

The SPIRIT checklist is distributed under the terms of the Creative Commons Attribution License CC-BY-ND 3.0. This checklist can be completed online using <https://www.goodreports.org/>, a tool made by the [EQUATOR Network](#) in collaboration with [Penelope.ai](#)

# BMJ Open

## Counselling for physical activity, life-space mobility and falls prevention in old age (COSMOS): Protocol of a randomized controlled trial (ISRCTN65406039)

|                                 |                                                                                                                                                                                                                                                                                                                                                                                                                                                                                                                                                                                                                                                                                                                                                                                                                                                                                                                                                                                                                                                                                                                                                                                                                                                                                                                                                                                                                                                                                                                                                                                                                                                       |
|---------------------------------|-------------------------------------------------------------------------------------------------------------------------------------------------------------------------------------------------------------------------------------------------------------------------------------------------------------------------------------------------------------------------------------------------------------------------------------------------------------------------------------------------------------------------------------------------------------------------------------------------------------------------------------------------------------------------------------------------------------------------------------------------------------------------------------------------------------------------------------------------------------------------------------------------------------------------------------------------------------------------------------------------------------------------------------------------------------------------------------------------------------------------------------------------------------------------------------------------------------------------------------------------------------------------------------------------------------------------------------------------------------------------------------------------------------------------------------------------------------------------------------------------------------------------------------------------------------------------------------------------------------------------------------------------------|
| Journal:                        | <i>BMJ Open</i>                                                                                                                                                                                                                                                                                                                                                                                                                                                                                                                                                                                                                                                                                                                                                                                                                                                                                                                                                                                                                                                                                                                                                                                                                                                                                                                                                                                                                                                                                                                                                                                                                                       |
| Manuscript ID                   | bmjopen-2019-029682.R1                                                                                                                                                                                                                                                                                                                                                                                                                                                                                                                                                                                                                                                                                                                                                                                                                                                                                                                                                                                                                                                                                                                                                                                                                                                                                                                                                                                                                                                                                                                                                                                                                                |
| Article Type:                   | Protocol                                                                                                                                                                                                                                                                                                                                                                                                                                                                                                                                                                                                                                                                                                                                                                                                                                                                                                                                                                                                                                                                                                                                                                                                                                                                                                                                                                                                                                                                                                                                                                                                                                              |
| Date Submitted by the Author:   | 06-Jun-2019                                                                                                                                                                                                                                                                                                                                                                                                                                                                                                                                                                                                                                                                                                                                                                                                                                                                                                                                                                                                                                                                                                                                                                                                                                                                                                                                                                                                                                                                                                                                                                                                                                           |
| Complete List of Authors:       | Edgren, Johanna; Jyvaskylan Yliopisto, Faculty of Sport and Health Sciences; Jyvaskylan Yliopisto, Faculty of Sport and Health Sciences, Gerontology Research Center<br>Karinkanta, Saija; UKK Institute for Health Promotion Research<br>Rantanen, Taina; University of Jyväskylä, Faculty of Sport and Health Sciences; Jyvaskylan Yliopisto, Faculty of Sport and Health Sciences, Gerontology Research Center<br>Daly, Robin ; Deakin University, Institute for Physical Activity and Nutrition<br>Kujala, Urho; Jyvaskylan Yliopisto, Faculty of Sport and Health Sciences<br>Törmäkangas, Timo; Jyvaskylan Yliopisto, Faculty of Sport and Health Sciences; Jyvaskylan Yliopisto, Faculty of Sport and Health Sciences, Gerontology Research Center<br>Sievänen, Harri; UKK Institute for Health Promotion Research<br>Kannus, Pekka; UKK Institute for Health Promotion Research<br>Heinonen, Ari; University of Jyväskylä, Faculty of Sport and Health Sciences<br>Sipilä, Sarianna; Jyvaskylan Yliopisto, Faculty of Sport and Health Sciences; Jyvaskylan Yliopisto, Faculty of Sport and Health Sciences, Gerontology Research Center<br>Kannas, Lasse ; Jyvaskylan Yliopisto, Faculty of Sport and Health Sciences<br>Rantalainen, Timo; Jyvaskylan Yliopisto, Faculty of Sport and Health Sciences<br>Teittinen, Outi; Jyvaskylan Ammattikorkeakoulu, Research and Development, School of Health and Social Studies; Central Finland Centre for Economic Development, Transport and the Environment<br>Nikander , R ; Jyvaskylan Yliopisto, Faculty of Sport and Health Sciences; GeroCenter Foundation for Aging Research & Development |
| <b>Primary Subject Heading</b>: | Public health                                                                                                                                                                                                                                                                                                                                                                                                                                                                                                                                                                                                                                                                                                                                                                                                                                                                                                                                                                                                                                                                                                                                                                                                                                                                                                                                                                                                                                                                                                                                                                                                                                         |
| Secondary Subject Heading:      | Rehabilitation medicine, Sports and exercise medicine                                                                                                                                                                                                                                                                                                                                                                                                                                                                                                                                                                                                                                                                                                                                                                                                                                                                                                                                                                                                                                                                                                                                                                                                                                                                                                                                                                                                                                                                                                                                                                                                 |
| Keywords:                       | older people, physical activity, falls, counselling, life-space mobility, injuries                                                                                                                                                                                                                                                                                                                                                                                                                                                                                                                                                                                                                                                                                                                                                                                                                                                                                                                                                                                                                                                                                                                                                                                                                                                                                                                                                                                                                                                                                                                                                                    |
|                                 |                                                                                                                                                                                                                                                                                                                                                                                                                                                                                                                                                                                                                                                                                                                                                                                                                                                                                                                                                                                                                                                                                                                                                                                                                                                                                                                                                                                                                                                                                                                                                                                                                                                       |

1  
2  
3  
4  
5  
6  
7  
8  
9  
10  
11  
12  
13  
14  
15  
16  
17  
18  
19  
20  
21  
22  
23  
24  
25  
26  
27  
28  
29  
30  
31  
32  
33  
34  
35  
36  
37  
38  
39  
40  
41  
42  
43  
44  
45  
46  
47  
48  
49  
50  
51  
52  
53  
54  
55  
56  
57  
58  
59  
60

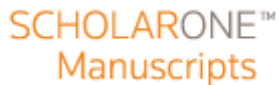

1  
2  
3 1 **Counselling for physical activity, life-space mobility and falls prevention in old**  
4 2 **age (COSMOS): Protocol of a randomized controlled trial (ISRCTN65406039)**

5  
6  
7 3 Edgren Johanna<sup>1,2</sup>, Karinkanta Saija<sup>3</sup>, Rantanen Taina<sup>1,2</sup>, Daly Robin M<sup>4</sup>, Kujala Urho M<sup>1</sup>,  
8 4 Törmäkangas Timo<sup>1,2</sup>, Sievänen Harri<sup>3</sup>, Kannus Pekka<sup>3</sup>, Heinonen Ari<sup>1</sup>, Sipilä Sarianna<sup>1,2</sup>,  
9 5 Kannas Lasse<sup>1</sup>, Rantalainen Timo<sup>1</sup>, Teittinen Outi<sup>5,6</sup>, Nikander Riku<sup>1,2,7</sup>

10  
11 6  
12 7 <sup>1</sup>Faculty of Sport and Health Sciences, University of Jyväskylä, Jyväskylä, Finland

13 8 <sup>2</sup>Faculty of Sport and Health Sciences, Gerontology Research Center, University of Jyväskylä,  
14 9 Jyväskylä, Finland

15 10 <sup>3</sup>UKK Institute for Health Promotion Research, Tampere, Finland

16 11 <sup>4</sup>Institute for Physical Activity and Nutrition, Deakin University, Geelong, Victoria, Australia

17 12 <sup>5</sup>Research and Development, School of Health and Social Studies, JAMK University of Applied  
18 13 Sciences, Jyväskylä, Finland

19 14 <sup>6</sup>Central Finland Centre for Economic Development, Transport and the Environment, Jyväskylä,  
20 15 Finland

21 16 <sup>7</sup>GeroCenter Foundation for Aging Research & Development, Jyväskylä, Finland

22 17  
23 18  
24 19 **E-mails:**

25 20 johanna.edgren@jyu.fi

26 21 saija.karinkanta@ukkinstituutti.fi

27 22 taina.rantanen@jyu.fi

28 23 robin.daly@deakin.edu.au

29 24 urho.m.kujala@jyu.fi

30 25 timo.tormakangas@jyu.fi

31 26 harri.sievanen@ukkinstituutti.fi

32 27 pekka.kannus@ukkinstituutti.fi

33 28 ari.o.heinonen@jyu.fi

34 29 sarianna.sipila@jyu.fi

35 30 lasse.k.kannas@jyu.fi

36 31 timo.rantalainen@jyu.fi

37 32 outi.teittinen@jamk.fi

38 33 riku.p.nikander@jyu.fi

39 34  
40 35  
41 36 **Corresponding author:**

42 37 Johanna Edgren

43 38 Faculty of Sport and Health Sciences/Gerontology Research Center

44 39 PL 35 (Viv)

45 40 40014 University of Jyväskylä

46 41 Finland

47 42 E-mail: johanna.edgren@jyu.fi

48 43 Tel: +358-40-8053869

49 44  
50 45 **Word count:** 5132

51 46 **Keywords:** counselling, falls, life-space mobility, older people, physical activity

52 47 **Issue date:** 5.6.2019

53 48 **Protocol version:** revision (02)

## 1 ABSTRACT

2 **Introduction:** The most promising way to promote active life years in old age is to promote  
3 regular participation in physical activity (PA). Maintaining lower extremity muscle function with  
4 good balance has been associated with fewer falls and the need of help from others. This article  
5 describes the design and intervention of a randomized controlled trial (RCT) investigating the  
6 effectiveness of a health and PA counselling program on life-space mobility and falls rates in  
7 community-dwelling older adults at the Health Kiosk and/or Service Centre.

8 **Methods and analysis:** Community-dwelling men and women (n=450) aged 65 years and over  
9 with early phase mobility limitation will be recruited to a 24-month RCT with a 24-month  
10 follow-up. Participants will be randomly allocated into either a health and PA counselling group  
11 (intervention) or relaxation group (control intervention). All participants will receive five group  
12 specific face-to-face counselling sessions and 11 phone calls. The counselling intervention will  
13 include individualized health counselling, strength and balance training and guidance to regular  
14 PA. The control group will receive relaxation exercises. Outcomes will be assessed at baseline,  
15 12, 24, and 48 months. Primary outcomes are average life-space mobility score and falls rates.  
16 Life-space mobility will be assessed by a validated questionnaire. Falls rates will be recorded  
17 from fall diaries. Secondary outcomes are data on fall-induced injuries and living-arrangements,  
18 number of fallers, fracture risk, mean level of PA, physical performance, quality of life, mood,  
19 cognition, balance confidence, and fear of falling. Data will be analyzed using the intention-to-  
20 treat principle. Cost-effectiveness of the program will be analyzed. Ancillary analyses are  
21 planned in participants with greater adherence.

22 **Ethics and dissemination:** Ethical approval was obtained from the Ethics Committee of the  
23 Tampere University Hospital (R15160). Outcomes will be disseminated through publication in  
24 peer-reviewed journals and presentations at international conferences.

25 **Trial registration:** Prospectively registered to ISRCTN (ISRCTN65406039).

26

27

## 1 STRENGTHS AND LIMITATIONS OF THE STUDY

- 2 - This randomized controlled trial will investigate the effectiveness of a pragmatic home-  
3 based exercise program on life-space mobility and falls rates.
- 4 - The counselling protocol is delivered by nurses and physiotherapists according to current  
5 evidence-based principles to maximize long-term exercise adherence and commitment to  
6 physical activity, and to prevent falls.
- 7 - Counselling sessions take place at easily accessible community-based Health Kiosk  
8 and/or Service Centre environment.
- 9 - This will be the first randomized controlled trial to evaluate the effectiveness of health  
10 and physical activity counselling in a community-based environment to improve life-  
11 space mobility and prevent falls.
- 12 - Research nurses and research physiotherapists are not blinded to the random allocation.

## 1 INTRODUCTION

2 The disablement process model by Verbrugge and Jette,[1] describes the path from pathology to  
3 disability via impairments and functional limitations. Accordingly, multiple health conditions  
4 (e.g. osteoarthritis) may lead to physical impairments (e.g. weak leg extensor muscles), which  
5 may result in functional limitations (e.g. challenges with lower extremity function and balance).  
6 Functional limitations may finally lead to disability resulting in uncertainty to walk safely, an  
7 increased fear of falling and rate of falls, all of which can further reduce movement within a  
8 typical living area,[2, 3]. In addition, restricted life-space mobility can reduce participation in  
9 social activities, which can lead to little utilization of community amenities available. This  
10 vicious cycle can escalate as overall health and well-being of older adults deteriorates.

11 Developing and implementing effective strategies that prevent disability and falls among older  
12 people is an urgent public health issue given our ageing population and the personal and societal  
13 impact from falls. Targeted exercise programs including muscle strength and balance training,  
14 such as the Otago Exercise Program, have been found to be effective at preventing falls and  
15 injurious falls among community-dwelling older adults,[4-6]. There is also evidence that older  
16 people with multiple risk factors for falls and thus at high risk of falling benefit from a  
17 multifactorial approach,[4]. For instance, a previous multifactorial trial (Chaos Falls Clinic),  
18 which included an individualized 12-month falls prevention programme, in high-risk individuals  
19 aged 70 years or over reduced falls and fall-induced injuries by over 25%,[7]. Despite its  
20 effectiveness, multifactorial interventions can be expensive and labour-intensive.

21 Community-based and easily accessible service platforms and concepts provide an opportunity  
22 potential for health and physical activity counselling since they may reach a broad range of older  
23 people who already wish to change their lifestyle. As an approach to reform the social and health  
24 care system in Finland and confront European megatrends such as the aging population with  
25 increasing public costs, community-based Health Kiosks and Service Centres have been launched  
26 to enable rapid health screening and counselling to support people to be active and participative  
27 in the society. Their focus is on health promotion and disability prevention. Scheduled  
28 appointments are not required and they are free of charge. A rapid health screening with tailored  
29 counselling and guidance at an easily accessible environment can offer a modernized primary  
30 care concept to tackle or slow down progressive but early phase health issues and disablement  
31 processes. It may also provide a unique opportunity to increase physical activity, support physical  
32 function, and avoid falls, depressive symptoms and social isolation,[8, 9].



1 To our knowledge, only one previous randomized controlled trial has shown the impact of a  
2 multifactorial intervention on life-space mobility in older people,[10]. It has been recommended  
3 that future studies should measure mobility at both the participation and activity levels.  
4 Additionally, it has been suggested that future research should include a longer follow-up period  
5 to determine if the benefits of any interventions are maintained long-term (> 12 months).  
6 Therefore, COSMOS will be the first randomized controlled trial to evaluate the effectiveness of  
7 24-month health and physical activity counselling program in a community-based Health Kiosk  
8 and/or Service Centre environment to improve life-space mobility and physical activity and  
9 prevent falls, and evaluate whether any benefits are sustained after a 24-month follow-up.  
10 Another novel aspect is that this study will assess simultaneously changes in the ratio of falls  
11 rates and the difference in rate changes in the life-space mobility outcome.

## 13 TRIAL OBJECTIVES AND HYPOTHESIS

14 The primary aim of this randomized controlled trial (RCT) named “Counselling for physical  
15 activity, life-space mobility and falls prevention in old age” (COSMOS) is to examine the  
16 effectiveness of a 24-month community-based health and physical activity counselling program in  
17 increasing life-space mobility and reducing the rate of falls in community-dwelling elderly people.

18 Secondary aims of the study are to evaluate the effects of the counselling intervention on data on  
19 fall-induced injuries and living-arrangements, number of fallers, fracture risk, mean level of  
20 physical activity, physical performance, quality of life, mood, cognition, and balance confidence.  
21 We will also evaluate the cost-effectiveness of the counselling program within the community-  
22 based environment for falls and whether any of the aforementioned potential benefits can be  
23 maintained two years after the end of 24-month intervention.

24 We hypothesise that 1) life-space mobility can increase and 2) fall rates can reduce via improved  
25 lower extremity ability, balance and mobility. These together enable increasing walking distances  
26 and thus support safe attendance to physical and social activities outside one’s own neighbourhood  
27 or home district.

## 1           2           3           4           5           6           7           8           9           10           11           12           13           14           15           16           17           18           19           20           21           22           23           24           25           26           27           28           29           30           31           32           33           34           35           36           37           38           39           40           41           42           43           44           45           46           47           48           49           50           51           52           53           54           55           56           57           58           59           60

## 1   **METHODS AND DESIGN**

2   This protocol article is written based on the SPIRIT reporting guidelines,[11] and the trial  
3   protocol was prospectively registered to ISRCTN (ISRCTN65406039). The experimental design  
4   is illustrated in *Figure 1*.

### 6   **Trial design and study setting**

7   COSMOS is a pragmatic single-blinded 24-month RCT with a 24-month follow-up at a  
8   community-based environment. Participants will be randomized into one of two groups: 1) a  
9   health and physical activity counselling intervention or 2) a relaxation intervention (control). All  
10   participants will be assessed at baseline and after 12- and 24-months. Additionally, there will be  
11   follow-up assessments at 48-months. All assessments will begin with a structured interview and  
12   health examination performed by a research nurse and followed by physical performance tests  
13   carried out by a research physiotherapist. All assessments and intervention sessions will take  
14   place at the Health Kiosk of Ylöjärvi or at the Service Centre of Ylöjärvi, Finland. Health Kiosk  
15   is a nurse-led pilot primary care service environment situated in a shopping center,[8, 9]. Service  
16   Centre is a modern meeting place for senior citizens with various indoor and outdoor activities.  
17   Ylöjärvi is a municipality of 32 000 inhabitants including suburban and rural areas. Study  
18   participants can choose themselves the place they would prefer to visit.

### 20   **Participant eligibility**

21   The target number of participants is 450 who will be randomly allocated to each group (n=225  
22   each). Both men and women will be recruited. Participant *inclusion criteria* are as follows: 1)  
23   aged 65 years or over, 2) community-living people, 3) living in Pirkanmaa District, Finland, and  
24   4) at least minor self-reported mobility difficulty.

25   *Mobility difficulty* will be assessed by using a structured and validated interview asking each  
26   participant about his or her ability to walk 2.0 km, walk 0.5 km, and climb up one flight of  
27   stairs,[12]. The questions are formulated as follows: “Do you have difficulty in ...” with five  
28   alternative response options provided: 1) ...able to manage without difficulty, 2) ...able to  
29   manage with some difficulty, 3) ...able to manage with great deal of difficulty, 4) ...able to  
30   manage only with help of another person, and 5) ...unable to manage even with help. To identify

1 persons with minor mobility difficulty, additional questions are posed to participants who do not  
2 report task difficulty with any of the above questions. The questions concern the modification of  
3 task performance and the alternatives given are: resting in the middle of the performance, using  
4 an aid, taking support from handrails, having reduced the frequency of performing the task,  
5 having slowed down performance of the task, experiencing tiredness when performing the task,  
6 or some other change in carrying out the task. *Minor mobility difficulty* is considered if  
7 participant reports task modification in one or more of the tasks listed above.

8 Participant *exclusion criteria* are following: 1) severe functional limitations (unable to walk 500  
9 meters unaided), 2) severe cardiovascular or pulmonary disease, 3) severe progressive disease, 4)  
10 terminally ill (predicted life expectancy <12 months), 5) memory impairment (MMSE score 21  
11 points or less),[13], 6) living in an institution, 7) unwilling to be randomized, or 8) alcoholism  
12 (AUDIT score  $\geq 15$ ),[14]. Severe cardiovascular and severe pulmonary disease is defined as,  
13 conditions which are currently either unstable or contraindications for physical exercise and/or  
14 need immediate medical attention. Severe progressive disease is defined as, conditions such as  
15 neoplasm and amyotrophic lateral sclerosis (ALS), which have poor prognosis and presumably  
16 poor response or no response to physical exercise.

## 18 **Recruitment**

19 We will recruit eligible men and women during their Health-Kiosk and Service Centre visits as  
20 well as via newspaper advertisements, notice boards, community centers, and at senior events.  
21 All participants will be initially screened for eligibility over the telephone (age, living  
22 arrangements, and place of residence) where they will have the opportunity to ask questions and  
23 have an informed discussion with research staff. Following the telephone screening, those who  
24 are eligible and are willing to participate, will receive an information letter, consent forms and  
25 reply-paid envelope. Upon receiving a signed informed consent form, a member of the research  
26 team will sign each form prior to the baseline assessments. Potential participants will be invited  
27 to the baseline assessments, where a trained research nurse confirms their eligibility with a  
28 structured interview and health examination.

## 1 **Random allocation**

2 Participants will be randomly allocated into either 1) the health and physical activity counselling  
3 intervention or 2) the relaxation intervention (control group). A computer generated  
4 randomization protocol will be created by a statistician who is not part of the research team.  
5 Random allocation will be stratified by sex, age (65-79 years/80 years or older) and presence or  
6 absence of falls during the last 24 months. Block size of 6, 8, 10 or 12 will be randomly varied to  
7 ensure the equality of group sizes (allocation ratio 1:1). Allocation results will be stored in sealed  
8 envelopes and stored in locked cabin. After the baseline measurements, a researcher will open  
9 one envelope according to each participant's sex, age and previous falls, and then verify with the  
10 research records, which intervention the participant is allocated. Participants are informed  
11 whether they belong to the health and physical activity counselling or relaxation group.  
12 Allocation concealment will be ensured, as the randomisation code will only be released at the  
13 completion of the study. Research nurses and physiotherapists are not blinded to the group  
14 allocation due to limited financial and personnel resources. The principal investigator will be  
15 blinded.

## 17 **Interventions**

18 The COSMOS study involves two interventions: 1) health and physical activity counselling, and  
19 2) a relaxation intervention (control group). *Supplementary figure* describes the participant  
20 timeline. Both interventions include five face-to-face sessions taking place at week one and one,  
21 three, six, and 12 months after the baseline measurements. During each face-to-face session, a  
22 physiotherapist will provide instructions for the next level of the program. Participants will be  
23 provided with 11 supportive telephone calls by a physiotherapist, regardless of the intervention,  
24 which will be delivered at two, four, five, seven, eight, nine, ten, 11, 16, 20 and 23 months after  
25 baseline. The total duration of the interventions is 24 months. At the end of the first face-to-face  
26 session, the physiotherapist informs the participant on how to fill out the physical activity and  
27 falls diary.

### 28 ***Health and physical activity counselling intervention***

29 Participants randomized to the health and physical activity counselling intervention will receive  
30 five individually tailored 1.5-hour face-to-face sessions containing a 30-minute health

1 counselling session by a trained research nurse together with a 60-minute physical activity  
2 counselling session delivered by an experienced research physiotherapist.

3 *The health counselling* follows the motivational interviewing concept,[15] based on the Social  
4 Cognitive Theory,[16] and the trans-theoretical model,[17]. The structure of the health  
5 counselling is based on the guidelines of the IKINÄ-manual, which is a guide for preventing falls  
6 and harm from falls in older people, released by the Finnish National Institute for Health and  
7 Welfare,[18]. Accordingly, during health counselling sessions the nurse will advise participants  
8 on safety issues related to their home-environment, such as providing recommendations to use  
9 anti-slippery shoe devices during winter, and participating in regular physical activity.  
10 Additionally, participants in the health and physical activity counselling intervention will receive  
11 handouts on how to avoid fall accidents in the home environment and outdoors. Moreover, health  
12 counselling sessions will include counselling on a healthy diet and recommendations to reduce  
13 alcohol consumption and smoking based on discussions with each participant about her/his  
14 background and habits, and motivation to change,[15]. The nurse will also discuss topical and  
15 relevant health related issues with health and physical activity counselling intervention members  
16 i.e. managing blood pressure, medication, and depressive mood.

17 *The physical activity counselling* is based on the modified version of the Otago Exercise Program  
18 (OEP, available online),[19]. The OEP is an innovative model of low frequency physical activity  
19 counselling and exercise training tailored for older people and typically delivered by a  
20 physiotherapist at older people's home. It contains four levels (A, B, C, and D) which all contain  
21 strengthening exercises for lower extremity muscles as well as balance, walking and stair  
22 climbing exercises and active range of movement exercises (e.g. neck rotations and hip and knee  
23 extensions). The exercises on each level take about 30 minutes to complete. Participants are  
24 expected to exercise three times a week at home and go for a walk at least twice a week for 30  
25 minutes. Walking exercise can also be broken into smaller periods e.g. three ten-minute bouts.

26 The physiotherapist may modify and apply the OEP individually based on health, motivational  
27 status, and participant goals. The participants will receive progressive illustrated instructions and  
28 will be provided with ankle weights (0.5–5.0 kg) for the first 12 months. Thereafter, therapist will  
29 encourage participants to attend a local gym or be involved with other community exercise  
30 facilities. For this study, two additional training levels (COSMOS 1 and COSMOS 2, illustrated  
31 in **Table 1**) have been developed to ensure progression throughout the 24-month intervention.

1 During the physical activity counselling sessions, a physiotherapist will also discuss the  
 2 importance of regular and diverse physical activity and presents the Physical Activity Pie for  
 3 Older Adults (Finnish recommendations for physical activity among 65 years old and older)  
 4 ([http://www.ukkinstituutti.fi/filebank/64-physical\\_activity\\_pie.pdf](http://www.ukkinstituutti.fi/filebank/64-physical_activity_pie.pdf)). In addition, therapist will  
 5 provide an exercise referral to a local community exercise facilities based on the earlier  
 6 discussions with the participant about her/his background and motivation to exercise. When  
 7 participant receives a referral to a community-based exercise program, the physiotherapist will  
 8 instruct him/her to replace one of the weekly Otago, COSMOS or walking exercises with  
 9 corresponding exercise. For instance, participant may replace the Otago strength exercise with  
 10 gym training or by attending a strength-training group. Correspondingly, participant may replace  
 11 Otago balance exercise with yoga, Pilates, Tai Chi, or other guided balance exercise. Walking  
 12 exercises can also be replaced e.g. with swimming or other aerobic exercise format.

14 **Table 1.** Content of the COSMOS 1 and 2 levels

|                                | <b>COSMOS 1</b>                                                                                                                                                                                                                                                                           | <b>COSMOS 2</b>                                                                                                                               |
|--------------------------------|-------------------------------------------------------------------------------------------------------------------------------------------------------------------------------------------------------------------------------------------------------------------------------------------|-----------------------------------------------------------------------------------------------------------------------------------------------|
| <b>Warm-up</b>                 | Same as in the Otago Exercise Program                                                                                                                                                                                                                                                     | Same as in the Otago Exercise Program                                                                                                         |
| <b>Strengthening exercises</b> | <ul style="list-style-type: none"> <li>• One legged squat</li> <li>• One legged sit to stand</li> <li>• Sideways squats</li> <li>• Jumping exercises</li> </ul>                                                                                                                           | Same strengthening exercises as in the COSMOS 1<br>→ Repetitions and series are updated and jumping exercises are extended and more demanding |
| <b>Balance exercises</b>       | <ul style="list-style-type: none"> <li>• Same as in the D level of the Otago Exercise Program but stair climbing is replaced with squats</li> <li>• Additionally, multitasking is incorporated into all exercises (e.g., participants count repetitions or seconds backwards).</li> </ul> | Same balance exercises as in the COSMOS 1 level but all exercises are performed with eyes closed                                              |

16 ***Relaxation intervention (control group)***

17 Participants randomized to the relaxation intervention will receive five 45-minute face-to-face  
 18 sessions of structured relaxation exercises instructed by a physiotherapist. We believe that  
 19 offering relaxation exercises will motivate the control participants to continue in the study  
 20 without increasing their physical activity. The relaxation program will be updated during each  
 21 face-to-face session and will proceed as follows: 1) learning the diaphragmatic respiration  
 22 technique, 2) learning the tension-relaxation technique, 3) utilizing tension-relaxation technique,

1  
2  
3 1 4) utilizing techniques learned in previous exercises to whole body relaxation, and 5) learning  
4 2 consciousness of the body sensations. All exercises will be displayed on a compact disc (CD) or  
5 3 via mp3-format. Additionally, written instructions will be available. During the first face-to-face  
6 4 session, participants will receive the same handouts as the health and physical activity  
7 5 counselling intervention members on how to avoid fall accidents in the home environment and  
8 6 outdoors.

### 7 ***Supportive telephone calls***

8 During 11 supportive telephone calls, the physiotherapist will enquire about how exercise  
9 (physical activity or relaxing program) is progressing, has the participant fallen and ensure that  
10 the most recent fall and exercise diary is returned. Additionally, therapists will confirm or  
11 schedule the next face-to-face session or 12- and 24-month follow-up measurements when  
12 appropriate. If a participant has fallen, therapists will confirm the circumstances and consequence  
13 related to the fall/falls. For those in the health and physical activity counselling group, the  
14 therapist will also discuss if there is a need to update the program, i.e. revise the number of  
15 repetitions and/or series or change the magnitude of the ankle weight before the next face-to-face  
16 session. In addition, any barriers to exercise that have come up from the participants will be  
17 addressed.

### 18 19 **Outcomes**

20 Assessments will include a comprehensive battery of tests and questionnaires on mobility,  
21 physical activity, physical function and health. The baseline assessment will take about 2 h to  
22 complete whereas 12-month and 24-month assessments will take about 1.5 h. The order of the  
23 assessments and measurements is standardized at each time point. **Table 2** presents the outcome  
24 and other variables, methods and schedule of the assessments in the study.

### 25 ***Primary outcomes***

26 Daily filled and monthly returned fall diaries will be used to gather information on the *falls rates*  
27 during the 24-month intervention and follow-up. A fall is defined as an unexpected event in  
28 which participant comes to rest on the ground, floor or other lower level [20]. A research  
29 physiotherapist will phone monthly all those participants who have reported a fall or falls or if a  
30 diary is not returned.

**Table 2.** Outcome and other variables, methods and schedule of the assessments

| <b>Continuous monitoring</b>                                                                                                                                                          | <b>BL</b> | <b>12-month</b> | <b>24-month</b> | <b>48-month</b> | <b>O</b> |
|---------------------------------------------------------------------------------------------------------------------------------------------------------------------------------------|-----------|-----------------|-----------------|-----------------|----------|
| <b>Falls rates</b>                                                                                                                                                                    |           |                 |                 |                 | <b>P</b> |
| Daily filled and monthly returned diaries                                                                                                                                             | N         | Y               | Y               | Y               |          |
| Number of fallers i.e. a fall indicator variable (yes/no)                                                                                                                             |           |                 |                 |                 | S        |
| Daily filled and monthly returned diaries                                                                                                                                             | N         | Y               | Y               | Y               |          |
| <b>Fall-induced injuries</b>                                                                                                                                                          |           |                 |                 |                 | S        |
| Daily filled and monthly returned diaries and telephone interviews                                                                                                                    | N         | Y               | Y               | N               |          |
| Hospital registers are used to verify severe injuries                                                                                                                                 | N         | Y               | Y               | Y               |          |
| <b>Health service use</b>                                                                                                                                                             |           |                 |                 |                 |          |
| Hospital registers are used to verify severe injuries                                                                                                                                 | N         | Y               | Y               | Y               |          |
| <b>Adverse events due to interventions</b>                                                                                                                                            |           |                 |                 |                 |          |
| Daily filled and monthly returned diaries and telephone interviews                                                                                                                    | N         | Y               | Y               | N               |          |
| <b>Participant adherence to the interventions</b>                                                                                                                                     |           |                 |                 |                 |          |
| Average number and duration of exercise sessions and total number and duration of exercise sessions based on daily filled and monthly returned physical activity and exercise diaries | N         | Y               | Y               | N               |          |
| <b>Perceived exertion of interventions</b>                                                                                                                                            |           |                 |                 |                 |          |
| Modified Borg scale (range 0-10)                                                                                                                                                      | N         | Y               | Y               | N               |          |
| <b>Physical, cognitive and social assessments</b>                                                                                                                                     | <b>BL</b> | <b>12-month</b> | <b>24-month</b> | <b>48-month</b> |          |
| <b>Physical activity</b>                                                                                                                                                              |           |                 |                 |                 | S        |
| Hookie AM 20 triaxial accelerometer for 7 days                                                                                                                                        | Y         | Y               | Y               | N               |          |
| Daily filled and monthly returned physical activity and exercise diaries                                                                                                              | N         | Y               | Y               | N               |          |
| Validated questionnaire (Scale of Grimby)                                                                                                                                             | Y         | Y               | Y               | Y               |          |
| <b>Physical performance</b>                                                                                                                                                           |           |                 |                 |                 | S        |
| Timed Up and Go-test (TUG)                                                                                                                                                            | Y         | Y               | Y               | N               |          |
| Short Physical Performance Battery (SPPB)                                                                                                                                             | Y         | Y               | Y               | N               |          |
| Jamar hand dynamometer                                                                                                                                                                | Y         | Y               | Y               | N               |          |
| <b>Body composition</b>                                                                                                                                                               |           |                 |                 |                 |          |
| Height and weight are measured and BMI is calculated                                                                                                                                  | Y         | Y               | Y               | Y               |          |
| <b>Fracture risk</b>                                                                                                                                                                  |           |                 |                 |                 | S        |
| World Health Organization Fracture Risk Assessment Tool (FRAX)                                                                                                                        | Y         | Y               | Y               | Y               |          |
| <b>Cardiovascular condition</b>                                                                                                                                                       |           |                 |                 |                 |          |
| New York Heart Association functional class (NYHA)                                                                                                                                    | Y         | Y               | Y               | Y               |          |
| Orthostatic test                                                                                                                                                                      | Y         | Y               | Y               | N               |          |
| <b>Self-reported physical ability</b>                                                                                                                                                 |           |                 |                 |                 |          |
| Determined by asking                                                                                                                                                                  | Y         | Y               | Y               | Y               |          |
| <b>Mobility difficulty</b>                                                                                                                                                            |           |                 |                 |                 |          |
| Structured interview                                                                                                                                                                  | Y         | Y               | Y               | Y               |          |
| <b>Need of mobility assistive devices</b>                                                                                                                                             |           |                 |                 |                 |          |
| Determined by asking                                                                                                                                                                  | Y         | Y               | Y               | Y               |          |
| <b>Living arrangements</b>                                                                                                                                                            |           |                 |                 |                 | S        |
| Determined by asking                                                                                                                                                                  | Y         | Y               | Y               | Y               |          |
| <b>Questionnaire-based assessments</b>                                                                                                                                                | <b>BL</b> | <b>12-month</b> | <b>24-month</b> | <b>48-month</b> |          |
| <b>Life space mobility</b>                                                                                                                                                            |           |                 |                 |                 | <b>P</b> |
| Life-space mobility assessment (LSA)                                                                                                                                                  | Y         | Y               | Y               | Y               |          |
| <b>Balance confidence</b>                                                                                                                                                             |           |                 |                 |                 | S        |
| Activities-specific Balance Confidence scale (ABC)                                                                                                                                    | Y         | Y               | Y               | Y               |          |
| <b>Fear of falling</b>                                                                                                                                                                |           |                 |                 |                 | S        |
| Determined by asking and by Visual Analogue Scale (VAS)                                                                                                                               | Y         | Y               | Y               | Y               |          |
| <b>Quality of life (QOL)</b>                                                                                                                                                          |           |                 |                 |                 | S        |
| World Health Organization Quality of Life (WHOQOL) questionnaire                                                                                                                      | Y         | Y               | Y               | Y               |          |
| <b>Cognitive status</b>                                                                                                                                                               |           |                 |                 |                 | S        |
| Mini-Mental State Examination (MMSE)                                                                                                                                                  | Y         | Y               | Y               | Y               |          |
| <b>Depressive mood</b>                                                                                                                                                                |           |                 |                 |                 | S        |
| Geriatric Depression Scale (GDS-15)                                                                                                                                                   | Y         | Y               | Y               | Y               |          |
| <b>Alcohol consumption</b>                                                                                                                                                            |           |                 |                 |                 |          |
| The Alcohol Use Disorders Identification Test (AUDIT)                                                                                                                                 | Y         | Y               | Y               | Y               |          |

BL=baseline, O=outcome, N=no, Y=yes, P=primary, S=secondary



1 *Life-space mobility Assessment (LSA)* is determined from a validated questionnaire, which  
2 measures the size of the area that a person has moved around in during the 4 weeks preceding the  
3 assessment,[2]. It correlates with observed physical performance and self-reported function,[2].  
4 For each level of life-space (bedroom, other rooms, outside home, neighbourhood, town, beyond  
5 town) persons are asked how many days within a week they attained that level of life-space and  
6 whether they need help from another person or from assistive devices. A composite measure of  
7 life-space combines the components of life-space level attained, degree of independence, and  
8 frequency of attainment,[3].

### 9 ***Secondary outcomes***

10 A number of secondary outcome measures will be assessed to clarify potential mechanism  
11 underlying any reduction in fall rates or increased life-space mobility during the trial, and to  
12 determine to what extent the training transfers to other important outcomes.

13 *Physical activity:* The Finnish Hookie AM 20 triaxial accelerometer will be used to measure all  
14 physical activity over a 7-day period. The Hookie AM 20 device and related data analyses is  
15 based on the UKK Institute's algorithms which has been used in three large Finnish population-  
16 based cohort studies,[21, 22] and in older community dwelling individuals,[23]. A physical  
17 activity and exercise diary will also be used during the first 24 months' period of the study. Self-  
18 reported physical activity will also be quantified using a modified version of the scale by  
19 Grimby,[24, 25].

20 *Physical performance:* An experienced research physiotherapist will conduct all physical  
21 performance tests, including the Timed Up and Go-test (TUG),[26] and Short Physical  
22 Performance Battery (SPPB),[27]. Handgrip strength from the dominant arm will be assessed  
23 using the Jamar hand dynamometer,[28].

24 *A fall indicator variable* (yes/no) will be formed. Additionally, *fall-induced injuries* will be  
25 assessed based on diaries filled daily and returned each month until 24-months after the baseline.  
26 Hospital registers will also be used to verify severe injuries (i.e. fractures and head injuries)  
27 during the intervention and follow-up. Injuries will be categorized as follows: 1) soft tissue  
28 bruises and contusions, 2) wounds and lacerations, 3) bone fractures, 4) joint distortions and  
29 dislocations, 5) head injuries other than fractures, and 6) other injuries. Additionally, all injuries  
30 will be categorized based on medical contact and/or treatment.

1  
2  
3 1 *Health-related quality of life* will be assessed using the World Health Organization Quality of  
4 Life (WHOQOL) 26-item short version questionnaire, which includes questions related to  
5 2 Life (WHOQOL) 26-item short version questionnaire, which includes questions related to  
6 3 physical health, psychological health, social relationships and environment,[29]. *Living-*  
7 4 *arrangements* will be determined by interview. *Fracture risk* will be assessed by WHO Fracture  
8 5 Risk Assessment Tool (FRAX) via interview. The FRAX algorithms give the 10-year probability  
9 6 of hip fracture and a major osteoporotic fracture (clinical spine, forearm, hip or shoulder  
10 7 fracture),[30].

11 8 *Depressive mood* will be assessed using the Geriatric Depression Scale (GDS-15),[31].  
12 9 Participants who achieve 6 points or more on GDS-15 test will be referred to their physician for  
13 10 follow up. *Cognitive status* will be assessed via the Mini-Mental State Examination  
14 11 (MMSE),[13]. Participants who score 21 points or less in MMSE are excluded and referred to a  
15 12 physician appointment.

16 13 *Balance confidence* will be evaluated using the Activities-specific Balance Confidence scale  
17 14 (ABC),[32]. *Fear of falling* will be assessed (yes/no) and measured by the Visual Analogue  
18 15 Scale (VAS),[33]. A 100-mm long line will be used with the left end of the line (0 mm)  
19 16 representing “no fear” and the right end (100 mm) “extreme fear”.

### 17 ***Other variables***

18 18 During the health examination, the research nurse will measure height and weight using standard  
19 19 procedures. Body mass index will be calculated as body weight (kg)/height (m) squared. The  
20 20 research nurse will also ask about any chronic and geriatric conditions, prescription  
21 21 medication(s) and the presence of any *cardiovascular condition* using New York Heart  
22 22 Association functional class (NYHA),[34] and perform an orthostatic test,[35]. *Alcohol*  
23 23 *consumption* will be assessed by the AUDIT-C tool and additionally by AUDIT if the AUDIT-C  
24 24 score is 6 or more among men and 5 or more among women,[14]. If the AUDIT score is 15 or  
25 25 more, participants will be excluded and referred to a health care practitioner.

26 26 *Self-reported physical ability* will be determined via interview and asking participants: “How  
27 27 would you describe your physical ability?” Options are: 1) excellent, 2) good, 3) average, and 4)  
28 28 poor. *Need of mobility assistive devices* will also be determined via interview. *Mobility difficulty*  
29 29 will be assessed using a structured interview described earlier (see participant eligibility). As an  
30 30 outcome measure of *adherence*, we utilize the average number and duration of exercise sessions  
31 31 and total number and duration of exercise sessions based on daily completed and monthly

1 returned physical activity and exercise diaries. In addition, *perceived exertion* will be assessed  
2 using the modified Borg Rating of Perceived Exertion (RPE) scale (range 0-10),[36].

3 *Demographics* include age, sex, marital status, education, and most recent occupation, as well as  
4 diet, use of spectacles, and smoking habits and whether participants have any problems related to  
5 vision and hearing, will be determined by interview. *Previous falls* will also be asked at baseline:  
6 “Have you fallen (and if so, how many times) during the previous year/6 months/month (without  
7 substantial external force) and did you injure yourself? *Adverse events* due to interventions are  
8 assessed by daily completed and monthly returned diaries and telephone interviews.

## 10 **Statistical methods**

### 11 ***Pretrial power calculations***

12 We estimated the minimum required sample size in a simulation model including the continuous  
13 and count outcomes and the mutual correlation estimated via normally distributed random  
14 effects. Sample size estimation accounted for the multiple testing and the correlation between  
15 outcomes,[37]. Based on previous research,[7], we assumed that the control group would have a  
16 fall incidence of 131 per 100 person-years and the corresponding rate in the intervention group  
17 would be 118 per 100 person-years, which corresponds to a modest relative risk reduction of  
18 about 10% in favor of the intervention group. To allow some over-dispersion in the fall count,  
19 the normally distributed random effect variance was set at 0.3. Based on data from the Life-  
20 Space Mobility in Old Age (LISPE) study,[38], we set the mean at 64.0 (SD = 20.6) for the life-  
21 space mobility score, which was increased to 70.4 in the intervention group during the follow-up  
22 representing a relative increase of 10%. To obtain a conservative sample size estimate the  
23 random effect correlation was set at the low value 0.10. The simulation studies were based on  
24 1000 replications of the model parameters. To find the likelihood ratio test statistic significant at  
25 5% significance level for the above mean difference and risk ratio simultaneously, power of 80%  
26 was reached with a sample size of 346 based on equal allocation of subjects into the control and  
27 intervention groups. To account for 30% attrition, the sample size was increased to 450 (225 in  
28 each group). In previous intervention studies including similar components, dropout rates have  
29 been approximately 15 % (Palvanen et al. 2014). We hypothesized the attrition rate to be even  
30 greater, because for majority of the participants, participation involved travelling across  
31 Pirkanmaa District (distances were even 100 km in each direction), and travelling costs were not  
32 covered and transportation was not arranged by COSMOS.

## 1 ***Statistical analyses***

2 All statistical analyses will be conducted using the Mplus software and IBM SPSS software  
3 package version 24 (IBM Corp, Armonk, New York). We will analyze the data on an intention-  
4 to-treat basis, using the data from all randomized participants despite the protocol adherence and  
5 independent of the sponsor and competing interest. Follow-up time for falls, fallers and fall-  
6 induced injuries including fractures will be calculated from the day when participant started the  
7 intervention to the end of the 24-month intervention + 24-month follow-up or withdrawal from  
8 study.

9 The *primary outcome analysis* is a likelihood ratio test assessing simultaneously changes in the  
10 ratio of falls rates and the difference in rate changes in the LSA outcome. The test is based on a  
11 model of the fall outcome in a negative binomial regression model, where a random effect is  
12 used to account for likely over dispersion in the fall count distribution and the intraclass  
13 correlation of the measurement time points. Descriptive information is calculated as incidence  
14 rates of falls, fallers, multiple fallers and fall-induced injuries (including fractures) per 100  
15 person-years. Proportion of fallers between groups will be reported using incidence rate ratio  
16 statistics.

17 *Ancillary analysis* using causal modelling will be conducted to establish intervention effects in  
18 people with greater adherence (per protocol analysis). Covariance analysis will be used to  
19 analyze between group-differences in other continuous variables and general linear models will  
20 be utilized to assess the effect of group allocation on continuous secondary outcome measures.  
21 Logistic regression models will be used to compare the two intervention groups on dichotomous  
22 outcome measures. *The explanatory factors of exercise adherence* will be investigated in a  
23 longitudinal path model enabling the linking data from individual characteristics to intervention  
24 effectiveness. Directed acyclic graphs are used to establish theoretical model relationships that  
25 serve as basis for model development with observed data. Additionally, we model physical  
26 activity trajectories and investigate individual variability among the trajectories.

27 *Economic analyses* will be approached from the perspective of the community health care  
28 provider. The health outcome measure will be cost per fall prevented over the study duration.  
29 Costs will include intervention costs as well as fall-induced health care and community service  
30 costs. Cost-utility is based on quality-adjusted life years (QALY) gained, where quality is  
31 measured at 12, 24 and 48 months with the WHO quality of life (WHOQoL) index. Using mean  
32 costs and QoL in each treatment arm, the intervention cost effectiveness will be assessed by

1  
2  
3 1 comparing the intervention incremental cost per a prevented fall and incremental cost per QALY  
4 gained to those in the control group. The probability that the intervention is cost effective will be  
5 2 computed based on bootstrapping the incremental cost-effectiveness ratio as described in,[39].  
6 3  
7 4 Cost-effectiveness acceptability curves will be plotted for various levels of willingness to pay.  
8  
9

10  
11 5 Where missing data is generated through the missing-at-random (MAR) mechanism, we will  
12 6 employ the standard MAR-based likelihood specification in Mplus,[40]. A custom missing data  
13 7 model will be used when missing data is generated by a non-random mechanism.  
14  
15  
16

17 8

## 19 9 **DATA MANAGEMENT**

20  
21  
22  
23 10 Once a participant has been randomly allocated, every effort will be made to follow-up the  
24 11 participant on outcome measures until the end of the study period. Any participants who  
25 12 discontinue or deviate from the intervention protocols or fail to complete the exercise and falls  
26 13 diary will still be invited to complete the 12 and/or 24 follow-up measurements. Participant data  
27 14 are stored on a secure database in accordance with the General Data Protection Regulations  
28 15 (2018). All collected data will be coded with unique identification numbers and stored centrally  
29 16 on the secure database of the University of Jyväskylä, a password-protected computer or in a  
30 17 locked filing cabinet in a secure office space, only accessible by a limited number of people. The  
31 18 questionnaires and forms will be checked for completeness and congruity instantly when filled  
32 19 and/or received and again before data entry onto the database. Additionally, we will regularly  
33 20 check the data files for omissions and errors to ensure the data integrity. Trial documentation and  
34 21 data will be archived for at least 10 years after completion of the trial after which it will be  
35 22 destroyed. The data monitoring committee (DMC) consists of the research group members (see  
36 23 front page).  
37  
38  
39  
40  
41  
42  
43  
44  
45  
46  
47  
48  
49

## 50 25 **TRIAL MONITORING**

51  
52  
53 26 A standard operation procedure has been written before launching the study and will be followed  
54 27 carefully throughout the study. Regular meetings will be organized for monitoring the quality of  
55 28 data collection. Senior researchers will carefully educate the personnel performing the  
56 29 measurements and the same staff will engage in the data collection throughout the study.  
57  
58  
59  
60

30

## 1 **ETHICS AND DISSEMINATION**

2 The Ethics Committee of the Tampere University Hospital has approved the procedures and  
3 design of the trial (03/11/2015, ref: R15160). The COSMOS study is carried out according to the  
4 guidelines of good scientific practice (Declaration of Helsinki). Any protocol modifications will  
5 be reported to the Ethical Committee and to the trial registry (ISRCTN). Participants are insured  
6 for intervention related harms. Moreover, we will record any adverse events from either of the  
7 interventions and report serious adverse events to the ethics committee. Participants may  
8 withdraw from the study for any reason at any time.

9 The research team is committed to full disclosure of the results of the trial. Findings will be  
10 reported in accordance with the CONSORT guidelines in peer reviewed journals and  
11 international scientific conferences. The funder will have no role in the analysis or interpretation  
12 of the trial results. The study results will also be disseminated to the participants. Two  
13 information sessions will be organized to the study participants when the data of the primary  
14 outcomes has been analysed.

15 The research environment of the COSMOS trial is unique, because the trial is conducted at a  
16 Health Kiosk and/or a Service Centre, which are new easily accessible, free of charge  
17 counselling concepts, targeted and tailored for elderly people. This allows extending the study  
18 further to investigate the effectiveness of the counselling and exercise referral to promote actual  
19 mobility and to prevent fractures as a primary endpoint, which, according to our knowledge, has  
20 not been done before. If proven safe and effective in the population setting, the  
21 counselling/referral-concept could also be modified and extended to investigate other health  
22 hazards such as elderly people experiencing memory complaints or cognitive impairments and/or  
23 people having early depressive signs to meet their hazards early for effective prevention and/or  
24 treatment.

## 26 **PATIENT AND PUBLIC INVOLVEMENT STATEMENT**

27 We did not directly include patient and public involvement in this study, but we will develop the  
28 counselling program based on participant feedback.

## 1 ACKNOWLEDGMENTS

2 The authors would like to thank all the trial participants. We thank also the research  
3 physiotherapists: Elina Ahlstedt-Kivelä, Paju Becker, and Eerika Tiirikainen as well as the  
4 research nurses: Anneli Peltonen, Kirsi Perkkiö, Tiina Raittinen, Laura-Emilia Vainio, and Arja  
5 Ylä-Rakkola for their valuable contribution. Additionally, authors would like to thank physician  
6 Jaakko Valvanne for his feedback on the health examination concept and psychologist Päivi  
7 Lappalainen for introducing the motivational interviewing technique to the study personnel. We  
8 wish to thank statistician Markku Kauppinen, who created the random allocation protocol. We  
9 thank also Sirpa Ellala, Paula Pasanen-Aro, Maarit Pitkänen, Anne Santalahti, and Laura  
10 Tyyskänen at the administration of the City of Ylöjärvi for ongoing collaboration and the  
11 Academy of Finland for funding the study.

## 1 REFERENCES

- 1 Verbrugge LM, Jette AM. The disablement process, *Soc Sci Med* 1994;38:1-14.
- 2 Baker PS, Bodner EV, Allman RM. Measuring life-space mobility in community-dwelling older adults, *J Am Geriatr Soc* 2003;51:1610-4 [published Online First: Nov].
- 3 Peel C, Sawyer Baker P, Roth DL, et al. Assessing mobility in older adults: the UAB Study of Aging Life-Space Assessment, *Phys Ther* 2005;85:1008-119 [published Online First: Oct].
- 4 Gillespie LD, Robertson MC, Gillespie WJ, et al. Interventions for preventing falls in older people living in the community, *Cochrane Database Syst Rev* 2012:CD007146 doi:10.1002/14651858.CD007146.pub3 [published Online First: Sep 12,].
- 5 El-Khoury F, Cassou B, Charles M, et al. The effect of fall prevention exercise programmes on fall induced injuries in community dwelling older adults: systematic review and meta-analysis of randomised controlled trials, *BMJ* 2013;347:f6234 [published Online First: Oct 29,].
- 6 Guirguis-Blake JM, Michael YL, Perdue LA, et al. Interventions to Prevent Falls in Older Adults: Updated Evidence Report and Systematic Review for the US Preventive Services Task Force, *JAMA* 2018;319:1705-16 doi:10.1001/jama.2017.21962 [published Online First: 04 24,].
- 7 Palvanen M, Kannus P, Piirtola M, et al. Effectiveness of the Chaos Falls Clinic in preventing falls and injuries of home-dwelling older adults: a randomised controlled trial, *Injury* 2014;45:265-71 doi:10.1016/j.injury.2013.03.010 [published Online First: Jan].
- 8 Kork A, Kivimäki R, Rimpelä A, et al. Terveyskioski palveluinnovaationa - Lahden terveyskioski- hankkeen väliarviointi (Vaihe II) (in Finnish). *Sitra* 2011:35.
- 9 Kork A, Vakkuri J. Matalan kynnyksen palvelumalli perusturvan palvelualueella (in Finnish). *Sitra* 2013:23.
- 10 Fairhall N, Sherrington C, Kurrle SE, et al. Effect of a multifactorial interdisciplinary intervention on mobility-related disability in frail older people: randomised controlled trial, *BMC Med* 2012;10:120 doi:10.1186/1741-7015-10-120 [doi] [published Online First: October 15].
- 11 Chan A, Tetzlaff JM, Altman DG, et al. SPIRIT 2013 statement: defining standard protocol items for clinical trials, *Ann Intern Med* 2013;158:200-7 doi:10.7326/0003-4819-158-3-201302050-00583 [published Online First: Feb 05,].
- 12 Mänty M, Heinonen A, Leinonen R, et al. Construct and predictive validity of a self-reported measure of preclinical mobility limitation, *Arch Phys Med Rehabil* 2007;88:1108-13.
- 13 Folstein MF, Folstein SE, McHugh PR. "Mini-mental state". A practical method for grading the cognitive state of patients for the clinician, *J Psychiatr Res* 1975;12:189-98.
- 14 Saunders JB, Aasland OG, Babor TF, et al. Development of the Alcohol Use Disorders Identification Test (AUDIT): WHO Collaborative Project on Early Detection of Persons with Harmful Alcohol Consumption--II, *Addiction* 1993;88:791-804 [published Online First: Jun].



- 1  
2  
3 1 15 Rollnick S, Miller WR. What is Motivational Interviewing? *Behavioural and Cognitive*  
4 2 *Psychotherapy* 1995;23:325-34 doi:10.1017/S135246580001643X [published Online First: /10].  
5  
6  
7 3 16 Bandura A. Social Foundations of Thoughts and Action: A Social Cognitive Theory.&nbsp;.  
8 4 Englewood Cliffs, New Jersey: Prentice-Hall 1986.  
9  
10 5 17 Prochaska JO, DiClemente CC. Stages of change in the modification of problem behaviors,  
11 6 *Prog Behav Modif* 1992;28:183-218.  
12  
13 7 18 Pajala S. IKINÄ-opas (in Finnish). *The Finnish National Institute for Health and Welfare*  
14 8 2018:183.  
15  
16  
17 9 19 Gardner MM, Buchner DM, Robertson MC, et al. Practical implementation of an exercise-  
18 10 based falls prevention programme, *Age Ageing* 2001;30:77-83 [published Online First: Jan].  
19  
20 11 20 Hauer K, Lamb SE, Jorstad EC, et al. Systematic review of definitions and methods of  
21 12 measuring falls in randomised controlled fall prevention trials, *Age Ageing* 2006;35:5-10  
22 13 doi:35/1/5 [pii] [published Online First: January 01].  
23  
24  
25 14 21 Husu P, Suni J, Vaha-Ypya H, et al. Objectively measured sedentary behavior and physical  
26 15 activity in a sample of Finnish adults: a cross-sectional study, *BMC Public Health* 2016;16:y  
27 16 doi:10.1186/s12889-016-3591-y [doi] [published Online First: September 01].  
28  
29  
30 17 22 Hukkanen H, Husu P, Sievanen H, et al. Aerobic physical activity assessed with  
31 18 accelerometer, diary, questionnaire, and interview in a Finnish population sample, *Scand J Med*  
32 19 *Sci Sports* 2018;28:2196-206 doi:10.1111/sms.13244 [doi] [published Online First: October 01].  
33  
34  
35 20 23 Waller K, Vaha-Ypya H, Tormakangas T, et al. Long-term leisure-time physical activity and  
36 21 other health habits as predictors of objectively monitored late-life physical activity - A 40-year  
37 22 twin study, *Sci Rep* 2018;8:7 doi:10.1038/s41598-018-27704-7 [doi] [published Online First:  
38 23 June 20].  
39  
40 24 24 Grimby G, Andren E, Daving Y, et al. Dependence and perceived difficulty in daily activities  
41 25 in community-living stroke survivors 2 years after stroke: a study of instrumental structures,  
42 26 *Stroke* 1998;29:1843-9.  
43  
44  
45 27 25 Rasinaho M, Hirvensalo M, Törmäkangas T, et al. Effect of physical activity counseling on  
46 28 physical activity of older people in Finland (ISRCTN 07330512), *Health Promot Int*  
47 29 2012;27:463-74 doi:10.1093/heapro/dar057 [published Online First: Dec].  
48  
49  
50 30 26 Podsiadlo D, Richardson S. The timed "Up & Go": a test of basic functional mobility for frail  
51 31 elderly persons, *J Am Geriatr Soc* 1991;39:142-8.  
52  
53 32 27 Guralnik JM, Simonsick EM, Ferrucci L, et al. A short physical performance battery  
54 33 assessing lower extremity function: association with self-reported disability and prediction of  
55 34 mortality and nursing home admission, *J Gerontol* 1994;49:85.  
56  
57  
58 35 28 Mathiowetz V, Kashman N, Volland G, et al. Grip and pinch strength: normative data for  
59 36 adults, *Arch Phys Med Rehabil* 1985;66:69-74 [published Online First: Feb].  
60

- 1  
2  
3 1 29 Anonymous . Development of the World Health Organization WHOQOL-BREF quality of  
4 2 life assessment. The WHOQOL Group, *Psychol Med* 1998;28:551-8 [published Online First:  
5 3 May].  
6  
7  
8 4 30 Kanis JA, Oden A, Johansson H, et al. FRAX and its applications to clinical practice, *Bone*  
9 5 2009;44:734-43 doi:10.1016/j.bone.2009.01.373 [published Online First: May].  
10  
11 6 31 Sheikh JI, Yesavage JA, Brooks JO, et al. Proposed factor structure of the Geriatric  
12 7 Depression Scale, *Int Psychogeriatr* 1991;3:23-8.  
13  
14 8 32 Powell LE, Myers AM. The Activities-specific Balance Confidence (ABC) Scale, *J Gerontol*  
15 9 *A Biol Sci Med Sci* 1995;50A:28.  
16  
17  
18 10 33 Huskisson EC. Measurement of pain, *Lancet* 1974;2:1127-31.  
19  
20 11 34 Miller-Davis C, Marden S, Leidy NK. The New York Heart Association Classes and  
21 12 functional status: what are we really measuring? *Heart Lung* 2006;35:217-24  
22 13 doi:10.1016/j.hrtlng.2006.01.003 [published Online First: Jul-Aug].  
23  
24 14 35 Anonymous . Orthostatic Test, *Scandinavian Journal of Clinical and Laboratory*  
25 15 *Investigation* 1984;44:38-54 doi:10.1080/00365518409169138 [published Online First: January  
26 16 1,].  
27  
28 17 36 Borg GA. Psychophysical bases of perceived exertion, *Med Sci Sports Exerc* 1982;14:377-81.  
29  
30 18 37 Moyé LA. Multiple Analyses in Clinical Trials: Fundamentals for Investigators. New York:  
31 19 Springer 2003.  
32  
33 20 38 Rantanen T, Portegijs E, Viljanen A, et al. Individual and environmental factors underlying  
34 21 life space of older people - study protocol and design of a cohort study on life-space mobility in  
35 22 old age (LISPE), *BMC Public Health* 2012;12:1018 doi:10.1186/1471-2458-12-1018 [published  
36 23 Online First: Nov 22,].  
37  
38 24 39 Gray AM, Clarke PM, Wolstenholme JL, et al. Applied Methods of Cost-effectiveness  
39 25 Analysis in Healthcare. Oxford, New York: Oxford University Press 2011.  
40  
41 26 40 Muthén LK, Muthén BO. Mplus user's guide: Statistical Analysis With Latent Variables. Los  
42 27 Angeles, CA: Muthén & Muthén 2009:850.  
43  
44  
45  
46  
47  
48  
49  
50  
51  
52  
53  
54  
55  
56  
57  
58  
59  
60

## 1 **AUTHORS' CONTRIBUTIONS**

2 Authorship is based on the ICMJE Recommendations (2013). RN is the responsible investigator  
3 who conceived the study and will oversee the data collection. The study was conceived with  
4 input from TaR, RD, UK, TT, HS, PK, AH, SS, LK, TiR, and OT. JE and SK are responsible for  
5 managing the data collection. JE wrote this protocol manuscript, the final version of which all  
6 other authors have revised and provided input according to their area of expertise. All authors  
7 approved the final version of the manuscript.

## 9 **FUNDING STATEMENT**

10 This work was supported by the Academy of Finland (grant number 289523).

## 12 **COMPETING INTERESTS STATEMENT**

13 Riku Nikander, University of Jyväskylä and GeroCenter foundation, Jyväskylä Finland, is a co-  
14 owner of the Devisys oy, Tampere Finland, a company that produces anti-slip devices for winter  
15 conditions.

## 17 **DATA AVAILABILITY STATEMENT**

18 De-identified participant data are available upon reasonable request from prof. Riku Nikander,  
19 riku.p.nikander@jyu.fi. Detailed IPD sharing statement is available at the ISRCTN registry  
20 (ISRCTN65406039).

## 22 **TABLES AND FIGURES**

23 Table 1. Content of the COSMOS 1 and 2 levels

24 Table 2. Outcome and other variables, methods and schedule of the assessments

25 Figure 1. Flow chart of the COSMOS study

26 Supplementary figure. Participant timeline

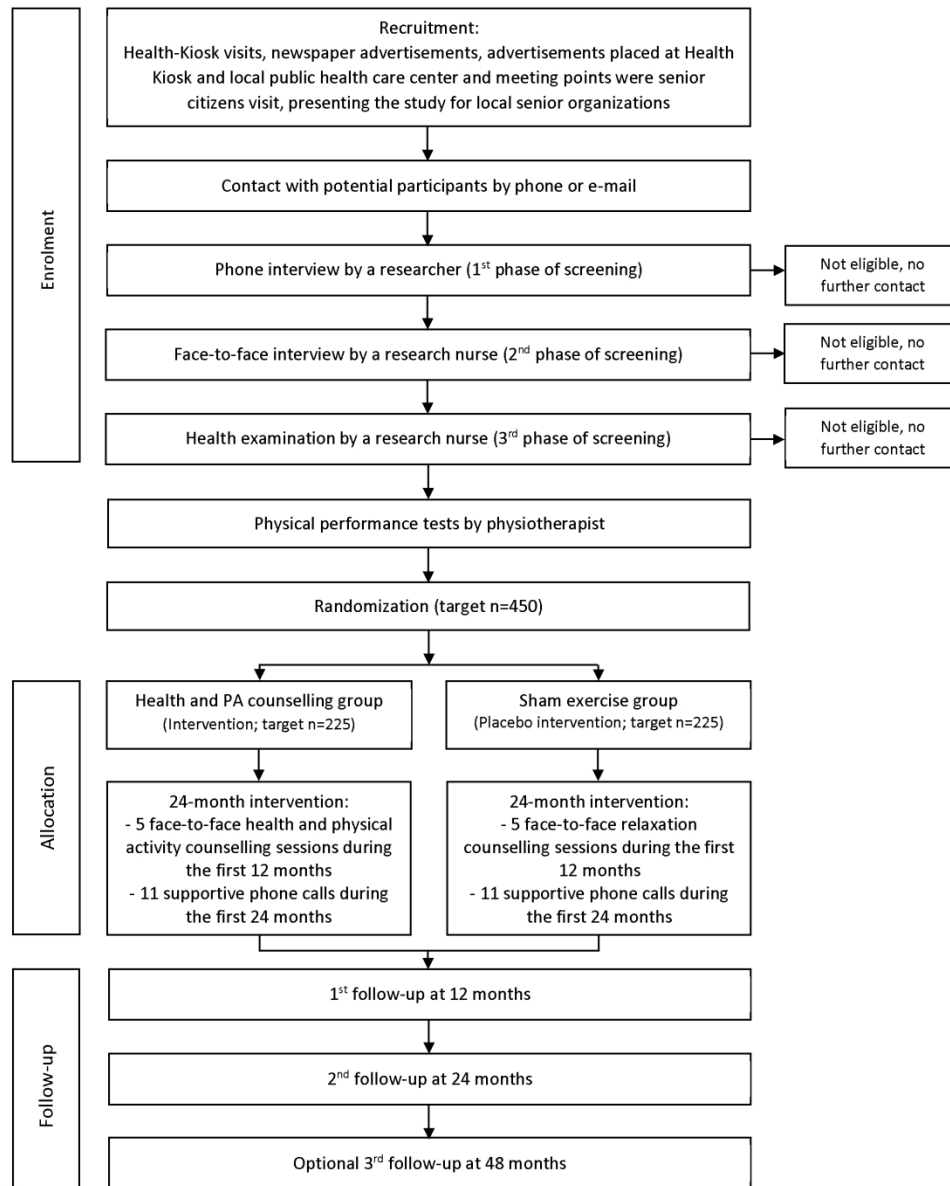

Figure 1. Flow chart of the COSMOS study

571x703mm (96 x 96 DPI)

1  
2  
3  
4  
5  
6  
7  
8  
9  
10  
11  
12  
13  
14  
15  
16  
17  
18  
19  
20  
21  
22  
23  
24  
25  
26  
27  
28  
29  
30  
31  
32  
33  
34  
35  
36  
37  
38  
39  
40  
41  
42  
43  
44  
45  
46  
47  
48  
49  
50  
51  
52  
53  
54  
55  
56  
57  
58  
59  
60

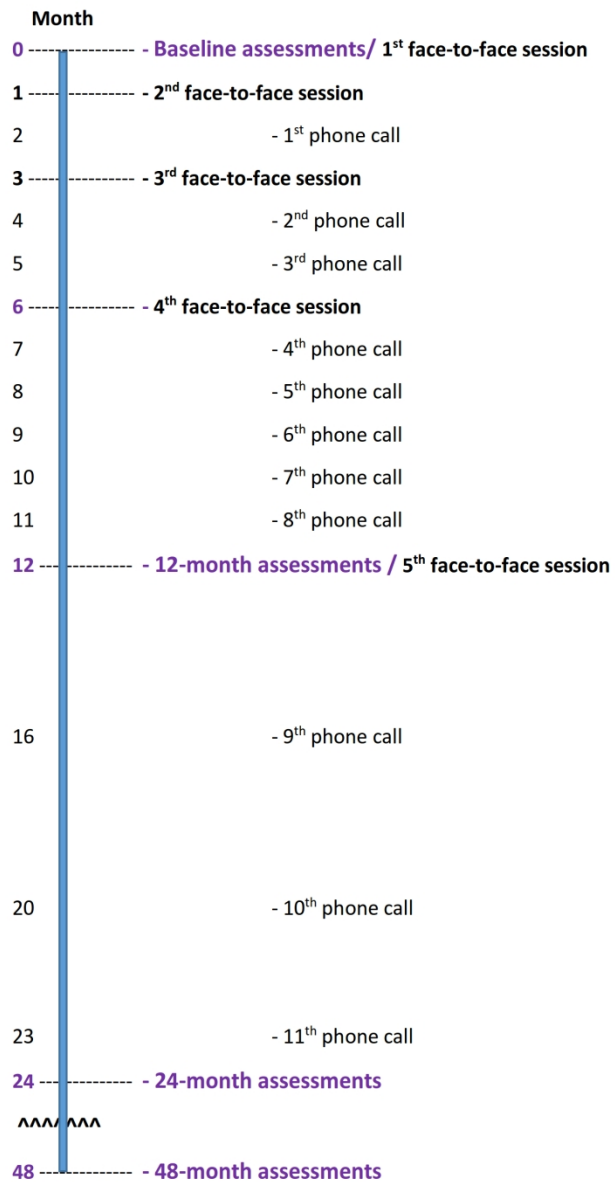

Supplementary figure. Participant timeline

350x663mm (96 x 96 DPI)

# Reporting checklist for protocol of a clinical trial.

Based on the SPIRIT guidelines.

## Instructions to authors

Complete this checklist by entering the page numbers from your manuscript where readers will find each of the items listed below.

Your article may not currently address all the items on the checklist. Please modify your text to include the missing information. If you are certain that an item does not apply, please write "n/a" and provide a short explanation.

Upload your completed checklist as an extra file when you submit to a journal.

In your methods section, say that you used the SPIRIT reporting guidelines, and cite them as:

Chan A-W, Tetzlaff JM, Altman DG, Laupacis A, Gøtzsche PC, Krleža-Jerić K, Hróbjartsson A, Mann H, Dickersin K, Berlin J, Doré C, Parulekar W, Summerskill W, Groves T, Schulz K, Sox H, Rockhold FW, Rennie D, Moher D. SPIRIT 2013 Statement: Defining standard protocol items for clinical trials. *Ann Intern Med.* 2013;158(3):200-207

|                    |                     |                                                                                                              | Page   |
|--------------------|---------------------|--------------------------------------------------------------------------------------------------------------|--------|
|                    |                     | Reporting Item                                                                                               | Number |
| Title              | <a href="#">#1</a>  | Descriptive title identifying the study design, population, interventions, and, if applicable, trial acronym | 1      |
| Trial registration | <a href="#">#2a</a> | Trial identifier and registry name. If not yet registered, name of intended registry                         | 2,6    |

|    |                     |                     |                                                          |      |
|----|---------------------|---------------------|----------------------------------------------------------|------|
| 1  | Trial registration: | <a href="#">#2b</a> | All items from the World Health Organization Trial       | 6    |
| 2  |                     |                     |                                                          |      |
| 3  | data set            |                     | Registration Data Set                                    |      |
| 4  |                     |                     |                                                          |      |
| 5  |                     |                     |                                                          |      |
| 6  | Protocol version    | <a href="#">#3</a>  | Date and version identifier                              | 1    |
| 7  |                     |                     |                                                          |      |
| 8  |                     |                     |                                                          |      |
| 9  | Funding             | <a href="#">#4</a>  | Sources and types of financial, material, and other      | 23   |
| 10 |                     |                     | support                                                  |      |
| 11 |                     |                     |                                                          |      |
| 12 |                     |                     |                                                          |      |
| 13 |                     |                     |                                                          |      |
| 14 |                     |                     |                                                          |      |
| 15 | Roles and           | <a href="#">#5a</a> | Names, affiliations, and roles of protocol contributors  | 1,23 |
| 16 | responsibilities:   |                     |                                                          |      |
| 17 |                     |                     |                                                          |      |
| 18 | contributorship     |                     |                                                          |      |
| 19 |                     |                     |                                                          |      |
| 20 |                     |                     |                                                          |      |
| 21 |                     |                     |                                                          |      |
| 22 | Roles and           | <a href="#">#5b</a> | Name and contact information for the trial sponsor       | 1,23 |
| 23 | responsibilities:   |                     |                                                          |      |
| 24 |                     |                     |                                                          |      |
| 25 | sponsor contact     |                     |                                                          |      |
| 26 |                     |                     |                                                          |      |
| 27 | information         |                     |                                                          |      |
| 28 |                     |                     |                                                          |      |
| 29 |                     |                     |                                                          |      |
| 30 |                     |                     |                                                          |      |
| 31 |                     |                     |                                                          |      |
| 32 | Roles and           | <a href="#">#5c</a> | Role of study sponsor and funders, if any, in study      | 17   |
| 33 | responsibilities:   |                     | design; collection, management, analysis, and            |      |
| 34 |                     |                     | interpretation of data; writing of the report; and the   |      |
| 35 | sponsor and funder  |                     | decision to submit the report for publication, including |      |
| 36 |                     |                     | whether they will have ultimate authority over any of    |      |
| 37 |                     |                     | these activities                                         |      |
| 38 |                     |                     |                                                          |      |
| 39 |                     |                     |                                                          |      |
| 40 |                     |                     |                                                          |      |
| 41 |                     |                     |                                                          |      |
| 42 |                     |                     |                                                          |      |
| 43 |                     |                     |                                                          |      |
| 44 |                     |                     |                                                          |      |
| 45 |                     |                     |                                                          |      |
| 46 |                     |                     |                                                          |      |
| 47 | Roles and           | <a href="#">#5d</a> | Composition, roles, and responsibilities of the          | 17   |
| 48 | responsibilities:   |                     | coordinating centre, steering committee, endpoint        |      |
| 49 |                     |                     | adjudication committee, data management team, and        |      |
| 50 | committees          |                     | other individuals or groups overseeing the trial, if     |      |
| 51 |                     |                     | applicable (see Item 21a for data monitoring committee)  |      |
| 52 |                     |                     |                                                          |      |
| 53 |                     |                     |                                                          |      |
| 54 |                     |                     |                                                          |      |
| 55 |                     |                     |                                                          |      |
| 56 |                     |                     |                                                          |      |
| 57 |                     |                     |                                                          |      |
| 58 |                     |                     |                                                          |      |
| 59 |                     |                     |                                                          |      |
| 60 |                     |                     |                                                          |      |

|    |                      |                      |                                                              |       |
|----|----------------------|----------------------|--------------------------------------------------------------|-------|
| 1  | Background and       | <a href="#">#6a</a>  | Description of research question and justification for       | 2,4-5 |
| 2  |                      |                      |                                                              |       |
| 3  | rationale            |                      | undertaking the trial, including summary of relevant         |       |
| 4  |                      |                      |                                                              |       |
| 5  |                      |                      | studies (published and unpublished) examining benefits       |       |
| 6  |                      |                      |                                                              |       |
| 7  |                      |                      | and harms for each intervention                              |       |
| 8  |                      |                      |                                                              |       |
| 9  |                      |                      |                                                              |       |
| 10 |                      |                      |                                                              |       |
| 11 | Background and       | <a href="#">#6b</a>  | Explanation for choice of comparators                        | 10-11 |
| 12 |                      |                      |                                                              |       |
| 13 | rationale: choice of |                      |                                                              |       |
| 14 |                      |                      |                                                              |       |
| 15 | comparators          |                      |                                                              |       |
| 16 |                      |                      |                                                              |       |
| 17 |                      |                      |                                                              |       |
| 18 | Objectives           | <a href="#">#7</a>   | Specific objectives or hypotheses                            | 5     |
| 19 |                      |                      |                                                              |       |
| 20 |                      |                      |                                                              |       |
| 21 |                      |                      |                                                              |       |
| 22 | Trial design         | <a href="#">#8</a>   | Description of trial design including type of trial (eg,     | 6     |
| 23 |                      |                      |                                                              |       |
| 24 |                      |                      | parallel group, crossover, factorial, single group),         |       |
| 25 |                      |                      |                                                              |       |
| 26 |                      |                      | allocation ratio, and framework (eg, superiority,            |       |
| 27 |                      |                      |                                                              |       |
| 28 |                      |                      | equivalence, non-inferiority, exploratory)                   |       |
| 29 |                      |                      |                                                              |       |
| 30 |                      |                      |                                                              |       |
| 31 |                      |                      |                                                              |       |
| 32 | Study setting        | <a href="#">#9</a>   | Description of study settings (eg, community clinic,         | 6     |
| 33 |                      |                      |                                                              |       |
| 34 |                      |                      | academic hospital) and list of countries where data will be  |       |
| 35 |                      |                      |                                                              |       |
| 36 |                      |                      | collected. Reference to where list of study sites can be     |       |
| 37 |                      |                      |                                                              |       |
| 38 |                      |                      | obtained                                                     |       |
| 39 |                      |                      |                                                              |       |
| 40 |                      |                      |                                                              |       |
| 41 |                      |                      |                                                              |       |
| 42 | Eligibility criteria | <a href="#">#10</a>  | Inclusion and exclusion criteria for participants. If        | 6-7   |
| 43 |                      |                      |                                                              |       |
| 44 |                      |                      | applicable, eligibility criteria for study centres and       |       |
| 45 |                      |                      |                                                              |       |
| 46 |                      |                      | individuals who will perform the interventions (eg,          |       |
| 47 |                      |                      |                                                              |       |
| 48 |                      |                      | surgeons, psychotherapists)                                  |       |
| 49 |                      |                      |                                                              |       |
| 50 |                      |                      |                                                              |       |
| 51 | Interventions:       | <a href="#">#11a</a> | Interventions for each group with sufficient detail to allow | 8-11  |
| 52 |                      |                      |                                                              |       |
| 53 | description          |                      | replication, including how and when they will be             |       |
| 54 |                      |                      |                                                              |       |
| 55 |                      |                      | administered                                                 |       |
| 56 |                      |                      |                                                              |       |
| 57 |                      |                      |                                                              |       |
| 58 |                      |                      |                                                              |       |
| 59 |                      |                      |                                                              |       |
| 60 |                      |                      |                                                              |       |



|    |                      |                      |                                                            |            |
|----|----------------------|----------------------|------------------------------------------------------------|------------|
| 1  | Interventions:       | <a href="#">#11b</a> | Criteria for discontinuing or modifying allocated          | 9-11       |
| 2  |                      |                      |                                                            |            |
| 3  | modifications        |                      | interventions for a given trial participant (eg, drug dose |            |
| 4  |                      |                      | change in response to harms, participant request, or       |            |
| 5  |                      |                      | improving / worsening disease)                             |            |
| 6  |                      |                      |                                                            |            |
| 7  |                      |                      |                                                            |            |
| 8  |                      |                      |                                                            |            |
| 9  |                      |                      |                                                            |            |
| 10 |                      |                      |                                                            |            |
| 11 | Interventions:       | <a href="#">#11c</a> | Strategies to improve adherence to intervention            | 9-11       |
| 12 |                      |                      |                                                            |            |
| 13 | adherence            |                      | protocols, and any procedures for monitoring adherence     |            |
| 14 |                      |                      | (eg, drug tablet return; laboratory tests)                 |            |
| 15 |                      |                      |                                                            |            |
| 16 |                      |                      |                                                            |            |
| 17 |                      |                      |                                                            |            |
| 18 |                      |                      |                                                            |            |
| 19 | Interventions:       | <a href="#">#11d</a> | Relevant concomitant care and interventions that are       | 9-11       |
| 20 |                      |                      | permitted or prohibited during the trial                   |            |
| 21 | concomitant care     |                      |                                                            |            |
| 22 |                      |                      |                                                            |            |
| 23 |                      |                      |                                                            |            |
| 24 | Outcomes             | <a href="#">#12</a>  | Primary, secondary, and other outcomes, including the      | 11-15      |
| 25 |                      |                      | specific measurement variable (eg, systolic blood          |            |
| 26 |                      |                      | pressure), analysis metric (eg, change from baseline,      |            |
| 27 |                      |                      | final value, time to event), method of aggregation (eg,    |            |
| 28 |                      |                      | median, proportion), and time point for each outcome.      |            |
| 29 |                      |                      | Explanation of the clinical relevance of chosen efficacy   |            |
| 30 |                      |                      | and harm outcomes is strongly recommended                  |            |
| 31 |                      |                      |                                                            |            |
| 32 |                      |                      |                                                            |            |
| 33 |                      |                      |                                                            |            |
| 34 |                      |                      |                                                            |            |
| 35 |                      |                      |                                                            |            |
| 36 |                      |                      |                                                            |            |
| 37 |                      |                      |                                                            |            |
| 38 |                      |                      |                                                            |            |
| 39 |                      |                      |                                                            |            |
| 40 |                      |                      |                                                            |            |
| 41 | Participant timeline | <a href="#">#13</a>  | Time schedule of enrolment, interventions (including any   | 8,         |
| 42 |                      |                      | run-ins and washouts), assessments, and visits for         |            |
| 43 |                      |                      | participants. A schematic diagram is highly                | suppl.fig. |
| 44 |                      |                      | recommended (see Figure)                                   |            |
| 45 |                      |                      |                                                            |            |
| 46 |                      |                      |                                                            |            |
| 47 |                      |                      |                                                            |            |
| 48 |                      |                      |                                                            |            |
| 49 |                      |                      |                                                            |            |
| 50 |                      |                      |                                                            |            |
| 51 | Sample size          | <a href="#">#14</a>  | Estimated number of participants needed to achieve         | 2,15       |
| 52 |                      |                      | study objectives and how it was determined, including      |            |
| 53 |                      |                      | clinical and statistical assumptions supporting any        |            |
| 54 |                      |                      | sample size calculations                                   |            |
| 55 |                      |                      |                                                            |            |
| 56 |                      |                      |                                                            |            |
| 57 |                      |                      |                                                            |            |
| 58 |                      |                      |                                                            |            |
| 59 |                      |                      |                                                            |            |
| 60 |                      |                      |                                                            |            |

|    |                      |                      |                                                            |     |
|----|----------------------|----------------------|------------------------------------------------------------|-----|
| 1  | Recruitment          | <a href="#">#15</a>  | Strategies for achieving adequate participant enrolment    | 7   |
| 2  |                      |                      |                                                            |     |
| 3  |                      |                      | to reach target sample size                                |     |
| 4  |                      |                      |                                                            |     |
| 5  |                      |                      |                                                            |     |
| 6  | Allocation: sequence | <a href="#">#16a</a> | Method of generating the allocation sequence (eg,          | 8   |
| 7  | generation           |                      | computer-generated random numbers), and list of any        |     |
| 8  |                      |                      | factors for stratification. To reduce predictability of a  |     |
| 9  |                      |                      | random sequence, details of any planned restriction (eg,   |     |
| 10 |                      |                      |                                                            |     |
| 11 |                      |                      | blocking) should be provided in a separate document that   |     |
| 12 |                      |                      | is unavailable to those who enrol participants or assign   |     |
| 13 |                      |                      | interventions                                              |     |
| 14 |                      |                      |                                                            |     |
| 15 |                      |                      |                                                            |     |
| 16 | Allocation           | <a href="#">#16b</a> | Mechanism of implementing the allocation sequence (eg,     | 8   |
| 17 | concealment          |                      | central telephone; sequentially numbered, opaque,          |     |
| 18 | mechanism            |                      | sealed envelopes), describing any steps to conceal the     |     |
| 19 |                      |                      | sequence until interventions are assigned                  |     |
| 20 |                      |                      |                                                            |     |
| 21 |                      |                      |                                                            |     |
| 22 |                      |                      |                                                            |     |
| 23 | Allocation:          | <a href="#">#16c</a> | Who will generate the allocation sequence, who will enrol  | 8   |
| 24 | implementation       |                      | participants, and who will assign participants to          |     |
| 25 |                      |                      | interventions                                              |     |
| 26 |                      |                      |                                                            |     |
| 27 |                      |                      |                                                            |     |
| 28 |                      |                      |                                                            |     |
| 29 |                      |                      |                                                            |     |
| 30 |                      |                      |                                                            |     |
| 31 |                      |                      |                                                            |     |
| 32 |                      |                      |                                                            |     |
| 33 | Blinding (masking)   | <a href="#">#17a</a> | Who will be blinded after assignment to interventions (eg, | 8   |
| 34 |                      |                      | trial participants, care providers, outcome assessors,     |     |
| 35 |                      |                      | data analysts), and how                                    |     |
| 36 |                      |                      |                                                            |     |
| 37 |                      |                      |                                                            |     |
| 38 |                      |                      |                                                            |     |
| 39 |                      |                      |                                                            |     |
| 40 |                      |                      |                                                            |     |
| 41 | Blinding (masking):  | <a href="#">#17b</a> | If blinded, circumstances under which unblinding is        | n/a |
| 42 | emergency            |                      | permissible, and procedure for revealing a participant's   |     |
| 43 | unblinding           |                      | allocated intervention during the trial                    |     |
| 44 |                      |                      |                                                            |     |
| 45 |                      |                      |                                                            |     |
| 46 |                      |                      |                                                            |     |
| 47 |                      |                      |                                                            |     |
| 48 |                      |                      |                                                            |     |
| 49 |                      |                      |                                                            |     |
| 50 |                      |                      |                                                            |     |
| 51 |                      |                      |                                                            |     |
| 52 |                      |                      |                                                            |     |
| 53 |                      |                      |                                                            |     |
| 54 |                      |                      |                                                            |     |
| 55 |                      |                      |                                                            |     |
| 56 |                      |                      |                                                            |     |
| 57 |                      |                      |                                                            |     |
| 58 |                      |                      |                                                            |     |
| 59 |                      |                      |                                                            |     |
| 60 |                      |                      |                                                            |     |

|    |                        |                      |                                                                |       |
|----|------------------------|----------------------|----------------------------------------------------------------|-------|
| 1  | Data collection plan   | <a href="#">#18a</a> | Plans for assessment and collection of outcome,                | 16-17 |
| 2  |                        |                      | baseline, and other trial data, including any related          |       |
| 3  |                        |                      | processes to promote data quality (eg, duplicate               |       |
| 4  |                        |                      | measurements, training of assessors) and a description         |       |
| 5  |                        |                      | of study instruments (eg, questionnaires, laboratory tests)    |       |
| 6  |                        |                      | along with their reliability and validity, if known.           |       |
| 7  |                        |                      |                                                                |       |
| 8  |                        |                      | Reference to where data collection forms can be found, if      |       |
| 9  |                        |                      | not in the protocol                                            |       |
| 10 |                        |                      |                                                                |       |
| 11 | Data collection plan:  | <a href="#">#18b</a> | Plans to promote participant retention and complete            | 16-17 |
| 12 | retention              |                      | follow-up, including list of any outcome data to be            |       |
| 13 |                        |                      | collected for participants who discontinue or deviate from     |       |
| 14 |                        |                      | intervention protocols                                         |       |
| 15 |                        |                      |                                                                |       |
| 16 |                        |                      |                                                                |       |
| 17 |                        |                      |                                                                |       |
| 18 |                        |                      |                                                                |       |
| 19 |                        |                      |                                                                |       |
| 20 | Data management        | <a href="#">#19</a>  | Plans for data entry, coding, security, and storage,           | 16-17 |
| 21 |                        |                      | including any related processes to promote data quality        |       |
| 22 |                        |                      | (eg, double data entry; range checks for data values).         |       |
| 23 |                        |                      | Reference to where details of data management                  |       |
| 24 |                        |                      | procedures can be found, if not in the protocol                |       |
| 25 |                        |                      |                                                                |       |
| 26 |                        |                      |                                                                |       |
| 27 |                        |                      |                                                                |       |
| 28 |                        |                      |                                                                |       |
| 29 |                        |                      |                                                                |       |
| 30 | Statistics: outcomes   | <a href="#">#20a</a> | Statistical methods for analysing primary and secondary        | 16-17 |
| 31 |                        |                      | outcomes. Reference to where other details of the              |       |
| 32 |                        |                      | statistical analysis plan can be found, if not in the protocol |       |
| 33 |                        |                      |                                                                |       |
| 34 |                        |                      |                                                                |       |
| 35 |                        |                      |                                                                |       |
| 36 |                        |                      |                                                                |       |
| 37 |                        |                      |                                                                |       |
| 38 |                        |                      |                                                                |       |
| 39 |                        |                      |                                                                |       |
| 40 |                        |                      |                                                                |       |
| 41 |                        |                      |                                                                |       |
| 42 | Statistics: additional | <a href="#">#20b</a> | Methods for any additional analyses (eg, subgroup and          | 16-17 |
| 43 | analyses               |                      | adjusted analyses)                                             |       |
| 44 |                        |                      |                                                                |       |
| 45 |                        |                      |                                                                |       |
| 46 |                        |                      |                                                                |       |
| 47 |                        |                      |                                                                |       |
| 48 |                        |                      |                                                                |       |
| 49 |                        |                      |                                                                |       |
| 50 |                        |                      |                                                                |       |
| 51 |                        |                      |                                                                |       |
| 52 |                        |                      |                                                                |       |
| 53 |                        |                      |                                                                |       |
| 54 |                        |                      |                                                                |       |
| 55 |                        |                      |                                                                |       |
| 56 |                        |                      |                                                                |       |
| 57 |                        |                      |                                                                |       |
| 58 |                        |                      |                                                                |       |
| 59 |                        |                      |                                                                |       |
| 60 |                        |                      |                                                                |       |

|    |                      |                      |                                                             |       |
|----|----------------------|----------------------|-------------------------------------------------------------|-------|
| 1  | Statistics: analysis | <a href="#">#20c</a> | Definition of analysis population relating to protocol non- | 16-17 |
| 2  |                      |                      |                                                             |       |
| 3  | population and       |                      | adherence (eg, as randomised analysis), and any             |       |
| 4  |                      |                      |                                                             |       |
| 5  | missing data         |                      | statistical methods to handle missing data (eg, multiple    |       |
| 6  |                      |                      |                                                             |       |
| 7  |                      |                      | imputation)                                                 |       |
| 8  |                      |                      |                                                             |       |
| 9  |                      |                      |                                                             |       |
| 10 |                      |                      |                                                             |       |
| 11 | Data monitoring:     | <a href="#">#21a</a> | Composition of data monitoring committee (DMC);             | 17    |
| 12 |                      |                      |                                                             |       |
| 13 | formal committee     |                      | summary of its role and reporting structure; statement of   |       |
| 14 |                      |                      |                                                             |       |
| 15 |                      |                      | whether it is independent from the sponsor and              |       |
| 16 |                      |                      | competing interests; and reference to where further         |       |
| 17 |                      |                      | details about its charter can be found, if not in the       |       |
| 18 |                      |                      | protocol. Alternatively, an explanation of why a DMC is     |       |
| 19 |                      |                      | not needed                                                  |       |
| 20 |                      |                      |                                                             |       |
| 21 |                      |                      |                                                             |       |
| 22 |                      |                      |                                                             |       |
| 23 |                      |                      |                                                             |       |
| 24 |                      |                      |                                                             |       |
| 25 |                      |                      |                                                             |       |
| 26 |                      |                      |                                                             |       |
| 27 |                      |                      |                                                             |       |
| 28 | Data monitoring:     | <a href="#">#21b</a> | Description of any interim analyses and stopping            | n/a   |
| 29 |                      |                      |                                                             |       |
| 30 | interim analysis     |                      | guidelines, including who will have access to these         |       |
| 31 |                      |                      |                                                             |       |
| 32 |                      |                      | interim results and make the final decision to terminate    |       |
| 33 |                      |                      |                                                             |       |
| 34 |                      |                      | the trial                                                   |       |
| 35 |                      |                      |                                                             |       |
| 36 |                      |                      |                                                             |       |
| 37 |                      |                      |                                                             |       |
| 38 | Harms                | <a href="#">#22</a>  | Plans for collecting, assessing, reporting, and managing    | 18    |
| 39 |                      |                      |                                                             |       |
| 40 |                      |                      | solicited and spontaneously reported adverse events and     |       |
| 41 |                      |                      |                                                             |       |
| 42 |                      |                      | other unintended effects of trial interventions or trial    |       |
| 43 |                      |                      |                                                             |       |
| 44 |                      |                      | conduct                                                     |       |
| 45 |                      |                      |                                                             |       |
| 46 |                      |                      |                                                             |       |
| 47 |                      |                      |                                                             |       |
| 48 | Auditing             | <a href="#">#23</a>  | Frequency and procedures for auditing trial conduct, if     | 17    |
| 49 |                      |                      |                                                             |       |
| 50 |                      |                      | any, and whether the process will be independent from       |       |
| 51 |                      |                      |                                                             |       |
| 52 |                      |                      | investigators and the sponsor                               |       |
| 53 |                      |                      |                                                             |       |
| 54 |                      |                      |                                                             |       |
| 55 | Research ethics      | <a href="#">#24</a>  | Plans for seeking research ethics committee / institutional | 2,18  |
| 56 |                      |                      |                                                             |       |
| 57 | approval             |                      | review board (REC / IRB) approval                           |       |
| 58 |                      |                      |                                                             |       |
| 59 |                      |                      |                                                             |       |
| 60 |                      |                      |                                                             |       |

|    |                    |                      |                                                                |     |
|----|--------------------|----------------------|----------------------------------------------------------------|-----|
| 1  | Protocol           | <a href="#">#25</a>  | Plans for communicating important protocol modifications       | 18  |
| 2  |                    |                      |                                                                |     |
| 3  | amendments         |                      | (eg, changes to eligibility criteria, outcomes, analyses) to   |     |
| 4  |                    |                      | relevant parties (eg, investigators, REC / IRBs, trial         |     |
| 5  |                    |                      | participants, trial registries, journals, regulators)          |     |
| 6  |                    |                      |                                                                |     |
| 7  |                    |                      |                                                                |     |
| 8  |                    |                      |                                                                |     |
| 9  |                    |                      |                                                                |     |
| 10 |                    |                      |                                                                |     |
| 11 | Consent or assent  | <a href="#">#26a</a> | Who will obtain informed consent or assent from potential      | 7   |
| 12 |                    |                      | trial participants or authorised surrogates, and how (see      |     |
| 13 |                    |                      | Item 32)                                                       |     |
| 14 |                    |                      |                                                                |     |
| 15 |                    |                      |                                                                |     |
| 16 |                    |                      |                                                                |     |
| 17 |                    |                      |                                                                |     |
| 18 |                    |                      |                                                                |     |
| 19 | Consent or assent: | <a href="#">#26b</a> | Additional consent provisions for collection and use of        | n/a |
| 20 | ancillary studies  |                      | participant data and biological specimens in ancillary         |     |
| 21 |                    |                      | studies, if applicable                                         |     |
| 22 |                    |                      |                                                                |     |
| 23 |                    |                      |                                                                |     |
| 24 |                    |                      |                                                                |     |
| 25 |                    |                      |                                                                |     |
| 26 | Confidentiality    | <a href="#">#27</a>  | How personal information about potential and enrolled          | 18  |
| 27 |                    |                      | participants will be collected, shared, and maintained in      |     |
| 28 |                    |                      | order to protect confidentiality before, during, and after     |     |
| 29 |                    |                      | the trial                                                      |     |
| 30 |                    |                      |                                                                |     |
| 31 |                    |                      |                                                                |     |
| 32 |                    |                      |                                                                |     |
| 33 |                    |                      |                                                                |     |
| 34 |                    |                      |                                                                |     |
| 35 |                    |                      |                                                                |     |
| 36 | Declaration of     | <a href="#">#28</a>  | Financial and other competing interests for principal          | 23  |
| 37 | interests          |                      | investigators for the overall trial and each study site        |     |
| 38 |                    |                      |                                                                |     |
| 39 |                    |                      |                                                                |     |
| 40 |                    |                      |                                                                |     |
| 41 |                    |                      |                                                                |     |
| 42 | Data access        | <a href="#">#29</a>  | Statement of who will have access to the final trial           | 23  |
| 43 |                    |                      | dataset, and disclosure of contractual agreements that         |     |
| 44 |                    |                      | limit such access for investigators                            |     |
| 45 |                    |                      |                                                                |     |
| 46 |                    |                      |                                                                |     |
| 47 |                    |                      |                                                                |     |
| 48 |                    |                      |                                                                |     |
| 49 | Ancillary and post | <a href="#">#30</a>  | Provisions, if any, for ancillary and post-trial care, and for | n/a |
| 50 | trial care         |                      | compensation to those who suffer harm from trial               |     |
| 51 |                    |                      | participation                                                  |     |
| 52 |                    |                      |                                                                |     |
| 53 |                    |                      |                                                                |     |
| 54 |                    |                      |                                                                |     |
| 55 |                    |                      |                                                                |     |
| 56 |                    |                      |                                                                |     |
| 57 |                    |                      |                                                                |     |
| 58 |                    |                      |                                                                |     |
| 59 |                    |                      |                                                                |     |
| 60 |                    |                      |                                                                |     |

|    |                       |                      |                                                               |     |
|----|-----------------------|----------------------|---------------------------------------------------------------|-----|
| 1  | Dissemination         | <a href="#">#31a</a> | Plans for investigators and sponsor to communicate trial      | 18  |
| 2  |                       |                      |                                                               |     |
| 3  | policy: trial results |                      | results to participants, healthcare professionals, the        |     |
| 4  |                       |                      | public, and other relevant groups (eg, via publication,       |     |
| 5  |                       |                      | reporting in results databases, or other data sharing         |     |
| 6  |                       |                      | arrangements), including any publication restrictions         |     |
| 7  |                       |                      |                                                               |     |
| 8  |                       |                      |                                                               |     |
| 9  |                       |                      |                                                               |     |
| 10 |                       |                      |                                                               |     |
| 11 |                       |                      |                                                               |     |
| 12 |                       |                      |                                                               |     |
| 13 | Dissemination         | <a href="#">#31b</a> | Authorship eligibility guidelines and any intended use of     | 23  |
| 14 |                       |                      |                                                               |     |
| 15 | policy: authorship    |                      | professional writers                                          |     |
| 16 |                       |                      |                                                               |     |
| 17 |                       |                      |                                                               |     |
| 18 |                       |                      |                                                               |     |
| 19 | Dissemination         | <a href="#">#31c</a> | Plans, if any, for granting public access to the full         | ,23 |
| 20 |                       |                      |                                                               |     |
| 21 | policy: reproducible  |                      | protocol, participant-level dataset, and statistical code     |     |
| 22 |                       |                      |                                                               |     |
| 23 | research              |                      |                                                               |     |
| 24 |                       |                      |                                                               |     |
| 25 |                       |                      |                                                               |     |
| 26 | Informed consent      | <a href="#">#32</a>  | Model consent form and other related documentation            | n/a |
| 27 |                       |                      |                                                               |     |
| 28 | materials             |                      | given to participants and authorised surrogates               |     |
| 29 |                       |                      |                                                               |     |
| 30 |                       |                      |                                                               |     |
| 31 |                       |                      |                                                               |     |
| 32 | Biological            | <a href="#">#33</a>  | Plans for collection, laboratory evaluation, and storage of   | n/a |
| 33 |                       |                      |                                                               |     |
| 34 | specimens             |                      | biological specimens for genetic or molecular analysis in     |     |
| 35 |                       |                      |                                                               |     |
| 36 |                       |                      |                                                               |     |
| 37 |                       |                      | the current trial and for future use in ancillary studies, if |     |
| 38 |                       |                      |                                                               |     |
| 39 |                       |                      | applicable                                                    |     |
| 40 |                       |                      |                                                               |     |

41  
 42 The SPIRIT checklist is distributed under the terms of the Creative Commons Attribution License CC-  
 43 BY-ND 3.0. This checklist can be completed online using <https://www.goodreports.org/>, a tool made  
 44 by the [EQUATOR Network](#) in collaboration with [Penelope.ai](#)  
 45  
 46  
 47  
 48  
 49  
 50  
 51  
 52  
 53  
 54  
 55  
 56  
 57  
 58  
 59  
 60

# BMJ Open

## Counselling for physical activity, life-space mobility and falls prevention in old age (COSMOS): Protocol of a randomized controlled trial (ISRCTN65406039)

|                                 |                                                                                                                                                                                                                                                                                                                                                                                                                                                                                                                                                                                                                                                                                                                                                                                                                                                                                                                                                                                                                                                                                                                                                                                                                                                                                                                                                                                                                                                                                                                                                                                                                                                       |
|---------------------------------|-------------------------------------------------------------------------------------------------------------------------------------------------------------------------------------------------------------------------------------------------------------------------------------------------------------------------------------------------------------------------------------------------------------------------------------------------------------------------------------------------------------------------------------------------------------------------------------------------------------------------------------------------------------------------------------------------------------------------------------------------------------------------------------------------------------------------------------------------------------------------------------------------------------------------------------------------------------------------------------------------------------------------------------------------------------------------------------------------------------------------------------------------------------------------------------------------------------------------------------------------------------------------------------------------------------------------------------------------------------------------------------------------------------------------------------------------------------------------------------------------------------------------------------------------------------------------------------------------------------------------------------------------------|
| Journal:                        | <i>BMJ Open</i>                                                                                                                                                                                                                                                                                                                                                                                                                                                                                                                                                                                                                                                                                                                                                                                                                                                                                                                                                                                                                                                                                                                                                                                                                                                                                                                                                                                                                                                                                                                                                                                                                                       |
| Manuscript ID                   | bmjopen-2019-029682.R2                                                                                                                                                                                                                                                                                                                                                                                                                                                                                                                                                                                                                                                                                                                                                                                                                                                                                                                                                                                                                                                                                                                                                                                                                                                                                                                                                                                                                                                                                                                                                                                                                                |
| Article Type:                   | Protocol                                                                                                                                                                                                                                                                                                                                                                                                                                                                                                                                                                                                                                                                                                                                                                                                                                                                                                                                                                                                                                                                                                                                                                                                                                                                                                                                                                                                                                                                                                                                                                                                                                              |
| Date Submitted by the Author:   | 24-Jul-2019                                                                                                                                                                                                                                                                                                                                                                                                                                                                                                                                                                                                                                                                                                                                                                                                                                                                                                                                                                                                                                                                                                                                                                                                                                                                                                                                                                                                                                                                                                                                                                                                                                           |
| Complete List of Authors:       | Edgren, Johanna; Jyväskylän Yliopisto, Faculty of Sport and Health Sciences; Jyväskylän Yliopisto, Faculty of Sport and Health Sciences, Gerontology Research Center<br>Karinkanta, Saija; UKK Institute for Health Promotion Research<br>Rantanen, Taina; University of Jyväskylä, Faculty of Sport and Health Sciences; Jyväskylän Yliopisto, Faculty of Sport and Health Sciences, Gerontology Research Center<br>Daly, Robin ; Deakin University, Institute for Physical Activity and Nutrition<br>Kujala, Urho; Jyväskylän Yliopisto, Faculty of Sport and Health Sciences<br>Törmäkangas, Timo; Jyväskylän Yliopisto, Faculty of Sport and Health Sciences; Jyväskylän Yliopisto, Faculty of Sport and Health Sciences, Gerontology Research Center<br>Sievänen, Harri; UKK Institute for Health Promotion Research<br>Kannus, Pekka; UKK Institute for Health Promotion Research<br>Heinonen, Ari; University of Jyväskylä, Faculty of Sport and Health Sciences<br>Sipilä, Sarianna; Jyväskylän Yliopisto, Faculty of Sport and Health Sciences; Jyväskylän Yliopisto, Faculty of Sport and Health Sciences, Gerontology Research Center<br>Kannas, Lasse ; Jyväskylän Yliopisto, Faculty of Sport and Health Sciences<br>Rantalainen, Timo; Jyväskylän Yliopisto, Faculty of Sport and Health Sciences<br>Teittinen, Outi; Jyväskylän Ammattikorkeakoulu, Research and Development, School of Health and Social Studies; Central Finland Centre for Economic Development, Transport and the Environment<br>Nikander , R ; Jyväskylän Yliopisto, Faculty of Sport and Health Sciences; GeroCenter Foundation for Aging Research & Development |
| <b>Primary Subject Heading</b>: | Public health                                                                                                                                                                                                                                                                                                                                                                                                                                                                                                                                                                                                                                                                                                                                                                                                                                                                                                                                                                                                                                                                                                                                                                                                                                                                                                                                                                                                                                                                                                                                                                                                                                         |
| Secondary Subject Heading:      | Rehabilitation medicine, Sports and exercise medicine                                                                                                                                                                                                                                                                                                                                                                                                                                                                                                                                                                                                                                                                                                                                                                                                                                                                                                                                                                                                                                                                                                                                                                                                                                                                                                                                                                                                                                                                                                                                                                                                 |
| Keywords:                       | older people, physical activity, falls, counselling, life-space mobility, injuries                                                                                                                                                                                                                                                                                                                                                                                                                                                                                                                                                                                                                                                                                                                                                                                                                                                                                                                                                                                                                                                                                                                                                                                                                                                                                                                                                                                                                                                                                                                                                                    |
|                                 |                                                                                                                                                                                                                                                                                                                                                                                                                                                                                                                                                                                                                                                                                                                                                                                                                                                                                                                                                                                                                                                                                                                                                                                                                                                                                                                                                                                                                                                                                                                                                                                                                                                       |

1  
2  
3  
4  
5  
6  
7  
8  
9  
10  
11  
12  
13  
14  
15  
16  
17  
18  
19  
20  
21  
22  
23  
24  
25  
26  
27  
28  
29  
30  
31  
32  
33  
34  
35  
36  
37  
38  
39  
40  
41  
42  
43  
44  
45  
46  
47  
48  
49  
50  
51  
52  
53  
54  
55  
56  
57  
58  
59  
60





1  
2  
3 1 **Counselling for physical activity, life-space mobility and falls prevention in old**  
4 2 **age (COSMOS): Protocol of a randomized controlled trial (ISRCTN65406039)**

5  
6  
7 3 Edgren Johanna<sup>1,2</sup>, Karinkanta Saija<sup>3</sup>, Rantanen Taina<sup>1,2</sup>, Daly Robin M<sup>4</sup>, Kujala Urho M<sup>1</sup>,  
8 4 Törmäkangas Timo<sup>1,2</sup>, Sievänen Harri<sup>3</sup>, Kannus Pekka<sup>3</sup>, Heinonen Ari<sup>1</sup>, Sipilä Sarianna<sup>1,2</sup>,  
9 5 Kannas Lasse<sup>1</sup>, Rantalainen Timo<sup>1</sup>, Teittinen Outi<sup>5,6</sup>, Nikander Riku<sup>1,2,7</sup>

10  
11 6  
12 7 <sup>1</sup>Faculty of Sport and Health Sciences, University of Jyväskylä, Jyväskylä, Finland

13 8 <sup>2</sup>Faculty of Sport and Health Sciences, Gerontology Research Center, University of Jyväskylä,  
14 9 Jyväskylä, Finland

15 10 <sup>3</sup>UKK Institute for Health Promotion Research, Tampere, Finland

16 11 <sup>4</sup>Institute for Physical Activity and Nutrition, Deakin University, Geelong, Victoria, Australia

17 12 <sup>5</sup>Research and Development, School of Health and Social Studies, JAMK University of Applied  
18 13 Sciences, Jyväskylä, Finland

19 14 <sup>6</sup>Central Finland Centre for Economic Development, Transport and the Environment, Jyväskylä,  
20 15 Finland

21 16 <sup>7</sup>GeroCenter Foundation for Aging Research & Development, Jyväskylä, Finland

22 17  
23 18  
24 19 **E-mails:**

25 20 johanna.edgren@jyu.fi

26 21 saija.karinkanta@ukkinstituutti.fi

27 22 taina.rantanen@jyu.fi

28 23 robin.daly@deakin.edu.au

29 24 urho.m.kujala@jyu.fi

30 25 timo.tormakangas@jyu.fi

31 26 harri.sievanen@ukkinstituutti.fi

32 27 pekka.kannus@ukkinstituutti.fi

33 28 ari.o.heinonen@jyu.fi

34 29 sarianna.sipila@jyu.fi

35 30 lasse.k.kannas@jyu.fi

36 31 timo.rantalainen@jyu.fi

37 32 outi.teittinen@jamk.fi

38 33 riku.p.nikander@jyu.fi

39 34  
40 35  
41 36 **Corresponding author:**

42 37 Johanna Edgren

43 38 Faculty of Sport and Health Sciences/Gerontology Research Center

44 39 PL 35 (Viv)

45 40 40014 University of Jyväskylä

46 41 Finland

47 42 E-mail: johanna.edgren@jyu.fi

48 43 Tel: +358-40-8053869

49 44  
50 45 **Word count:** 5132

51 46 **Keywords:** counselling, falls, life-space mobility, older people, physical activity

52 47 **Issue date:** 5.6.2019

53 48 **Protocol version:** revision (02)

## 1 ABSTRACT

2 **Introduction:** The most promising way to promote active life years in old age is to promote  
3 regular participation in physical activity (PA). Maintaining lower extremity muscle function with  
4 good balance has been associated with fewer falls and the need of help from others. This article  
5 describes the design and intervention of a randomized controlled trial (RCT) investigating the  
6 effectiveness of a health and PA counselling program on life-space mobility and falls rates in  
7 community-dwelling older adults at the Health Kiosk and/or Service Centre.

8 **Methods and analysis:** Community-dwelling men and women (n=450) aged 65 years and over  
9 with early phase mobility limitation will be recruited to a 24-month RCT with a 24-month  
10 follow-up. Participants will be randomly allocated into either a health and PA counselling group  
11 (intervention) or relaxation group (control intervention). All participants will receive five group  
12 specific face-to-face counselling sessions and 11 phone calls. The counselling intervention will  
13 include individualized health counselling, strength and balance training and guidance to regular  
14 PA. The control group will receive relaxation exercises. Outcomes will be assessed at baseline,  
15 12, 24, and 48 months. Primary outcomes are average life-space mobility score and falls rates.  
16 Life-space mobility will be assessed by a validated questionnaire. Falls rates will be recorded  
17 from fall diaries. Secondary outcomes are data on fall-induced injuries and living-arrangements,  
18 number of fallers, fracture risk, mean level of PA, physical performance, quality of life, mood,  
19 cognition, balance confidence, and fear of falling. Data will be analyzed using the intention-to-  
20 treat principle. Cost-effectiveness of the program will be analyzed. Ancillary analyses are  
21 planned in participants with greater adherence.

22 **Ethics and dissemination:** Ethical approval was obtained from the Ethics Committee of the  
23 Tampere University Hospital (R15160). Outcomes will be disseminated through publication in  
24 peer-reviewed journals and presentations at international conferences.

25 **Trial registration:** Prospectively registered to ISRCTN (ISRCTN65406039).

26

27

## 1 STRENGTHS AND LIMITATIONS OF THE STUDY

- 2 - This randomized controlled trial will investigate the effectiveness of a pragmatic home-  
3 based exercise program on life-space mobility and falls rates.
- 4 - The counselling protocol is delivered by nurses and physiotherapists according to current  
5 evidence-based principles to maximize long-term exercise adherence and commitment to  
6 physical activity, and to prevent falls.
- 7 - Counselling sessions take place at easily accessible community-based Health Kiosk  
8 and/or Service Centre environment.
- 9 - This will be the first randomized controlled trial to evaluate the effectiveness of health  
10 and physical activity counselling in a community-based environment to improve life-  
11 space mobility and prevent falls.
- 12 - Research nurses and research physiotherapists are not blinded to the random allocation.

## 1 INTRODUCTION

2 The disablement process model by Verbrugge and Jette,[1] describes the path from pathology to  
3 disability via impairments and functional limitations. Accordingly, multiple health conditions  
4 (e.g. osteoarthritis) may lead to physical impairments (e.g. weak leg extensor muscles), which  
5 may result in functional limitations (e.g. challenges with lower extremity function and balance).  
6 Functional limitations may finally lead to disability resulting in uncertainty to walk safely, an  
7 increased fear of falling and rate of falls, all of which can further reduce movement within a  
8 typical living area,[2, 3]. In addition, restricted life-space mobility can reduce participation in  
9 social activities, which can lead to little utilization of community amenities available. This  
10 vicious cycle can escalate as overall health and well-being of older adults deteriorates.

11 Developing and implementing effective strategies that prevent disability and falls among older  
12 people is an urgent public health issue given our ageing population and the personal and societal  
13 impact from falls. Targeted exercise programs including muscle strength and balance training,  
14 such as the Otago Exercise Program, have been found to be effective at preventing falls and  
15 injurious falls among community-dwelling older adults,[4-6]. There is also evidence that older  
16 people with multiple risk factors for falls and thus at high risk of falling benefit from a  
17 multifactorial approach,[4]. For instance, a previous multifactorial trial (Chaos Falls Clinic),  
18 which included an individualized 12-month falls prevention programme, in high-risk individuals  
19 aged 70 years or over reduced falls and fall-induced injuries by over 25%,[7]. Despite its  
20 effectiveness, multifactorial interventions can be expensive and labour-intensive.

21 Community-based and easily accessible service platforms and concepts provide an opportunity  
22 potential for health and physical activity counselling since they may reach a broad range of older  
23 people who already wish to change their lifestyle. As an approach to reform the social and health  
24 care system in Finland and confront European megatrends such as the aging population with  
25 increasing public costs, community-based Health Kiosks and Service Centres have been launched  
26 to enable rapid health screening and counselling to support people to be active and participative  
27 in the society. Their focus is on health promotion and disability prevention. Scheduled  
28 appointments are not required and they are free of charge. A rapid health screening with tailored  
29 counselling and guidance at an easily accessible environment can offer a modernized primary  
30 care concept to tackle or slow down progressive but early phase health issues and disablement  
31 processes. It may also provide a unique opportunity to increase physical activity, support physical  
32 function, and avoid falls, depressive symptoms and social isolation,[8, 9].

1 To our knowledge, only one previous randomized controlled trial has shown the impact of a  
2 multifactorial intervention on life-space mobility in older people,[10]. It has been recommended  
3 that future studies should measure mobility at both the participation and activity levels.  
4 Additionally, it has been suggested that future research should include a longer follow-up period  
5 to determine if the benefits of any interventions are maintained long-term (> 12 months).  
6 Therefore, COSMOS will be the first randomized controlled trial to evaluate the effectiveness of  
7 24-month health and physical activity counselling program in a community-based Health Kiosk  
8 and/or Service Centre environment to improve life-space mobility and physical activity and  
9 prevent falls, and evaluate whether any benefits are sustained after a 24-month follow-up.  
10 Another novel aspect is that this study will assess simultaneously changes in the ratio of falls  
11 rates and the difference in rate changes in the life-space mobility outcome.

## 13 TRIAL OBJECTIVES AND HYPOTHESIS

14 The primary aim of this randomized controlled trial (RCT) named “Counselling for physical  
15 activity, life-space mobility and falls prevention in old age” (COSMOS) is to examine the  
16 effectiveness of a 24-month community-based health and physical activity counselling program in  
17 increasing life-space mobility and reducing the rate of falls in community-dwelling elderly people.

18 Secondary aims of the study are to evaluate the effects of the counselling intervention on data on  
19 fall-induced injuries and living-arrangements, number of fallers, fracture risk, mean level of  
20 physical activity, physical performance, quality of life, mood, cognition, and balance confidence.  
21 We will also evaluate the cost-effectiveness of the counselling program within the community-  
22 based environment for falls and whether any of the aforementioned potential benefits can be  
23 maintained two years after the end of 24-month intervention.

24 We hypothesise that 1) life-space mobility can increase and 2) fall rates can reduce via improved  
25 lower extremity ability, balance and mobility. These together enable increasing walking distances  
26 and thus support safe attendance to physical and social activities outside one’s own neighbourhood  
27 or home district.

## 1           2           3           4           5           6           7           8           9           10           11           12           13           14           15           16           17           18           19           20           21           22           23           24           25           26           27           28           29           30           31           32           33           34           35           36           37           38           39           40           41           42           43           44           45           46           47           48           49           50           51           52           53           54           55           56           57           58           59           60

## 1   **METHODS AND DESIGN**

2   This protocol article is written based on the SPIRIT reporting guidelines,[11] and the trial  
3   protocol was prospectively registered to ISRCTN (ISRCTN65406039). The experimental design  
4   is illustrated in *Figure 1*.

### 6   **Trial design and study setting**

7   COSMOS is a pragmatic single-blinded 24-month RCT with a 24-month follow-up at a  
8   community-based environment. Participants will be randomized into one of two groups: 1) a  
9   health and physical activity counselling intervention or 2) a relaxation intervention (control). All  
10   participants will be assessed at baseline and after 12- and 24-months. Additionally, there will be  
11   follow-up assessments at 48-months. All assessments will begin with a structured interview and  
12   health examination performed by a research nurse and followed by physical performance tests  
13   carried out by a research physiotherapist. All assessments and intervention sessions will take  
14   place at the Health Kiosk of Ylöjärvi or at the Service Centre of Ylöjärvi, Finland. Health Kiosk  
15   is a nurse-led pilot primary care service environment situated in a shopping center,[8, 9]. Service  
16   Centre is a modern meeting place for senior citizens with various indoor and outdoor activities.  
17   Ylöjärvi is a municipality of 32 000 inhabitants including suburban and rural areas. Study  
18   participants can choose themselves the place they would prefer to visit.

### 20   **Participant eligibility**

21   The target number of participants is 450 who will be randomly allocated to each group (n=225  
22   each). Both men and women will be recruited. Participant *inclusion criteria* are as follows: 1)  
23   aged 65 years or over, 2) community-living people, 3) living in Pirkanmaa District, Finland, and  
24   4) at least minor self-reported mobility difficulty.

25   *Mobility difficulty* will be assessed by using a structured and validated interview asking each  
26   participant about his or her ability to walk 2.0 km, walk 0.5 km, and climb up one flight of  
27   stairs,[12]. The questions are formulated as follows: “Do you have difficulty in ...” with five  
28   alternative response options provided: 1) ...able to manage without difficulty, 2) ...able to  
29   manage with some difficulty, 3) ...able to manage with great deal of difficulty, 4) ...able to  
30   manage only with help of another person, and 5) ...unable to manage even with help. To identify

1 persons with minor mobility difficulty, additional questions are posed to participants who do not  
2 report task difficulty with any of the above questions. The questions concern the modification of  
3 task performance and the alternatives given are: resting in the middle of the performance, using  
4 an aid, taking support from handrails, having reduced the frequency of performing the task,  
5 having slowed down performance of the task, experiencing tiredness when performing the task,  
6 or some other change in carrying out the task. *Minor mobility difficulty* is considered if  
7 participant reports task modification in one or more of the tasks listed above.

8 Participant *exclusion criteria* are following: 1) severe functional limitations (unable to walk 500  
9 meters unaided), 2) severe cardiovascular or pulmonary disease, 3) severe progressive disease, 4)  
10 terminally ill (predicted life expectancy <12 months), 5) memory impairment (MMSE score 21  
11 points or less),[13], 6) living in an institution, 7) unwilling to be randomized, or 8) alcoholism  
12 (AUDIT score  $\geq 15$ ),[14]. Severe cardiovascular and severe pulmonary disease is defined as,  
13 conditions which are currently either unstable or contraindications for physical exercise and/or  
14 need immediate medical attention. Severe progressive disease is defined as, conditions such as  
15 neoplasm and amyotrophic lateral sclerosis (ALS), which have poor prognosis and presumably  
16 poor response or no response to physical exercise.

## 18 **Recruitment**

19 We will recruit eligible men and women during their Health-Kiosk and Service Centre visits as  
20 well as via newspaper advertisements, notice boards, community centers, and at senior events.  
21 All participants will be initially screened for eligibility over the telephone (age, living  
22 arrangements, and place of residence) where they will have the opportunity to ask questions and  
23 have an informed discussion with research staff. Following the telephone screening, those who  
24 are eligible and are willing to participate, will receive an information letter, consent forms and  
25 reply-paid envelope. Upon receiving a signed informed consent form, a member of the research  
26 team will sign each form prior to the baseline assessments. Potential participants will be invited  
27 to the baseline assessments, where a trained research nurse confirms their eligibility with a  
28 structured interview and health examination.

## 1 **Random allocation**

2 Participants will be randomly allocated into either 1) the health and physical activity counselling  
3 intervention or 2) the relaxation intervention (control group). A computer generated  
4 randomization protocol will be created by a statistician who is not part of the research team.  
5 Random allocation will be stratified by sex, age (65-79 years/80 years or older) and presence or  
6 absence of falls during the last 24 months. Block size of 6, 8, 10 or 12 will be randomly varied to  
7 ensure the equality of group sizes (allocation ratio 1:1). Allocation results will be stored in sealed  
8 envelopes and stored in locked cabin. After the baseline measurements, a researcher will open  
9 one envelope according to each participant's sex, age and previous falls, and then verify with the  
10 research records, which intervention the participant is allocated. Participants are informed  
11 whether they belong to the health and physical activity counselling or relaxation group.  
12 Allocation concealment will be ensured, as the randomisation code will only be released at the  
13 completion of the study. Research nurses and physiotherapists are not blinded to the group  
14 allocation due to limited financial and personnel resources. The principal investigator will be  
15 blinded.

## 16 **Interventions**

17 The COSMOS study involves two interventions: 1) health and physical activity counselling, and  
18 2) a relaxation intervention (control group). *Supplementary figure* describes the participant  
19 timeline. Both interventions include five face-to-face sessions taking place at week one and one,  
20 three, six, and 12 months after the baseline measurements. During each face-to-face session, a  
21 physiotherapist will provide instructions for the next level of the program. Participants will be  
22 provided with 11 supportive telephone calls by a physiotherapist, regardless of the intervention,  
23 which will be delivered at two, four, five, seven, eight, nine, ten, 11, 16, 20 and 23 months after  
24 baseline. The total duration of the interventions is 24 months. At the end of the first face-to-face  
25 session, the physiotherapist informs the participant on how to fill out the physical activity and  
26 falls diary.

### 27 ***Health and physical activity counselling intervention***

28 Participants randomized to the health and physical activity counselling intervention will receive  
29 five individually tailored 1.5-hour face-to-face sessions containing a 30-minute health  
30



1 counselling session by a trained research nurse together with a 60-minute physical activity  
2 counselling session delivered by an experienced research physiotherapist.

3 *The health counselling* follows the motivational interviewing concept,[15] based on the Social  
4 Cognitive Theory,[16] and the trans-theoretical model,[17]. The structure of the health  
5 counselling is based on the guidelines of the IKINÄ-manual, which is a guide for preventing falls  
6 and harm from falls in older people, released by the Finnish National Institute for Health and  
7 Welfare,[18]. Accordingly, during health counselling sessions the nurse will advise participants  
8 on safety issues related to their home-environment, such as providing recommendations to use  
9 anti-slippery shoe devices during winter, and participating in regular physical activity.  
10 Additionally, participants in the health and physical activity counselling intervention will receive  
11 handouts on how to avoid fall accidents in the home environment and outdoors. Moreover, health  
12 counselling sessions will include counselling on a healthy diet and recommendations to reduce  
13 alcohol consumption and smoking based on discussions with each participant about her/his  
14 background and habits, and motivation to change,[15]. The nurse will also discuss topical and  
15 relevant health related issues with health and physical activity counselling intervention members  
16 i.e. managing blood pressure, medication, and depressive mood.

17 *The physical activity counselling* is based on the modified version of the Otago Exercise Program  
18 (OEP, available online),[19]. The OEP is an innovative model of low frequency physical activity  
19 counselling and exercise training tailored for older people and typically delivered by a  
20 physiotherapist at older people's home. It contains four levels (A, B, C, and D) which all contain  
21 strengthening exercises for lower extremity muscles as well as balance, walking and stair  
22 climbing exercises and active range of movement exercises (e.g. neck rotations and hip and knee  
23 extensions). The exercises on each level take about 30 minutes to complete. Participants are  
24 expected to exercise three times a week at home and go for a walk at least twice a week for 30  
25 minutes. Walking exercise can also be broken into smaller periods e.g. three ten-minute bouts.

26 The physiotherapist may modify and apply the OEP individually based on health, motivational  
27 status, and participant goals. The participants will receive progressive illustrated instructions and  
28 will be provided with ankle weights (0.5–5.0 kg) for the first 12 months. Thereafter, therapist will  
29 encourage participants to attend a local gym or be involved with other community exercise  
30 facilities. For this study, two additional training levels (COSMOS 1 and COSMOS 2, illustrated  
31 in **Table 1**) have been developed to ensure progression throughout the 24-month intervention.

1 During the physical activity counselling sessions, a physiotherapist will also discuss the  
 2 importance of regular and diverse physical activity and presents the Physical Activity Pie for  
 3 Older Adults (Finnish recommendations for physical activity among 65 years old and older)  
 4 ([http://www.ukkinstituutti.fi/filebank/64-physical\\_activity\\_pie.pdf](http://www.ukkinstituutti.fi/filebank/64-physical_activity_pie.pdf)). In addition, therapist will  
 5 provide an exercise referral to a local community exercise facilities based on the earlier  
 6 discussions with the participant about her/his background and motivation to exercise. When  
 7 participant receives a referral to a community-based exercise program, the physiotherapist will  
 8 instruct him/her to replace one of the weekly Otago, COSMOS or walking exercises with  
 9 corresponding exercise. For instance, participant may replace the Otago strength exercise with  
 10 gym training or by attending a strength-training group. Correspondingly, participant may replace  
 11 Otago balance exercise with yoga, Pilates, Tai Chi, or other guided balance exercise. Walking  
 12 exercises can also be replaced e.g. with swimming or other aerobic exercise format.

14 **Table 1.** Content of the COSMOS 1 and 2 levels

|                                | <b>COSMOS 1</b>                                                                                                                                                                                                                                                                           | <b>COSMOS 2</b>                                                                                                                               |
|--------------------------------|-------------------------------------------------------------------------------------------------------------------------------------------------------------------------------------------------------------------------------------------------------------------------------------------|-----------------------------------------------------------------------------------------------------------------------------------------------|
| <b>Warm-up</b>                 | Same as in the Otago Exercise Program                                                                                                                                                                                                                                                     | Same as in the Otago Exercise Program                                                                                                         |
| <b>Strengthening exercises</b> | <ul style="list-style-type: none"> <li>• One legged squat</li> <li>• One legged sit to stand</li> <li>• Sideways squats</li> <li>• Jumping exercises</li> </ul>                                                                                                                           | Same strengthening exercises as in the COSMOS 1<br>→ Repetitions and series are updated and jumping exercises are extended and more demanding |
| <b>Balance exercises</b>       | <ul style="list-style-type: none"> <li>• Same as in the D level of the Otago Exercise Program but stair climbing is replaced with squats</li> <li>• Additionally, multitasking is incorporated into all exercises (e.g., participants count repetitions or seconds backwards).</li> </ul> | Same balance exercises as in the COSMOS 1 level but all exercises are performed with eyes closed                                              |

16 ***Relaxation intervention (control group)***

17 Participants randomized to the relaxation intervention will receive five 45-minute face-to-face  
 18 sessions of structured relaxation exercises instructed by a physiotherapist. We believe that  
 19 offering relaxation exercises will motivate the control participants to continue in the study  
 20 without increasing their physical activity. The relaxation program will be updated during each  
 21 face-to-face session and will proceed as follows: 1) learning the diaphragmatic respiration  
 22 technique, 2) learning the tension-relaxation technique, 3) utilizing tension-relaxation technique,

1  
2  
3 1 4) utilizing techniques learned in previous exercises to whole body relaxation, and 5) learning  
4 2 consciousness of the body sensations. All exercises will be displayed on a compact disc (CD) or  
5 3 via mp3-format. Additionally, written instructions will be available. During the first face-to-face  
6 4 session, participants will receive the same handouts as the health and physical activity  
7 5 counselling intervention members on how to avoid fall accidents in the home environment and  
8 6 outdoors.

### 7 ***Supportive telephone calls***

8 During 11 supportive telephone calls, the physiotherapist will enquire about how exercise  
9 (physical activity or relaxing program) is progressing, has the participant fallen and ensure that  
10 the most recent fall and exercise diary is returned. Additionally, therapists will confirm or  
11 schedule the next face-to-face session or 12- and 24-month follow-up measurements when  
12 appropriate. If a participant has fallen, therapists will confirm the circumstances and consequence  
13 related to the fall/falls. For those in the health and physical activity counselling group, the  
14 therapist will also discuss if there is a need to update the program, i.e. revise the number of  
15 repetitions and/or series or change the magnitude of the ankle weight before the next face-to-face  
16 session. In addition, any barriers to exercise that have come up from the participants will be  
17 addressed.

### 18 19 **Outcomes**

20 Assessments will include a comprehensive battery of tests and questionnaires on mobility,  
21 physical activity, physical function and health. The baseline assessment will take about 2 h to  
22 complete whereas 12-month and 24-month assessments will take about 1.5 h. The order of the  
23 assessments and measurements is standardized at each time point. **Table 2** presents the outcome  
24 and other variables, methods and schedule of the assessments in the study.

### 25 ***Primary outcomes***

26 Daily filled and monthly returned fall diaries will be used to gather information on the *falls rates*  
27 during the 24-month intervention and follow-up. A fall is defined as an unexpected event in  
28 which participant comes to rest on the ground, floor or other lower level [20]. A research  
29 physiotherapist will phone monthly all those participants who have reported a fall or falls or if a  
30 diary is not returned.

**Table 2.** Outcome and other variables, methods and schedule of the assessments

| <b>Continuous monitoring</b>                                                                                                                                                          | <b>BL</b> | <b>12-month</b> | <b>24-month</b> | <b>48-month</b> | <b>O</b> |
|---------------------------------------------------------------------------------------------------------------------------------------------------------------------------------------|-----------|-----------------|-----------------|-----------------|----------|
| <b>Falls rates</b>                                                                                                                                                                    |           |                 |                 |                 | <b>P</b> |
| Daily filled and monthly returned diaries                                                                                                                                             | N         | Y               | Y               | Y               |          |
| Number of fallers i.e. a fall indicator variable (yes/no)                                                                                                                             |           |                 |                 |                 | S        |
| Daily filled and monthly returned diaries                                                                                                                                             | N         | Y               | Y               | Y               |          |
| <b>Fall-induced injuries</b>                                                                                                                                                          |           |                 |                 |                 | S        |
| Daily filled and monthly returned diaries and telephone interviews                                                                                                                    | N         | Y               | Y               | N               |          |
| Hospital registers are used to verify severe injuries                                                                                                                                 | N         | Y               | Y               | Y               |          |
| <b>Health service use</b>                                                                                                                                                             |           |                 |                 |                 |          |
| Hospital registers are used to verify severe injuries                                                                                                                                 | N         | Y               | Y               | Y               |          |
| <b>Adverse events due to interventions</b>                                                                                                                                            |           |                 |                 |                 |          |
| Daily filled and monthly returned diaries and telephone interviews                                                                                                                    | N         | Y               | Y               | N               |          |
| <b>Participant adherence to the interventions</b>                                                                                                                                     |           |                 |                 |                 |          |
| Average number and duration of exercise sessions and total number and duration of exercise sessions based on daily filled and monthly returned physical activity and exercise diaries | N         | Y               | Y               | N               |          |
| <b>Perceived exertion of interventions</b>                                                                                                                                            |           |                 |                 |                 |          |
| Modified Borg scale (range 0-10)                                                                                                                                                      | N         | Y               | Y               | N               |          |
| <b>Physical, cognitive and social assessments</b>                                                                                                                                     | <b>BL</b> | <b>12-month</b> | <b>24-month</b> | <b>48-month</b> |          |
| <b>Physical activity</b>                                                                                                                                                              |           |                 |                 |                 | S        |
| Hookie AM 20 triaxial accelerometer for 7 days                                                                                                                                        | Y         | Y               | Y               | N               |          |
| Daily filled and monthly returned physical activity and exercise diaries                                                                                                              | N         | Y               | Y               | N               |          |
| Validated questionnaire (Scale of Grimby)                                                                                                                                             | Y         | Y               | Y               | Y               |          |
| <b>Physical performance</b>                                                                                                                                                           |           |                 |                 |                 | S        |
| Timed Up and Go-test (TUG)                                                                                                                                                            | Y         | Y               | Y               | N               |          |
| Short Physical Performance Battery (SPPB)                                                                                                                                             | Y         | Y               | Y               | N               |          |
| Jamar hand dynamometer                                                                                                                                                                | Y         | Y               | Y               | N               |          |
| <b>Body composition</b>                                                                                                                                                               |           |                 |                 |                 |          |
| Height and weight are measured and BMI is calculated                                                                                                                                  | Y         | Y               | Y               | Y               |          |
| <b>Fracture risk</b>                                                                                                                                                                  |           |                 |                 |                 | S        |
| World Health Organization Fracture Risk Assessment Tool (FRAX)                                                                                                                        | Y         | Y               | Y               | Y               |          |
| <b>Cardiovascular condition</b>                                                                                                                                                       |           |                 |                 |                 |          |
| New York Heart Association functional class (NYHA)                                                                                                                                    | Y         | Y               | Y               | Y               |          |
| Orthostatic test                                                                                                                                                                      | Y         | Y               | Y               | N               |          |
| <b>Self-reported physical ability</b>                                                                                                                                                 |           |                 |                 |                 |          |
| Determined by asking                                                                                                                                                                  | Y         | Y               | Y               | Y               |          |
| <b>Mobility difficulty</b>                                                                                                                                                            |           |                 |                 |                 |          |
| Structured interview                                                                                                                                                                  | Y         | Y               | Y               | Y               |          |
| <b>Need of mobility assistive devices</b>                                                                                                                                             |           |                 |                 |                 |          |
| Determined by asking                                                                                                                                                                  | Y         | Y               | Y               | Y               |          |
| <b>Living arrangements</b>                                                                                                                                                            |           |                 |                 |                 | S        |
| Determined by asking                                                                                                                                                                  | Y         | Y               | Y               | Y               |          |
| <b>Questionnaire-based assessments</b>                                                                                                                                                | <b>BL</b> | <b>12-month</b> | <b>24-month</b> | <b>48-month</b> |          |
| <b>Life space mobility</b>                                                                                                                                                            |           |                 |                 |                 | <b>P</b> |
| Life-space mobility assessment (LSA)                                                                                                                                                  | Y         | Y               | Y               | Y               |          |
| <b>Balance confidence</b>                                                                                                                                                             |           |                 |                 |                 | S        |
| Activities-specific Balance Confidence scale (ABC)                                                                                                                                    | Y         | Y               | Y               | Y               |          |
| <b>Fear of falling</b>                                                                                                                                                                |           |                 |                 |                 | S        |
| Determined by asking and by Visual Analogue Scale (VAS)                                                                                                                               | Y         | Y               | Y               | Y               |          |
| <b>Quality of life (QOL)</b>                                                                                                                                                          |           |                 |                 |                 | S        |
| World Health Organization Quality of Life (WHOQOL) questionnaire                                                                                                                      | Y         | Y               | Y               | Y               |          |
| <b>Cognitive status</b>                                                                                                                                                               |           |                 |                 |                 | S        |
| Mini-Mental State Examination (MMSE)                                                                                                                                                  | Y         | Y               | Y               | Y               |          |
| <b>Depressive mood</b>                                                                                                                                                                |           |                 |                 |                 | S        |
| Geriatric Depression Scale (GDS-15)                                                                                                                                                   | Y         | Y               | Y               | Y               |          |
| <b>Alcohol consumption</b>                                                                                                                                                            |           |                 |                 |                 |          |
| The Alcohol Use Disorders Identification Test (AUDIT)                                                                                                                                 | Y         | Y               | Y               | Y               |          |

BL=baseline, O=outcome, N=no, Y=yes, P=primary, S=secondary

1 *Life-space mobility Assessment (LSA)* is determined from a validated questionnaire, which  
2 measures the size of the area that a person has moved around in during the 4 weeks preceding the  
3 assessment,[2]. It correlates with observed physical performance and self-reported function,[2].  
4 For each level of life-space (bedroom, other rooms, outside home, neighbourhood, town, beyond  
5 town) persons are asked how many days within a week they attained that level of life-space and  
6 whether they need help from another person or from assistive devices. A composite measure of  
7 life-space combines the components of life-space level attained, degree of independence, and  
8 frequency of attainment,[3].

### 9 ***Secondary outcomes***

10 A number of secondary outcome measures will be assessed to clarify potential mechanism  
11 underlying any reduction in fall rates or increased life-space mobility during the trial, and to  
12 determine to what extent the training transfers to other important outcomes.

13 *Physical activity:* The Finnish Hookie AM 20 triaxial accelerometer will be used to measure all  
14 physical activity over a 7-day period. The Hookie AM 20 device and related data analyses is  
15 based on the UKK Institute's algorithms which has been used in three large Finnish population-  
16 based cohort studies,[21, 22] and in older community dwelling individuals,[23]. A physical  
17 activity and exercise diary will also be used during the first 24 months' period of the study. Self-  
18 reported physical activity will also be quantified using a modified version of the scale by  
19 Grimby,[24, 25].

20 *Physical performance:* An experienced research physiotherapist will conduct all physical  
21 performance tests, including the Timed Up and Go-test (TUG),[26] and Short Physical  
22 Performance Battery (SPPB),[27]. Handgrip strength from the dominant arm will be assessed  
23 using the Jamar hand dynamometer,[28].

24 *A fall indicator variable* (yes/no) will be formed. Additionally, *fall-induced injuries* will be  
25 assessed based on diaries filled daily and returned each month until 24-months after the baseline.  
26 Hospital registers will also be used to verify severe injuries (i.e. fractures and head injuries)  
27 during the intervention and follow-up. Injuries will be categorized as follows: 1) soft tissue  
28 bruises and contusions, 2) wounds and lacerations, 3) bone fractures, 4) joint distortions and  
29 dislocations, 5) head injuries other than fractures, and 6) other injuries. Additionally, all injuries  
30 will be categorized based on medical contact and/or treatment.

1  
2  
3 1 *Health-related quality of life* will be assessed using the World Health Organization Quality of  
4 Life (WHOQOL) 26-item short version questionnaire, which includes questions related to  
5 2 Life (WHOQOL) 26-item short version questionnaire, which includes questions related to  
6 3 physical health, psychological health, social relationships and environment,[29]. *Living-*  
7 4 *arrangements* will be determined by interview. *Fracture risk* will be assessed by WHO Fracture  
8 5 Risk Assessment Tool (FRAX) via interview. The FRAX algorithms give the 10-year probability  
9 6 of hip fracture and a major osteoporotic fracture (clinical spine, forearm, hip or shoulder  
10 7 fracture),[30].

11 8 *Depressive mood* will be assessed using the Geriatric Depression Scale (GDS-15),[31].  
12 9 Participants who achieve 6 points or more on GDS-15 test will be referred to their physician for  
13 10 follow up. *Cognitive status* will be assessed via the Mini-Mental State Examination  
14 11 (MMSE),[13]. Participants who score 21 points or less in MMSE are excluded and referred to a  
15 12 physician appointment.

16 13 *Balance confidence* will be evaluated using the Activities-specific Balance Confidence scale  
17 14 (ABC),[32]. *Fear of falling* will be assessed (yes/no) and measured by the Visual Analogue  
18 15 Scale (VAS),[33]. A 100-mm long line will be used with the left end of the line (0 mm)  
19 16 representing “no fear” and the right end (100 mm) “extreme fear”.

### 17 ***Other variables***

18 18 During the health examination, the research nurse will measure height and weight using standard  
19 19 procedures. Body mass index will be calculated as body weight (kg)/height (m) squared. The  
20 20 research nurse will also ask about any chronic and geriatric conditions, prescription  
21 21 medication(s) and the presence of any *cardiovascular condition* using New York Heart  
22 22 Association functional class (NYHA),[34] and perform an orthostatic test,[35]. *Alcohol*  
23 23 *consumption* will be assessed by the AUDIT-C tool and additionally by AUDIT if the AUDIT-C  
24 24 score is 6 or more among men and 5 or more among women,[14]. If the AUDIT score is 15 or  
25 25 more, participants will be excluded and referred to a health care practitioner.

26 26 *Self-reported physical ability* will be determined via interview and asking participants: “How  
27 27 would you describe your physical ability?” Options are: 1) excellent, 2) good, 3) average, and 4)  
28 28 poor. *Need of mobility assistive devices* will also be determined via interview. *Mobility difficulty*  
29 29 will be assessed using a structured interview described earlier (see participant eligibility). As an  
30 30 outcome measure of *adherence*, we utilize the average number and duration of exercise sessions  
31 31 and total number and duration of exercise sessions based on daily completed and monthly

1 returned physical activity and exercise diaries. In addition, *perceived exertion* will be assessed  
2 using the modified Borg Rating of Perceived Exertion (RPE) scale (range 0-10),[36].

3 *Demographics* include age, sex, marital status, education, and most recent occupation, as well as  
4 diet, use of spectacles, and smoking habits and whether participants have any problems related to  
5 vision and hearing, will be determined by interview. *Previous falls* will also be asked at baseline:  
6 “Have you fallen (and if so, how many times) during the previous year/6 months/month (without  
7 substantial external force) and did you injure yourself? *Adverse events* due to interventions are  
8 assessed by daily completed and monthly returned diaries and telephone interviews.

## 10 **Statistical methods**

### 11 ***Pretrial power calculations***

12 We estimated the minimum required sample size in a simulation model including the continuous  
13 and count outcomes and the mutual correlation estimated via normally distributed random  
14 effects. Sample size estimation accounted for the multiple testing and the correlation between  
15 outcomes,[37]. Based on previous research,[7], we assumed that the control group would have a  
16 fall incidence of 131 per 100 person-years and the corresponding rate in the intervention group  
17 would be 118 per 100 person-years, which corresponds to a modest relative risk reduction of  
18 about 10% in favor of the intervention group. To allow some over-dispersion in the fall count,  
19 the normally distributed random effect variance was set at 0.3. Based on data from the Life-  
20 Space Mobility in Old Age (LISPE) study,[38], we set the mean at 64.0 (SD = 20.6) for the life-  
21 space mobility score, which was increased to 70.4 in the intervention group during the follow-up  
22 representing a relative increase of 10%. To obtain a conservative sample size estimate the  
23 random effect correlation was set at the low value 0.10. The simulation studies were based on  
24 1000 replications of the model parameters. To find the likelihood ratio test statistic significant at  
25 5% significance level for the above mean difference and risk ratio simultaneously, power of 80%  
26 was reached with a sample size of 346 based on equal allocation of subjects into the control and  
27 intervention groups. To account for 30% attrition, the sample size was increased to 450 (225 in  
28 each group). In previous intervention studies including similar components, dropout rates have  
29 been approximately 15 % (Palvanen et al. 2014). We hypothesized the attrition rate to be even  
30 greater, because for majority of the participants, participation involved travelling across  
31 Pirkanmaa District (distances were even 100 km in each direction), and travelling costs were not  
32 covered and transportation was not arranged by COSMOS.

## 1 ***Statistical analyses***

2 All statistical analyses will be conducted using the Mplus software and IBM SPSS software  
3 package version 24 (IBM Corp, Armonk, New York). We will analyze the data on an intention-  
4 to-treat basis, using the data from all randomized participants despite the protocol adherence and  
5 independent of the sponsor and competing interest. Follow-up time for falls, fallers and fall-  
6 induced injuries including fractures will be calculated from the day when participant started the  
7 intervention to the end of the 24-month intervention + 24-month follow-up or withdrawal from  
8 study.

9 The *primary outcome analysis* is a likelihood ratio test assessing simultaneously changes in the  
10 ratio of falls rates and the difference in rate changes in the LSA outcome. The test is based on a  
11 model of the fall outcome in a negative binomial regression model, where a random effect is  
12 used to account for likely over dispersion in the fall count distribution and the intraclass  
13 correlation of the measurement time points. Descriptive information is calculated as incidence  
14 rates of falls, fallers, multiple fallers and fall-induced injuries (including fractures) per 100  
15 person-years. Proportion of fallers between groups will be reported using incidence rate ratio  
16 statistics.

17 *Ancillary analysis* using causal modelling will be conducted to establish intervention effects in  
18 people with greater adherence (per protocol analysis). Covariance analysis will be used to  
19 analyze between group-differences in other continuous variables and general linear models will  
20 be utilized to assess the effect of group allocation on continuous secondary outcome measures.  
21 Logistic regression models will be used to compare the two intervention groups on dichotomous  
22 outcome measures. *The explanatory factors of exercise adherence* will be investigated in a  
23 longitudinal path model enabling the linking data from individual characteristics to intervention  
24 effectiveness. Directed acyclic graphs are used to establish theoretical model relationships that  
25 serve as basis for model development with observed data. Additionally, we model physical  
26 activity trajectories and investigate individual variability among the trajectories.

27 *Economic analyses* will be approached from the perspective of the community health care  
28 provider. The health outcome measure will be cost per fall prevented over the study duration.  
29 Costs will include intervention costs as well as fall-induced health care and community service  
30 costs. Cost-utility is based on quality-adjusted life years (QALY) gained, where quality is  
31 measured at 12, 24 and 48 months with the WHO quality of life (WHOQoL) index. Using mean  
32 costs and QoL in each treatment arm, the intervention cost effectiveness will be assessed by



1  
2  
3 1 comparing the intervention incremental cost per a prevented fall and incremental cost per QALY  
4 gained to those in the control group. The probability that the intervention is cost effective will be  
5 2 computed based on bootstrapping the incremental cost-effectiveness ratio as described in,[39].  
6 3  
7 4 Cost-effectiveness acceptability curves will be plotted for various levels of willingness to pay.  
8  
9

10  
11 5 Where missing data is generated through the missing-at-random (MAR) mechanism, we will  
12 6 employ the standard MAR-based likelihood specification in Mplus,[40]. A custom missing data  
13 7 model will be used when missing data is generated by a non-random mechanism.  
14  
15  
16  
17 8

## 9 **DATA MANAGEMENT**

10  
11 10 Once a participant has been randomly allocated, every effort will be made to follow-up the  
12 11 participant on outcome measures until the end of the study period. Any participants who  
13 12 discontinue or deviate from the intervention protocols or fail to complete the exercise and falls  
14 13 diary will still be invited to complete the 12 and/or 24 follow-up measurements. Participant data  
15 14 are stored on a secure database in accordance with the General Data Protection Regulations  
16 15 (2018). All collected data will be coded with unique identification numbers and stored centrally  
17 16 on the secure database of the University of Jyväskylä, a password-protected computer or in a  
18 17 locked filing cabinet in a secure office space, only accessible by a limited number of people. The  
19 18 questionnaires and forms will be checked for completeness and congruity instantly when filled  
20 19 and/or received and again before data entry onto the database. Additionally, we will regularly  
21 20 check the data files for omissions and errors to ensure the data integrity. Trial documentation and  
22 21 data will be archived for at least 10 years after completion of the trial after which it will be  
23 22 destroyed. The data monitoring committee (DMC) consists of the research group members (see  
24 23 front page).  
25  
26  
27  
28  
29  
30  
31  
32  
33  
34  
35  
36  
37  
38  
39  
40  
41  
42  
43  
44  
45  
46  
47  
48  
49

## 50 **TRIAL MONITORING**

51  
52  
53 26 A standard operation procedure has been written before launching the study and will be followed  
54 27 carefully throughout the study. Regular meetings will be organized for monitoring the quality of  
55 28 data collection. Senior researchers will carefully educate the personnel performing the  
56 29 measurements and the same staff will engage in the data collection throughout the study.  
57  
58  
59  
60

## 1 **ETHICS AND DISSEMINATION**

2 The Ethics Committee of the Tampere University Hospital has approved the procedures and  
3 design of the trial (03/11/2015, ref: R15160). The COSMOS study is carried out according to the  
4 guidelines of good scientific practice (Declaration of Helsinki). Any protocol modifications will  
5 be reported to the Ethical Committee and to the trial registry (ISRCTN). Participants are insured  
6 for intervention related harms. Moreover, we will record any adverse events from either of the  
7 interventions and report serious adverse events to the ethics committee. Participants may  
8 withdraw from the study for any reason at any time.

9 The research team is committed to full disclosure of the results of the trial. Findings will be  
10 reported in accordance with the CONSORT guidelines in peer reviewed journals and  
11 international scientific conferences. The funder will have no role in the analysis or interpretation  
12 of the trial results. The study results will also be disseminated to the participants. Two  
13 information sessions will be organized to the study participants when the data of the primary  
14 outcomes has been analysed.

15 The research environment of the COSMOS trial is unique, because the trial is conducted at a  
16 Health Kiosk and/or a Service Centre, which are new easily accessible, free of charge  
17 counselling concepts, targeted and tailored for elderly people. This allows extending the study  
18 further to investigate the effectiveness of the counselling and exercise referral to promote actual  
19 mobility and to prevent fractures as a primary endpoint, which, according to our knowledge, has  
20 not been done before. If proven safe and effective in the population setting, the  
21 counselling/referral-concept could also be modified and extended to investigate other health  
22 hazards such as elderly people experiencing memory complaints or cognitive impairments and/or  
23 people having early depressive signs to meet their hazards early for effective prevention and/or  
24 treatment.

## 26 **PATIENT AND PUBLIC INVOLVEMENT STATEMENT**

27 We did not directly include patient and public involvement in this study, but we will develop the  
28 counselling program based on participant feedback.

## 1 ACKNOWLEDGMENTS

2 The authors would like to thank all the trial participants. We thank also the research  
3 physiotherapists: Elina Ahlstedt-Kivelä, Paju Becker, and Eerika Tiirikainen as well as the  
4 research nurses: Anneli Peltonen, Kirsi Perkkiö, Tiina Raittinen, Laura-Emilia Vainio, and Arja  
5 Ylä-Rakkola for their valuable contribution. Additionally, authors would like to thank physician  
6 Jaakko Valvanne for his feedback on the health examination concept and psychologist Päivi  
7 Lappalainen for introducing the motivational interviewing technique to the study personnel. We  
8 wish to thank statistician Markku Kauppinen, who created the random allocation protocol. We  
9 thank also Sirpa Ellala, Paula Pasanen-Aro, Maarit Pitkänen, Anne Santalahti, and Laura  
10 Tyyskänen at the administration of the City of Ylöjärvi for ongoing collaboration and the  
11 Academy of Finland for funding the study.

## 1 REFERENCES

- 1 Verbrugge LM, Jette AM. The disablement process, *Soc Sci Med* 1994;38:1-14.
- 2 Baker PS, Bodner EV, Allman RM. Measuring life-space mobility in community-dwelling older adults, *J Am Geriatr Soc* 2003;51:1610-4 [published Online First: Nov].
- 3 Peel C, Sawyer Baker P, Roth DL, et al. Assessing mobility in older adults: the UAB Study of Aging Life-Space Assessment, *Phys Ther* 2005;85:1008-119 [published Online First: Oct].
- 4 Gillespie LD, Robertson MC, Gillespie WJ, et al. Interventions for preventing falls in older people living in the community, *Cochrane Database Syst Rev* 2012:CD007146 doi:10.1002/14651858.CD007146.pub3 [published Online First: Sep 12,].
- 5 El-Khoury F, Cassou B, Charles M, et al. The effect of fall prevention exercise programmes on fall induced injuries in community dwelling older adults: systematic review and meta-analysis of randomised controlled trials, *BMJ* 2013;347:f6234 [published Online First: Oct 29,].
- 6 Guirguis-Blake JM, Michael YL, Perdue LA, et al. Interventions to Prevent Falls in Older Adults: Updated Evidence Report and Systematic Review for the US Preventive Services Task Force, *JAMA* 2018;319:1705-16 doi:10.1001/jama.2017.21962 [published Online First: 04 24,].
- 7 Palvanen M, Kannus P, Piirtola M, et al. Effectiveness of the Chaos Falls Clinic in preventing falls and injuries of home-dwelling older adults: a randomised controlled trial, *Injury* 2014;45:265-71 doi:10.1016/j.injury.2013.03.010 [published Online First: Jan].
- 8 Kork A, Kivimäki R, Rimpelä A, et al. Terveyskioski palveluinnovaationa - Lahden terveyskioski- hankkeen väliarviointi (Vaihe II) (in Finnish). *Sitra* 2011:35.
- 9 Kork A, Vakkuri J. Matalan kynnyksen palvelumalli perusturvan palvelualueella (in Finnish). *Sitra* 2013:23.
- 10 Fairhall N, Sherrington C, Kurrle SE, et al. Effect of a multifactorial interdisciplinary intervention on mobility-related disability in frail older people: randomised controlled trial, *BMC Med* 2012;10:120 doi:10.1186/1741-7015-10-120 [doi] [published Online First: October 15].
- 11 Chan A, Tetzlaff JM, Altman DG, et al. SPIRIT 2013 statement: defining standard protocol items for clinical trials, *Ann Intern Med* 2013;158:200-7 doi:10.7326/0003-4819-158-3-201302050-00583 [published Online First: Feb 05,].
- 12 Mänty M, Heinonen A, Leinonen R, et al. Construct and predictive validity of a self-reported measure of preclinical mobility limitation, *Arch Phys Med Rehabil* 2007;88:1108-13.
- 13 Folstein MF, Folstein SE, McHugh PR. "Mini-mental state". A practical method for grading the cognitive state of patients for the clinician, *J Psychiatr Res* 1975;12:189-98.
- 14 Saunders JB, Aasland OG, Babor TF, et al. Development of the Alcohol Use Disorders Identification Test (AUDIT): WHO Collaborative Project on Early Detection of Persons with Harmful Alcohol Consumption--II, *Addiction* 1993;88:791-804 [published Online First: Jun].

- 1  
2  
3 1 15 Rollnick S, Miller WR. What is Motivational Interviewing? *Behavioural and Cognitive*  
4 2 *Psychotherapy* 1995;23:325-34 doi:10.1017/S135246580001643X [published Online First: /10].  
5  
6  
7 3 16 Bandura A. Social Foundations of Thoughts and Action: A Social Cognitive Theory.&nbsp;.  
8 4 Englewood Cliffs, New Jersey: Prentice-Hall 1986.  
9  
10 5 17 Prochaska JO, DiClemente CC. Stages of change in the modification of problem behaviors,  
11 6 *Prog Behav Modif* 1992;28:183-218.  
12  
13 7 18 Pajala S. IKINÄ-opas (in Finnish). *The Finnish National Institute for Health and Welfare*  
14 8 2018:183.  
15  
16  
17 9 19 Gardner MM, Buchner DM, Robertson MC, et al. Practical implementation of an exercise-  
18 10 based falls prevention programme, *Age Ageing* 2001;30:77-83 [published Online First: Jan].  
19  
20 11 20 Hauer K, Lamb SE, Jorstad EC, et al. Systematic review of definitions and methods of  
21 12 measuring falls in randomised controlled fall prevention trials, *Age Ageing* 2006;35:5-10  
22 13 doi:35/1/5 [pii] [published Online First: January 01].  
23  
24  
25 14 21 Husu P, Suni J, Vaha-Ypya H, et al. Objectively measured sedentary behavior and physical  
26 15 activity in a sample of Finnish adults: a cross-sectional study, *BMC Public Health* 2016;16:y  
27 16 doi:10.1186/s12889-016-3591-y [doi] [published Online First: September 01].  
28  
29  
30 17 22 Hukkanen H, Husu P, Sievanen H, et al. Aerobic physical activity assessed with  
31 18 accelerometer, diary, questionnaire, and interview in a Finnish population sample, *Scand J Med*  
32 19 *Sci Sports* 2018;28:2196-206 doi:10.1111/sms.13244 [doi] [published Online First: October 01].  
33  
34  
35 20 23 Waller K, Vaha-Ypya H, Tormakangas T, et al. Long-term leisure-time physical activity and  
36 21 other health habits as predictors of objectively monitored late-life physical activity - A 40-year  
37 22 twin study, *Sci Rep* 2018;8:7 doi:10.1038/s41598-018-27704-7 [doi] [published Online First:  
38 23 June 20].  
39  
40 24 24 Grimby G, Andren E, Daving Y, et al. Dependence and perceived difficulty in daily activities  
41 25 in community-living stroke survivors 2 years after stroke: a study of instrumental structures,  
42 26 *Stroke* 1998;29:1843-9.  
43  
44  
45 27 25 Rasinaho M, Hirvensalo M, Törmäkangas T, et al. Effect of physical activity counseling on  
46 28 physical activity of older people in Finland (ISRCTN 07330512), *Health Promot Int*  
47 29 2012;27:463-74 doi:10.1093/heapro/dar057 [published Online First: Dec].  
48  
49  
50 30 26 Podsiadlo D, Richardson S. The timed "Up & Go": a test of basic functional mobility for frail  
51 31 elderly persons, *J Am Geriatr Soc* 1991;39:142-8.  
52  
53 32 27 Guralnik JM, Simonsick EM, Ferrucci L, et al. A short physical performance battery  
54 33 assessing lower extremity function: association with self-reported disability and prediction of  
55 34 mortality and nursing home admission, *J Gerontol* 1994;49:85.  
56  
57  
58 35 28 Mathiowetz V, Kashman N, Volland G, et al. Grip and pinch strength: normative data for  
59 36 adults, *Arch Phys Med Rehabil* 1985;66:69-74 [published Online First: Feb].  
60

- 1  
2  
3 1 29 Anonymous . Development of the World Health Organization WHOQOL-BREF quality of  
4 2 life assessment. The WHOQOL Group, *Psychol Med* 1998;28:551-8 [published Online First:  
5 3 May].  
6  
7  
8 4 30 Kanis JA, Oden A, Johansson H, et al. FRAX and its applications to clinical practice, *Bone*  
9 5 2009;44:734-43 doi:10.1016/j.bone.2009.01.373 [published Online First: May].  
10  
11 6 31 Sheikh JI, Yesavage JA, Brooks JO, et al. Proposed factor structure of the Geriatric  
12 7 Depression Scale, *Int Psychogeriatr* 1991;3:23-8.  
13  
14 8 32 Powell LE, Myers AM. The Activities-specific Balance Confidence (ABC) Scale, *J Gerontol*  
15 9 *A Biol Sci Med Sci* 1995;50A:28.  
16  
17  
18 10 33 Huskisson EC. Measurement of pain, *Lancet* 1974;2:1127-31.  
19  
20 11 34 Miller-Davis C, Marden S, Leidy NK. The New York Heart Association Classes and  
21 12 functional status: what are we really measuring? *Heart Lung* 2006;35:217-24  
22 13 doi:10.1016/j.hrtlng.2006.01.003 [published Online First: Jul-Aug].  
23  
24 14 35 Anonymous . Orthostatic Test, *Scandinavian Journal of Clinical and Laboratory*  
25 15 *Investigation* 1984;44:38-54 doi:10.1080/00365518409169138 [published Online First: January  
26 16 1,].  
27  
28 17 36 Borg GA. Psychophysical bases of perceived exertion, *Med Sci Sports Exerc* 1982;14:377-81.  
29  
30 18 37 Moyé LA. Multiple Analyses in Clinical Trials: Fundamentals for Investigators. New York:  
31 19 Springer 2003.  
32  
33 20 38 Rantanen T, Portegijs E, Viljanen A, et al. Individual and environmental factors underlying  
34 21 life space of older people - study protocol and design of a cohort study on life-space mobility in  
35 22 old age (LISPE), *BMC Public Health* 2012;12:1018 doi:10.1186/1471-2458-12-1018 [published  
36 23 Online First: Nov 22,].  
37  
38 24 39 Gray AM, Clarke PM, Wolstenholme JL, et al. Applied Methods of Cost-effectiveness  
39 25 Analysis in Healthcare. Oxford, New York: Oxford University Press 2011.  
40  
41 26 40 Muthén LK, Muthén BO. Mplus user's guide: Statistical Analysis With Latent Variables. Los  
42 27 Angeles, CA: Muthén & Muthén 2009:850.  
43  
44  
45  
46  
47  
48  
49  
50  
51  
52  
53  
54  
55  
56  
57  
58  
59  
60

## 1 **AUTHORS' CONTRIBUTIONS**

2 Authorship is based on the ICMJE Recommendations (2013). RN is the responsible investigator  
3 who conceived the study and will oversee the data collection. The study was conceived with  
4 input from TaR, RD, UK, TT, HS, PK, AH, SS, LK, TiR, and OT. JE and SK are responsible for  
5 managing the data collection. JE wrote this protocol manuscript, the final version of which all  
6 other authors have revised and provided input according to their area of expertise. All authors  
7 approved the final version of the manuscript.

## 9 **FUNDING STATEMENT**

10 This work was supported by the Academy of Finland (grant number 289523).

## 12 **COMPETING INTERESTS STATEMENT**

13 Riku Nikander, University of Jyväskylä and GeroCenter foundation, Jyväskylä Finland, is a co-  
14 owner of the Devisys oy, Tampere Finland, a company that produces anti-slip devices for winter  
15 conditions.

## 17 **DATA AVAILABILITY STATEMENT**

18 De-identified participant data are available upon reasonable request from prof. Riku Nikander,  
19 riku.p.nikander@jyu.fi. Detailed IPD sharing statement is available at the ISRCTN registry  
20 (ISRCTN65406039).

## 22 **TABLES AND FIGURES**

23 Table 1. Content of the COSMOS 1 and 2 levels

24 Table 2. Outcome and other variables, methods and schedule of the assessments

25 Figure 1. Flow chart of the COSMOS study

26 Supplementary figure. Participant timeline

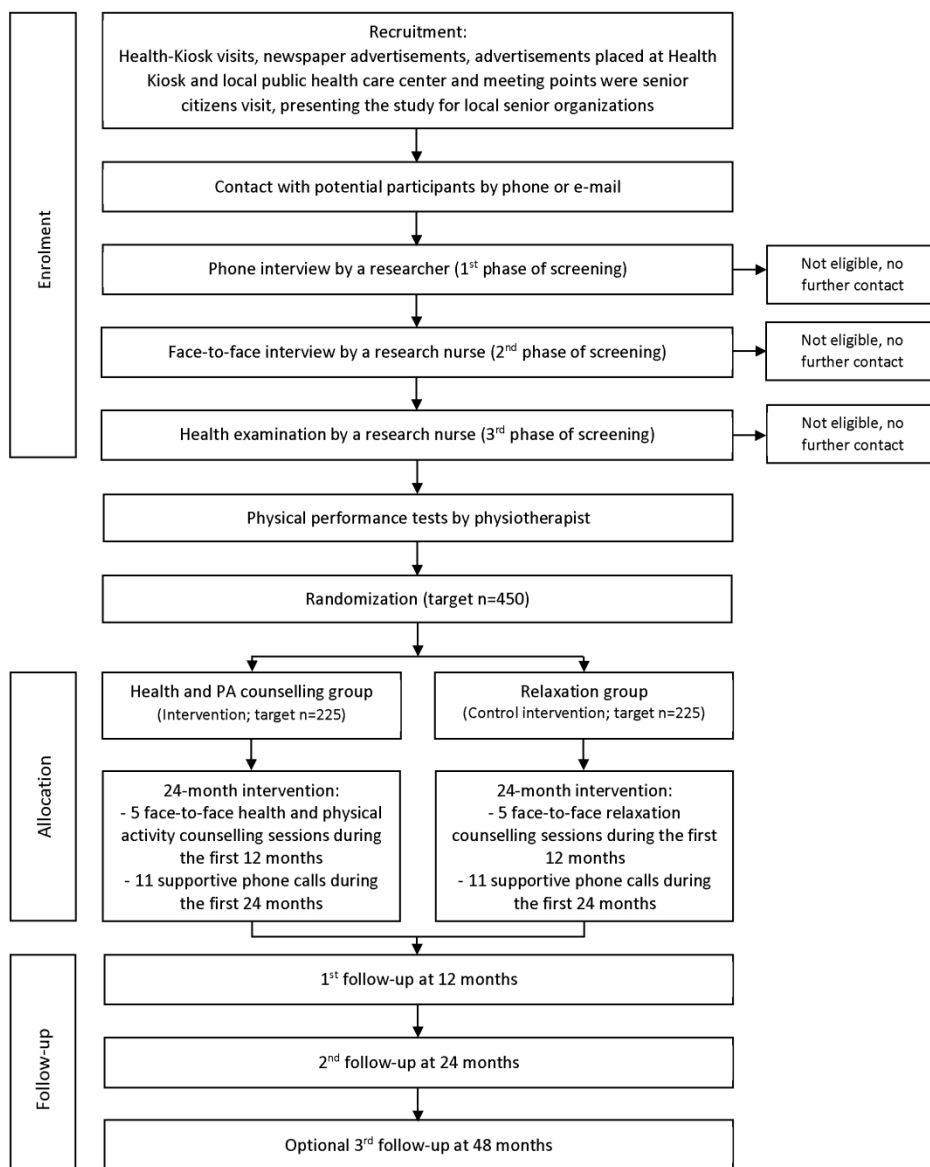

Figure 1. Flow chart of the COSMOS study

186x229mm (300 x 300 DPI)



1  
2  
3  
4  
5  
6  
7  
8  
9  
10  
11  
12  
13  
14  
15  
16  
17  
18  
19  
20  
21  
22  
23  
24  
25  
26  
27  
28  
29  
30  
31  
32  
33  
34  
35  
36  
37  
38  
39  
40  
41  
42  
43  
44  
45  
46  
47  
48  
49  
50  
51  
52  
53  
54  
55  
56  
57  
58  
59  
60

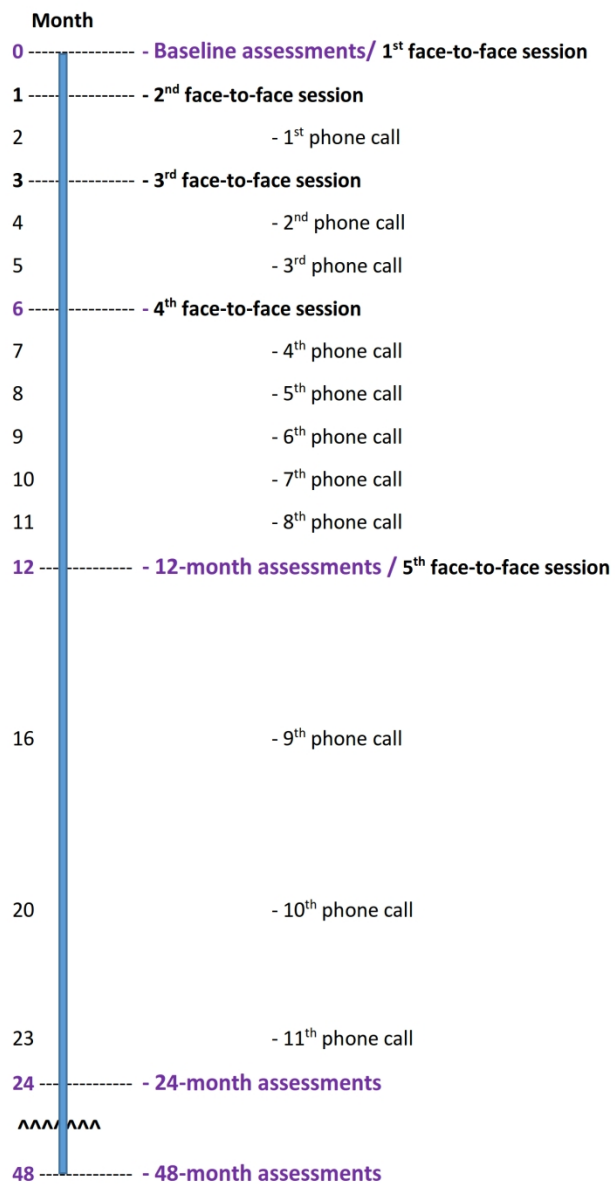

Supplementary figure. Participant timeline

350x663mm (96 x 96 DPI)

# Reporting checklist for protocol of a clinical trial.

Based on the SPIRIT guidelines.

## Instructions to authors

Complete this checklist by entering the page numbers from your manuscript where readers will find each of the items listed below.

Your article may not currently address all the items on the checklist. Please modify your text to include the missing information. If you are certain that an item does not apply, please write "n/a" and provide a short explanation.

Upload your completed checklist as an extra file when you submit to a journal.

In your methods section, say that you used the SPIRIT reporting guidelines, and cite them as:

Chan A-W, Tetzlaff JM, Altman DG, Laupacis A, Gøtzsche PC, Krleža-Jerić K, Hróbjartsson A, Mann H, Dickersin K, Berlin J, Doré C, Parulekar W, Summerskill W, Groves T, Schulz K, Sox H, Rockhold FW, Rennie D, Moher D. SPIRIT 2013 Statement: Defining standard protocol items for clinical trials. *Ann Intern Med.* 2013;158(3):200-207

|                    |                     |                                                                                                              | Page   |
|--------------------|---------------------|--------------------------------------------------------------------------------------------------------------|--------|
|                    |                     | Reporting Item                                                                                               | Number |
| Title              | <a href="#">#1</a>  | Descriptive title identifying the study design, population, interventions, and, if applicable, trial acronym | 1      |
| Trial registration | <a href="#">#2a</a> | Trial identifier and registry name. If not yet registered, name of intended registry                         | 2,6    |

|    |                     |                     |                                                          |      |
|----|---------------------|---------------------|----------------------------------------------------------|------|
| 1  | Trial registration: | <a href="#">#2b</a> | All items from the World Health Organization Trial       | 6    |
| 2  |                     |                     |                                                          |      |
| 3  | data set            |                     | Registration Data Set                                    |      |
| 4  |                     |                     |                                                          |      |
| 5  |                     |                     |                                                          |      |
| 6  | Protocol version    | <a href="#">#3</a>  | Date and version identifier                              | 1    |
| 7  |                     |                     |                                                          |      |
| 8  |                     |                     |                                                          |      |
| 9  | Funding             | <a href="#">#4</a>  | Sources and types of financial, material, and other      | 23   |
| 10 |                     |                     | support                                                  |      |
| 11 |                     |                     |                                                          |      |
| 12 |                     |                     |                                                          |      |
| 13 |                     |                     |                                                          |      |
| 14 |                     |                     |                                                          |      |
| 15 | Roles and           | <a href="#">#5a</a> | Names, affiliations, and roles of protocol contributors  | 1,23 |
| 16 |                     |                     |                                                          |      |
| 17 | responsibilities:   |                     |                                                          |      |
| 18 |                     |                     |                                                          |      |
| 19 | contributorship     |                     |                                                          |      |
| 20 |                     |                     |                                                          |      |
| 21 |                     |                     |                                                          |      |
| 22 |                     |                     |                                                          |      |
| 23 | Roles and           | <a href="#">#5b</a> | Name and contact information for the trial sponsor       | 1,23 |
| 24 |                     |                     |                                                          |      |
| 25 | responsibilities:   |                     |                                                          |      |
| 26 |                     |                     |                                                          |      |
| 27 | sponsor contact     |                     |                                                          |      |
| 28 |                     |                     |                                                          |      |
| 29 | information         |                     |                                                          |      |
| 30 |                     |                     |                                                          |      |
| 31 |                     |                     |                                                          |      |
| 32 | Roles and           | <a href="#">#5c</a> | Role of study sponsor and funders, if any, in study      | 17   |
| 33 |                     |                     |                                                          |      |
| 34 | responsibilities:   |                     | design; collection, management, analysis, and            |      |
| 35 |                     |                     | interpretation of data; writing of the report; and the   |      |
| 36 | sponsor and funder  |                     | decision to submit the report for publication, including |      |
| 37 |                     |                     | whether they will have ultimate authority over any of    |      |
| 38 |                     |                     | these activities                                         |      |
| 39 |                     |                     |                                                          |      |
| 40 |                     |                     |                                                          |      |
| 41 |                     |                     |                                                          |      |
| 42 |                     |                     |                                                          |      |
| 43 |                     |                     |                                                          |      |
| 44 |                     |                     |                                                          |      |
| 45 |                     |                     |                                                          |      |
| 46 |                     |                     |                                                          |      |
| 47 | Roles and           | <a href="#">#5d</a> | Composition, roles, and responsibilities of the          | 17   |
| 48 |                     |                     |                                                          |      |
| 49 | responsibilities:   |                     | coordinating centre, steering committee, endpoint        |      |
| 50 |                     |                     | adjudication committee, data management team, and        |      |
| 51 | committees          |                     | other individuals or groups overseeing the trial, if     |      |
| 52 |                     |                     | applicable (see Item 21a for data monitoring committee)  |      |
| 53 |                     |                     |                                                          |      |
| 54 |                     |                     |                                                          |      |
| 55 |                     |                     |                                                          |      |
| 56 |                     |                     |                                                          |      |
| 57 |                     |                     |                                                          |      |
| 58 |                     |                     |                                                          |      |
| 59 |                     |                     |                                                          |      |
| 60 |                     |                     |                                                          |      |

|    |                      |                      |                                                              |       |
|----|----------------------|----------------------|--------------------------------------------------------------|-------|
| 1  | Background and       | <a href="#">#6a</a>  | Description of research question and justification for       | 2,4-5 |
| 2  |                      |                      |                                                              |       |
| 3  | rationale            |                      | undertaking the trial, including summary of relevant         |       |
| 4  |                      |                      |                                                              |       |
| 5  |                      |                      | studies (published and unpublished) examining benefits       |       |
| 6  |                      |                      |                                                              |       |
| 7  |                      |                      | and harms for each intervention                              |       |
| 8  |                      |                      |                                                              |       |
| 9  |                      |                      |                                                              |       |
| 10 |                      |                      |                                                              |       |
| 11 | Background and       | <a href="#">#6b</a>  | Explanation for choice of comparators                        | 10-11 |
| 12 |                      |                      |                                                              |       |
| 13 | rationale: choice of |                      |                                                              |       |
| 14 |                      |                      |                                                              |       |
| 15 | comparators          |                      |                                                              |       |
| 16 |                      |                      |                                                              |       |
| 17 |                      |                      |                                                              |       |
| 18 | Objectives           | <a href="#">#7</a>   | Specific objectives or hypotheses                            | 5     |
| 19 |                      |                      |                                                              |       |
| 20 |                      |                      |                                                              |       |
| 21 |                      |                      |                                                              |       |
| 22 | Trial design         | <a href="#">#8</a>   | Description of trial design including type of trial (eg,     | 6     |
| 23 |                      |                      |                                                              |       |
| 24 |                      |                      | parallel group, crossover, factorial, single group),         |       |
| 25 |                      |                      |                                                              |       |
| 26 |                      |                      | allocation ratio, and framework (eg, superiority,            |       |
| 27 |                      |                      |                                                              |       |
| 28 |                      |                      | equivalence, non-inferiority, exploratory)                   |       |
| 29 |                      |                      |                                                              |       |
| 30 |                      |                      |                                                              |       |
| 31 |                      |                      |                                                              |       |
| 32 | Study setting        | <a href="#">#9</a>   | Description of study settings (eg, community clinic,         | 6     |
| 33 |                      |                      |                                                              |       |
| 34 |                      |                      | academic hospital) and list of countries where data will be  |       |
| 35 |                      |                      |                                                              |       |
| 36 |                      |                      | collected. Reference to where list of study sites can be     |       |
| 37 |                      |                      |                                                              |       |
| 38 |                      |                      | obtained                                                     |       |
| 39 |                      |                      |                                                              |       |
| 40 |                      |                      |                                                              |       |
| 41 |                      |                      |                                                              |       |
| 42 | Eligibility criteria | <a href="#">#10</a>  | Inclusion and exclusion criteria for participants. If        | 6-7   |
| 43 |                      |                      |                                                              |       |
| 44 |                      |                      | applicable, eligibility criteria for study centres and       |       |
| 45 |                      |                      |                                                              |       |
| 46 |                      |                      | individuals who will perform the interventions (eg,          |       |
| 47 |                      |                      |                                                              |       |
| 48 |                      |                      | surgeons, psychotherapists)                                  |       |
| 49 |                      |                      |                                                              |       |
| 50 |                      |                      |                                                              |       |
| 51 | Interventions:       | <a href="#">#11a</a> | Interventions for each group with sufficient detail to allow | 8-11  |
| 52 |                      |                      |                                                              |       |
| 53 | description          |                      | replication, including how and when they will be             |       |
| 54 |                      |                      |                                                              |       |
| 55 |                      |                      | administered                                                 |       |
| 56 |                      |                      |                                                              |       |
| 57 |                      |                      |                                                              |       |
| 58 |                      |                      |                                                              |       |
| 59 |                      |                      |                                                              |       |
| 60 |                      |                      |                                                              |       |

|    |                      |                      |                                                            |            |
|----|----------------------|----------------------|------------------------------------------------------------|------------|
| 1  | Interventions:       | <a href="#">#11b</a> | Criteria for discontinuing or modifying allocated          | 9-11       |
| 2  |                      |                      |                                                            |            |
| 3  | modifications        |                      | interventions for a given trial participant (eg, drug dose |            |
| 4  |                      |                      | change in response to harms, participant request, or       |            |
| 5  |                      |                      | improving / worsening disease)                             |            |
| 6  |                      |                      |                                                            |            |
| 7  |                      |                      |                                                            |            |
| 8  |                      |                      |                                                            |            |
| 9  |                      |                      |                                                            |            |
| 10 |                      |                      |                                                            |            |
| 11 | Interventions:       | <a href="#">#11c</a> | Strategies to improve adherence to intervention            | 9-11       |
| 12 |                      |                      |                                                            |            |
| 13 | adherence            |                      | protocols, and any procedures for monitoring adherence     |            |
| 14 |                      |                      | (eg, drug tablet return; laboratory tests)                 |            |
| 15 |                      |                      |                                                            |            |
| 16 |                      |                      |                                                            |            |
| 17 |                      |                      |                                                            |            |
| 18 |                      |                      |                                                            |            |
| 19 | Interventions:       | <a href="#">#11d</a> | Relevant concomitant care and interventions that are       | 9-11       |
| 20 |                      |                      | permitted or prohibited during the trial                   |            |
| 21 | concomitant care     |                      |                                                            |            |
| 22 |                      |                      |                                                            |            |
| 23 |                      |                      |                                                            |            |
| 24 | Outcomes             | <a href="#">#12</a>  | Primary, secondary, and other outcomes, including the      | 11-15      |
| 25 |                      |                      | specific measurement variable (eg, systolic blood          |            |
| 26 |                      |                      | pressure), analysis metric (eg, change from baseline,      |            |
| 27 |                      |                      | final value, time to event), method of aggregation (eg,    |            |
| 28 |                      |                      | median, proportion), and time point for each outcome.      |            |
| 29 |                      |                      | Explanation of the clinical relevance of chosen efficacy   |            |
| 30 |                      |                      | and harm outcomes is strongly recommended                  |            |
| 31 |                      |                      |                                                            |            |
| 32 |                      |                      |                                                            |            |
| 33 |                      |                      |                                                            |            |
| 34 |                      |                      |                                                            |            |
| 35 |                      |                      |                                                            |            |
| 36 |                      |                      |                                                            |            |
| 37 |                      |                      |                                                            |            |
| 38 |                      |                      |                                                            |            |
| 39 |                      |                      |                                                            |            |
| 40 |                      |                      |                                                            |            |
| 41 | Participant timeline | <a href="#">#13</a>  | Time schedule of enrolment, interventions (including any   | 8,         |
| 42 |                      |                      | run-ins and washouts), assessments, and visits for         |            |
| 43 |                      |                      | participants. A schematic diagram is highly                | suppl.fig. |
| 44 |                      |                      | recommended (see Figure)                                   |            |
| 45 |                      |                      |                                                            |            |
| 46 |                      |                      |                                                            |            |
| 47 |                      |                      |                                                            |            |
| 48 |                      |                      |                                                            |            |
| 49 |                      |                      |                                                            |            |
| 50 |                      |                      |                                                            |            |
| 51 | Sample size          | <a href="#">#14</a>  | Estimated number of participants needed to achieve         | 2,15       |
| 52 |                      |                      | study objectives and how it was determined, including      |            |
| 53 |                      |                      | clinical and statistical assumptions supporting any        |            |
| 54 |                      |                      | sample size calculations                                   |            |
| 55 |                      |                      |                                                            |            |
| 56 |                      |                      |                                                            |            |
| 57 |                      |                      |                                                            |            |
| 58 |                      |                      |                                                            |            |
| 59 |                      |                      |                                                            |            |
| 60 |                      |                      |                                                            |            |

|    |                      |                      |                                                            |     |
|----|----------------------|----------------------|------------------------------------------------------------|-----|
| 1  | Recruitment          | <a href="#">#15</a>  | Strategies for achieving adequate participant enrolment    | 7   |
| 2  |                      |                      |                                                            |     |
| 3  |                      |                      | to reach target sample size                                |     |
| 4  |                      |                      |                                                            |     |
| 5  |                      |                      |                                                            |     |
| 6  | Allocation: sequence | <a href="#">#16a</a> | Method of generating the allocation sequence (eg,          | 8   |
| 7  | generation           |                      | computer-generated random numbers), and list of any        |     |
| 8  |                      |                      | factors for stratification. To reduce predictability of a  |     |
| 9  |                      |                      | random sequence, details of any planned restriction (eg,   |     |
| 10 |                      |                      | blocking) should be provided in a separate document that   |     |
| 11 |                      |                      | is unavailable to those who enrol participants or assign   |     |
| 12 |                      |                      | interventions                                              |     |
| 13 |                      |                      |                                                            |     |
| 14 |                      |                      |                                                            |     |
| 15 |                      |                      |                                                            |     |
| 16 |                      |                      |                                                            |     |
| 17 |                      |                      |                                                            |     |
| 18 |                      |                      |                                                            |     |
| 19 |                      |                      |                                                            |     |
| 20 |                      |                      |                                                            |     |
| 21 |                      |                      |                                                            |     |
| 22 |                      |                      |                                                            |     |
| 23 | Allocation           | <a href="#">#16b</a> | Mechanism of implementing the allocation sequence (eg,     | 8   |
| 24 | concealment          |                      | central telephone; sequentially numbered, opaque,          |     |
| 25 |                      |                      | sealed envelopes), describing any steps to conceal the     |     |
| 26 | mechanism            |                      | sequence until interventions are assigned                  |     |
| 27 |                      |                      |                                                            |     |
| 28 |                      |                      |                                                            |     |
| 29 |                      |                      |                                                            |     |
| 30 |                      |                      |                                                            |     |
| 31 |                      |                      |                                                            |     |
| 32 |                      |                      |                                                            |     |
| 33 | Allocation:          | <a href="#">#16c</a> | Who will generate the allocation sequence, who will enrol  | 8   |
| 34 | implementation       |                      | participants, and who will assign participants to          |     |
| 35 |                      |                      | interventions                                              |     |
| 36 |                      |                      |                                                            |     |
| 37 |                      |                      |                                                            |     |
| 38 |                      |                      |                                                            |     |
| 39 |                      |                      |                                                            |     |
| 40 |                      |                      |                                                            |     |
| 41 | Blinding (masking)   | <a href="#">#17a</a> | Who will be blinded after assignment to interventions (eg, | 8   |
| 42 |                      |                      | trial participants, care providers, outcome assessors,     |     |
| 43 |                      |                      | data analysts), and how                                    |     |
| 44 |                      |                      |                                                            |     |
| 45 |                      |                      |                                                            |     |
| 46 |                      |                      |                                                            |     |
| 47 |                      |                      |                                                            |     |
| 48 | Blinding (masking):  | <a href="#">#17b</a> | If blinded, circumstances under which unblinding is        | n/a |
| 49 | emergency            |                      | permissible, and procedure for revealing a participant's   |     |
| 50 |                      |                      | allocated intervention during the trial                    |     |
| 51 | unblinding           |                      |                                                            |     |
| 52 |                      |                      |                                                            |     |
| 53 |                      |                      |                                                            |     |
| 54 |                      |                      |                                                            |     |
| 55 |                      |                      |                                                            |     |
| 56 |                      |                      |                                                            |     |
| 57 |                      |                      |                                                            |     |
| 58 |                      |                      |                                                            |     |
| 59 |                      |                      |                                                            |     |
| 60 |                      |                      |                                                            |     |

|    |                        |                      |                                                                |       |
|----|------------------------|----------------------|----------------------------------------------------------------|-------|
| 1  | Data collection plan   | <a href="#">#18a</a> | Plans for assessment and collection of outcome,                | 16-17 |
| 2  |                        |                      | baseline, and other trial data, including any related          |       |
| 3  |                        |                      | processes to promote data quality (eg, duplicate               |       |
| 4  |                        |                      | measurements, training of assessors) and a description         |       |
| 5  |                        |                      | of study instruments (eg, questionnaires, laboratory tests)    |       |
| 6  |                        |                      | along with their reliability and validity, if known.           |       |
| 7  |                        |                      |                                                                |       |
| 8  |                        |                      | Reference to where data collection forms can be found, if      |       |
| 9  |                        |                      | not in the protocol                                            |       |
| 10 |                        |                      |                                                                |       |
| 11 | Data collection plan:  | <a href="#">#18b</a> | Plans to promote participant retention and complete            | 16-17 |
| 12 | retention              |                      | follow-up, including list of any outcome data to be            |       |
| 13 |                        |                      | collected for participants who discontinue or deviate from     |       |
| 14 |                        |                      | intervention protocols                                         |       |
| 15 |                        |                      |                                                                |       |
| 16 |                        |                      |                                                                |       |
| 17 |                        |                      |                                                                |       |
| 18 |                        |                      |                                                                |       |
| 19 |                        |                      |                                                                |       |
| 20 | Data management        | <a href="#">#19</a>  | Plans for data entry, coding, security, and storage,           | 16-17 |
| 21 |                        |                      | including any related processes to promote data quality        |       |
| 22 |                        |                      | (eg, double data entry; range checks for data values).         |       |
| 23 |                        |                      | Reference to where details of data management                  |       |
| 24 |                        |                      | procedures can be found, if not in the protocol                |       |
| 25 |                        |                      |                                                                |       |
| 26 |                        |                      |                                                                |       |
| 27 |                        |                      |                                                                |       |
| 28 |                        |                      |                                                                |       |
| 29 |                        |                      |                                                                |       |
| 30 | Statistics: outcomes   | <a href="#">#20a</a> | Statistical methods for analysing primary and secondary        | 16-17 |
| 31 |                        |                      | outcomes. Reference to where other details of the              |       |
| 32 |                        |                      | statistical analysis plan can be found, if not in the protocol |       |
| 33 |                        |                      |                                                                |       |
| 34 |                        |                      |                                                                |       |
| 35 |                        |                      |                                                                |       |
| 36 |                        |                      |                                                                |       |
| 37 |                        |                      |                                                                |       |
| 38 |                        |                      |                                                                |       |
| 39 |                        |                      |                                                                |       |
| 40 |                        |                      |                                                                |       |
| 41 |                        |                      |                                                                |       |
| 42 | Statistics: additional | <a href="#">#20b</a> | Methods for any additional analyses (eg, subgroup and          | 16-17 |
| 43 | analyses               |                      | adjusted analyses)                                             |       |
| 44 |                        |                      |                                                                |       |
| 45 |                        |                      |                                                                |       |
| 46 |                        |                      |                                                                |       |
| 47 |                        |                      |                                                                |       |
| 48 |                        |                      |                                                                |       |
| 49 |                        |                      |                                                                |       |
| 50 |                        |                      |                                                                |       |
| 51 |                        |                      |                                                                |       |
| 52 |                        |                      |                                                                |       |
| 53 |                        |                      |                                                                |       |
| 54 |                        |                      |                                                                |       |
| 55 |                        |                      |                                                                |       |
| 56 |                        |                      |                                                                |       |
| 57 |                        |                      |                                                                |       |
| 58 |                        |                      |                                                                |       |
| 59 |                        |                      |                                                                |       |
| 60 |                        |                      |                                                                |       |

|    |                      |                      |                                                             |       |
|----|----------------------|----------------------|-------------------------------------------------------------|-------|
| 1  | Statistics: analysis | <a href="#">#20c</a> | Definition of analysis population relating to protocol non- | 16-17 |
| 2  |                      |                      |                                                             |       |
| 3  | population and       |                      | adherence (eg, as randomised analysis), and any             |       |
| 4  |                      |                      |                                                             |       |
| 5  | missing data         |                      | statistical methods to handle missing data (eg, multiple    |       |
| 6  |                      |                      |                                                             |       |
| 7  |                      |                      | imputation)                                                 |       |
| 8  |                      |                      |                                                             |       |
| 9  |                      |                      |                                                             |       |
| 10 |                      |                      |                                                             |       |
| 11 | Data monitoring:     | <a href="#">#21a</a> | Composition of data monitoring committee (DMC);             | 17    |
| 12 |                      |                      |                                                             |       |
| 13 | formal committee     |                      | summary of its role and reporting structure; statement of   |       |
| 14 |                      |                      |                                                             |       |
| 15 |                      |                      | whether it is independent from the sponsor and              |       |
| 16 |                      |                      | competing interests; and reference to where further         |       |
| 17 |                      |                      | details about its charter can be found, if not in the       |       |
| 18 |                      |                      | protocol. Alternatively, an explanation of why a DMC is     |       |
| 19 |                      |                      | not needed                                                  |       |
| 20 |                      |                      |                                                             |       |
| 21 |                      |                      |                                                             |       |
| 22 |                      |                      |                                                             |       |
| 23 |                      |                      |                                                             |       |
| 24 |                      |                      |                                                             |       |
| 25 |                      |                      |                                                             |       |
| 26 |                      |                      |                                                             |       |
| 27 |                      |                      |                                                             |       |
| 28 | Data monitoring:     | <a href="#">#21b</a> | Description of any interim analyses and stopping            | n/a   |
| 29 |                      |                      |                                                             |       |
| 30 | interim analysis     |                      | guidelines, including who will have access to these         |       |
| 31 |                      |                      |                                                             |       |
| 32 |                      |                      | interim results and make the final decision to terminate    |       |
| 33 |                      |                      |                                                             |       |
| 34 |                      |                      | the trial                                                   |       |
| 35 |                      |                      |                                                             |       |
| 36 |                      |                      |                                                             |       |
| 37 |                      |                      |                                                             |       |
| 38 | Harms                | <a href="#">#22</a>  | Plans for collecting, assessing, reporting, and managing    | 18    |
| 39 |                      |                      |                                                             |       |
| 40 |                      |                      | solicited and spontaneously reported adverse events and     |       |
| 41 |                      |                      |                                                             |       |
| 42 |                      |                      | other unintended effects of trial interventions or trial    |       |
| 43 |                      |                      |                                                             |       |
| 44 |                      |                      | conduct                                                     |       |
| 45 |                      |                      |                                                             |       |
| 46 |                      |                      |                                                             |       |
| 47 |                      |                      |                                                             |       |
| 48 | Auditing             | <a href="#">#23</a>  | Frequency and procedures for auditing trial conduct, if     | 17    |
| 49 |                      |                      |                                                             |       |
| 50 |                      |                      | any, and whether the process will be independent from       |       |
| 51 |                      |                      |                                                             |       |
| 52 |                      |                      | investigators and the sponsor                               |       |
| 53 |                      |                      |                                                             |       |
| 54 |                      |                      |                                                             |       |
| 55 | Research ethics      | <a href="#">#24</a>  | Plans for seeking research ethics committee / institutional | 2,18  |
| 56 |                      |                      |                                                             |       |
| 57 | approval             |                      | review board (REC / IRB) approval                           |       |
| 58 |                      |                      |                                                             |       |
| 59 |                      |                      |                                                             |       |
| 60 |                      |                      |                                                             |       |



|    |                    |                      |                                                                |     |
|----|--------------------|----------------------|----------------------------------------------------------------|-----|
| 1  | Protocol           | <a href="#">#25</a>  | Plans for communicating important protocol modifications       | 18  |
| 2  |                    |                      |                                                                |     |
| 3  | amendments         |                      | (eg, changes to eligibility criteria, outcomes, analyses) to   |     |
| 4  |                    |                      | relevant parties (eg, investigators, REC / IRBs, trial         |     |
| 5  |                    |                      | participants, trial registries, journals, regulators)          |     |
| 6  |                    |                      |                                                                |     |
| 7  |                    |                      |                                                                |     |
| 8  |                    |                      |                                                                |     |
| 9  |                    |                      |                                                                |     |
| 10 |                    |                      |                                                                |     |
| 11 | Consent or assent  | <a href="#">#26a</a> | Who will obtain informed consent or assent from potential      | 7   |
| 12 |                    |                      | trial participants or authorised surrogates, and how (see      |     |
| 13 |                    |                      | Item 32)                                                       |     |
| 14 |                    |                      |                                                                |     |
| 15 |                    |                      |                                                                |     |
| 16 |                    |                      |                                                                |     |
| 17 |                    |                      |                                                                |     |
| 18 |                    |                      |                                                                |     |
| 19 | Consent or assent: | <a href="#">#26b</a> | Additional consent provisions for collection and use of        | n/a |
| 20 | ancillary studies  |                      | participant data and biological specimens in ancillary         |     |
| 21 |                    |                      | studies, if applicable                                         |     |
| 22 |                    |                      |                                                                |     |
| 23 |                    |                      |                                                                |     |
| 24 |                    |                      |                                                                |     |
| 25 |                    |                      |                                                                |     |
| 26 | Confidentiality    | <a href="#">#27</a>  | How personal information about potential and enrolled          | 18  |
| 27 |                    |                      | participants will be collected, shared, and maintained in      |     |
| 28 |                    |                      | order to protect confidentiality before, during, and after     |     |
| 29 |                    |                      | the trial                                                      |     |
| 30 |                    |                      |                                                                |     |
| 31 |                    |                      |                                                                |     |
| 32 |                    |                      |                                                                |     |
| 33 |                    |                      |                                                                |     |
| 34 |                    |                      |                                                                |     |
| 35 |                    |                      |                                                                |     |
| 36 | Declaration of     | <a href="#">#28</a>  | Financial and other competing interests for principal          | 23  |
| 37 | interests          |                      | investigators for the overall trial and each study site        |     |
| 38 |                    |                      |                                                                |     |
| 39 |                    |                      |                                                                |     |
| 40 |                    |                      |                                                                |     |
| 41 |                    |                      |                                                                |     |
| 42 | Data access        | <a href="#">#29</a>  | Statement of who will have access to the final trial           | 23  |
| 43 |                    |                      | dataset, and disclosure of contractual agreements that         |     |
| 44 |                    |                      | limit such access for investigators                            |     |
| 45 |                    |                      |                                                                |     |
| 46 |                    |                      |                                                                |     |
| 47 |                    |                      |                                                                |     |
| 48 |                    |                      |                                                                |     |
| 49 | Ancillary and post | <a href="#">#30</a>  | Provisions, if any, for ancillary and post-trial care, and for | n/a |
| 50 | trial care         |                      | compensation to those who suffer harm from trial               |     |
| 51 |                    |                      | participation                                                  |     |
| 52 |                    |                      |                                                                |     |
| 53 |                    |                      |                                                                |     |
| 54 |                    |                      |                                                                |     |
| 55 |                    |                      |                                                                |     |
| 56 |                    |                      |                                                                |     |
| 57 |                    |                      |                                                                |     |
| 58 |                    |                      |                                                                |     |
| 59 |                    |                      |                                                                |     |
| 60 |                    |                      |                                                                |     |

|    |                       |                      |                                                               |     |
|----|-----------------------|----------------------|---------------------------------------------------------------|-----|
| 1  | Dissemination         | <a href="#">#31a</a> | Plans for investigators and sponsor to communicate trial      | 18  |
| 2  |                       |                      |                                                               |     |
| 3  | policy: trial results |                      | results to participants, healthcare professionals, the        |     |
| 4  |                       |                      | public, and other relevant groups (eg, via publication,       |     |
| 5  |                       |                      | reporting in results databases, or other data sharing         |     |
| 6  |                       |                      | arrangements), including any publication restrictions         |     |
| 7  |                       |                      |                                                               |     |
| 8  |                       |                      |                                                               |     |
| 9  |                       |                      |                                                               |     |
| 10 |                       |                      |                                                               |     |
| 11 |                       |                      |                                                               |     |
| 12 |                       |                      |                                                               |     |
| 13 | Dissemination         | <a href="#">#31b</a> | Authorship eligibility guidelines and any intended use of     | 23  |
| 14 |                       |                      |                                                               |     |
| 15 | policy: authorship    |                      | professional writers                                          |     |
| 16 |                       |                      |                                                               |     |
| 17 |                       |                      |                                                               |     |
| 18 |                       |                      |                                                               |     |
| 19 | Dissemination         | <a href="#">#31c</a> | Plans, if any, for granting public access to the full         | ,23 |
| 20 |                       |                      |                                                               |     |
| 21 | policy: reproducible  |                      | protocol, participant-level dataset, and statistical code     |     |
| 22 |                       |                      |                                                               |     |
| 23 | research              |                      |                                                               |     |
| 24 |                       |                      |                                                               |     |
| 25 |                       |                      |                                                               |     |
| 26 | Informed consent      | <a href="#">#32</a>  | Model consent form and other related documentation            | n/a |
| 27 |                       |                      |                                                               |     |
| 28 | materials             |                      | given to participants and authorised surrogates               |     |
| 29 |                       |                      |                                                               |     |
| 30 |                       |                      |                                                               |     |
| 31 |                       |                      |                                                               |     |
| 32 | Biological            | <a href="#">#33</a>  | Plans for collection, laboratory evaluation, and storage of   | n/a |
| 33 |                       |                      |                                                               |     |
| 34 | specimens             |                      | biological specimens for genetic or molecular analysis in     |     |
| 35 |                       |                      |                                                               |     |
| 36 |                       |                      |                                                               |     |
| 37 |                       |                      | the current trial and for future use in ancillary studies, if |     |
| 38 |                       |                      |                                                               |     |
| 39 |                       |                      | applicable                                                    |     |
| 40 |                       |                      |                                                               |     |

41  
 42 The SPIRIT checklist is distributed under the terms of the Creative Commons Attribution License CC-  
 43 BY-ND 3.0. This checklist can be completed online using <https://www.goodreports.org/>, a tool made  
 44 by the [EQUATOR Network](#) in collaboration with [Penelope.ai](#)  
 45  
 46  
 47  
 48  
 49  
 50  
 51  
 52  
 53  
 54  
 55  
 56  
 57  
 58  
 59  
 60
