# Supplementary figures and images for: Counselling for physical activity, life-space mobility and falls prevention in old age (COSMOS): protocol of a randomised controlled trial
Source: PubMed Central journal article supplement — BMJ Open. 2019 Sep 24;9(9):e029682. doi: 10.1136/bmjopen-2019-029682 (PMC6773309; doi:10.1136/bmjopen-2019-029682), 2019-09-24

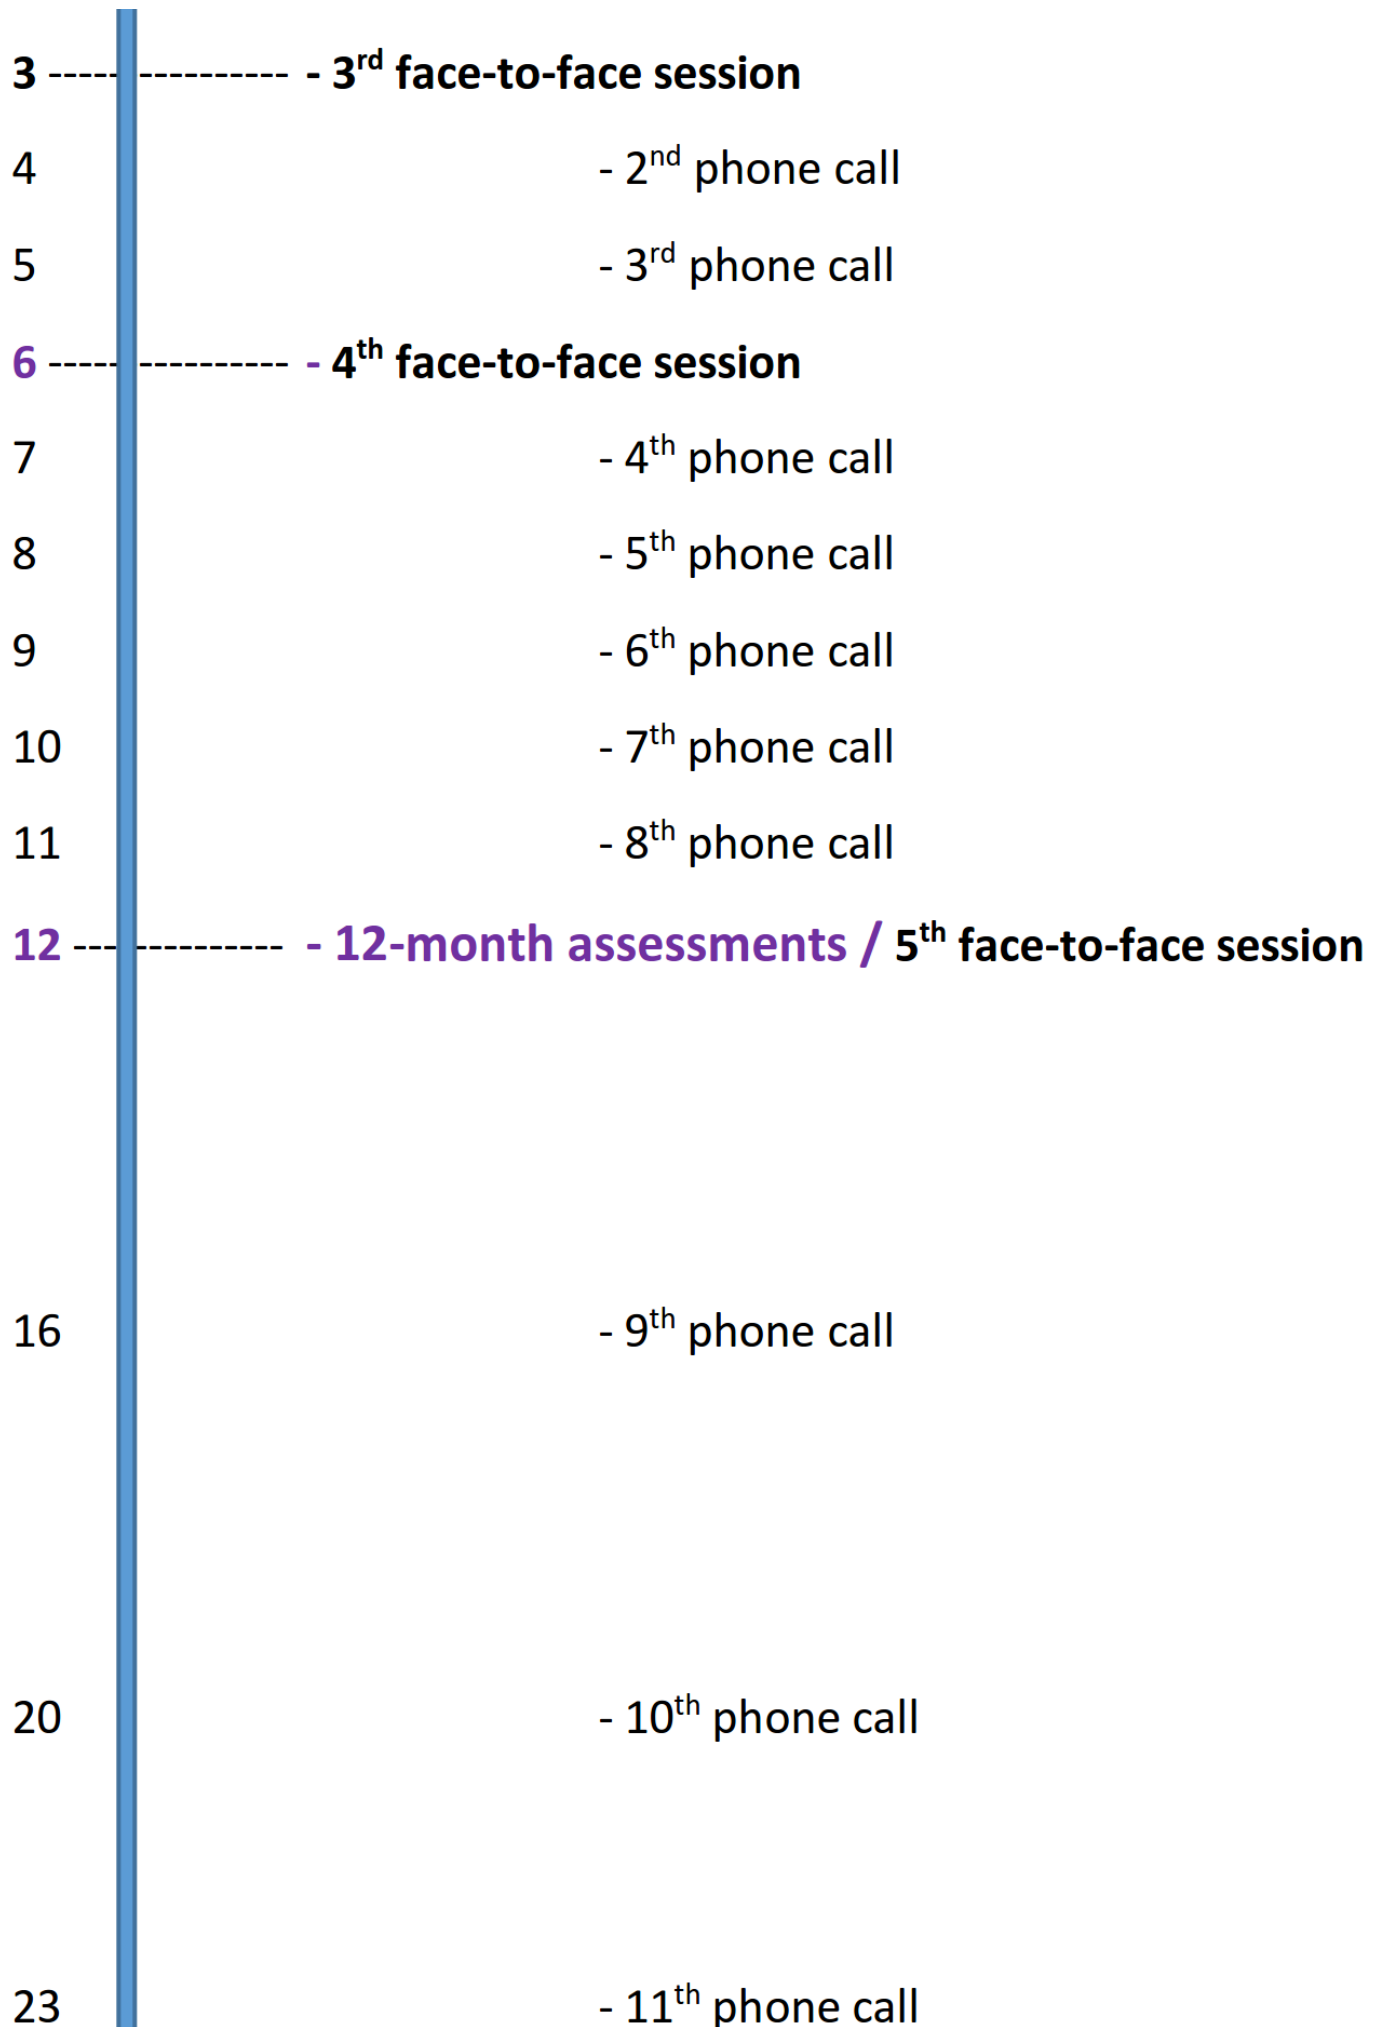

Supplement: bmjopen-2019-029682supp001.pdf [file bmjopen-2019-029682supp001.pdf]
